# Supplementary material
Source: Frontiers journal article supplement (https://www.frontiersin.org/articles/17261)
Supplement: Data_Sheet_4.XLS [file Data_Sheet_4.XLS]

## Sheet: All Genes, 12 samples
		V231	V239	V240	V230	V232	V233
		WT	WT	WT	MBL	MBL	MBL
		14 day	14 day	14 day	14 day	14 day	14 day
GeneSymbol	EntrezGeneID							MBL/WT	p
Car3	12350	0.03	0.03	0.0365599	0.398991	0.467134	0.894784	18.2364	0.0232668
Opn4	30044	0.0509754	0.0554875	0.0971972	0.623666	1.04944	0.626223	11.29	0.00798484
Dbh	13166	0.03	0.130863	0.238896	0.833908	1.32424	1.22903	8.47306	0.00353453
Pyroxd2	74580	0.0356702	0.03	0.0709247	0.345515	0.398872	0.386393	8.27835	8.69892e-05
Hamp2	66438	0.107356	0.03	0.0462173	0.509598	0.416101	0.27274	6.52841	0.00968147
Cfd	11537	0.521551	0.246319	0.110383	1.80425	1.45592	2.40088	6.4458	0.0061196
Retn	57264	0.08377	0.0602044	0.0431545	0.361481	0.246529	0.559787	6.2406	0.0239336
Gm12250	631323	0.064679	0.187663	0.101769	0.668921	0.724559	0.782593	6.14518	0.00024408
1700112E06Rik	76633	0.0323296	0.03	0.03	0.26629	0.148516	0.139085	5.99906	0.0197892
Tgtp1	21822	0.0772031	0.090699	0.0437736	0.383313	0.389052	0.463575	5.83884	0.000313098
Samd8	67630	0.039444	0.03	0.03	0.205906	0.164339	0.185432	5.58784	0.00025431
E430029J22Rik	100033459	0.03	0.03	0.0526553	0.199062	0.159811	0.195904	4.92455	0.00055381
Rnls	67795	0.286767	0.445704	0.521351	2.00238	2.30623	1.774	4.85126	0.0006777
Mtl5	17771	0.0714215	0.0705403	0.0829093	0.455629	0.353066	0.279496	4.83918	0.00493662
Ccnb1ip1	239083	0.03	0.03	0.03	0.133046	0.121006	0.161497	4.61721	0.000829716
Cd74	16149	5.43577	8.54172	3.95276	14.736	27.4613	35.8716	4.35404	0.0333211
Adipoq	11450	0.105199	0.0965673	0.0590825	0.378556	0.271591	0.480026	4.33268	0.00939546
Gm8075	666385	0.462072	0.433838	0.515563	1.39005	1.72456	2.88652	4.25169	0.0280691
Mrgprh	80978	0.0506626	0.0535092	0.03	0.186913	0.268394	0.114732	4.24858	0.0320155
Lcat	16816	0.03	0.03	0.03	0.111901	0.113249	0.153348	4.20553	0.00210863
Cxcl5	20311	0.03	0.03	0.0724461	0.16286	0.135998	0.228843	3.98427	0.013159
Cidec	14311	0.03	0.03	0.0447349	0.100176	0.124655	0.181558	3.88016	0.0150102
Slc25a37	67712	0.0595689	0.0350873	0.03	0.0864746	0.178199	0.197811	3.71008	0.0338099
Retnla	57262	0.465919	0.382351	0.245821	0.80312	1.56907	1.46939	3.51121	0.0211971
Gm6603	625586	2.51797	2.27505	1.87383	7.60726	7.98952	7.48939	3.46283	2.22506e-05
Tgtp2	100039796	8.40416	10.2658	5.50885	24.3195	23.4683	34.9731	3.42287	0.00780708
Xk	22439	0.03	0.03	0.03	0.117545	0.103105	0.0794107	3.33401	0.00324636
Per3	18628	0.03	0.0432807	0.10181	0.123625	0.246594	0.213211	3.33216	0.0336015
Gm12409	100040567	0.03	0.0307919	0.0350745	0.150793	0.0938962	0.0732223	3.31619	0.0334063
Dok7	231134	0.115693	0.110222	0.134605	0.431343	0.326492	0.423061	3.27554	0.00136469
Morn4	226123	0.03	0.03	0.0330124	0.100764	0.0919022	0.108905	3.24227	0.000156557
Cib3	234421	0.135773	0.115451	0.100159	0.29785	0.283049	0.556595	3.23719	0.0427892
E430029J22Rik	100033459	0.03	0.03	0.03	0.0931969	0.0755933	0.119991	3.20868	0.00682261
Smyd1	12180	0.443343	0.487522	0.424591	1.50969	1.66486	1.16437	3.20108	0.00262482
Sertad4	214791	0.0708621	0.03	0.0370066	0.128322	0.118997	0.193347	3.19627	0.0191262
D7Wsu130e	28017	0.178514	0.177667	0.150647	0.558277	0.477389	0.570509	3.16907	0.000279189
Cubn	65969	0.03	0.0365237	0.0493317	0.14719	0.1339	0.0859925	3.16845	0.012552
LOC100045752	100045752	0.03	0.0430949	0.0574779	0.138343	0.134617	0.140065	3.16317	0.000312544
Apol10b	328561	0.121232	0.0403628	0.123859	0.23362	0.246184	0.418919	3.1484	0.0359272
D830015G02Rik	791403	2.57941	2.6266	0.30638	5.62899	6.60776	4.60935	3.05604	0.01695
Gm3696	100042149	0.03	0.03	0.03	0.0959587	0.11314	0.0637984	3.03219	0.0135217
Fmod	14264	0.202354	0.116345	0.146383	0.274411	0.592065	0.543579	3.03184	0.0366013
Ramp1	51801	1.25865	2.14525	2.77546	5.08931	7.63713	5.90015	3.01432	0.00887541
Igtp	16145	1.82063	4.25109	2.56111	6.16391	10.7993	8.97983	3.00516	0.0195081
Zmynd17	74843	0.0481318	0.0580901	0.0356693	0.185733	0.101417	0.133366	2.96365	0.0216972
Gbp4	17472	0.298228	0.797103	0.400002	1.50874	1.15436	1.76447	2.96092	0.0138222
2310002D06Rik	69522	0.052371	0.03	0.03	0.13259	0.0860441	0.107786	2.90484	0.00973085
1700113H08Rik	76640	0.03	0.0520383	0.0501126	0.139814	0.151116	0.0919885	2.89758	0.0126549
D630003M21Rik	228846	0.0974819	0.0702549	0.0975199	0.172811	0.234783	0.359356	2.89135	0.0396357
Prickle4	381104	0.0768195	0.03	0.0495211	0.157818	0.116323	0.177092	2.88621	0.0119618
Gm3983	100042713	0.044729	0.0697668	0.0887921	0.164303	0.268284	0.15382	2.88461	0.0299293
Atp6ap1l	435376	0.11547	0.25976	0.393391	0.575468	0.853946	0.763948	2.85363	0.0143996
Mcpt4	17227	0.226162	0.41695	0.231979	0.753588	0.846219	0.877884	2.83135	0.00184647
Slc46a3	71706	0.646197	0.54711	0.708329	1.4176	2.27953	1.65435	2.81414	0.011691
Ifi203	15950	0.135729	0.0725337	0.151766	0.342166	0.303382	0.367468	2.81371	0.00204704
T2	21331	0.03	0.0766812	0.0636591	0.125326	0.222043	0.127556	2.78809	0.0432654
Hic1	15248	0.166076	0.18312	0.194178	0.377311	0.719148	0.407839	2.76844	0.0430422
Tgtp2	100039796	0.100667	0.143452	0.0953039	0.33988	0.234611	0.36212	2.75942	0.00916958
Tstd1	226654	0.0373376	0.03	0.0339486	0.12339	0.0594019	0.0933481	2.72634	0.0350894
Cma2	545055	0.269537	0.418299	0.220642	0.710203	0.84834	0.905363	2.71213	0.00334826
Gm3187	100041184	0.0387422	0.03	0.03	0.109981	0.0756828	0.0821259	2.71201	0.00669852
Acrbp	54137	0.0436744	0.03	0.03	0.0727159	0.0813967	0.127006	2.71155	0.0275085
Ptn	19242	0.287275	0.445284	0.359086	0.688651	0.899626	1.36692	2.7071	0.0390808
Vmn2r29	76229	0.03	0.03	0.03	0.0699973	0.0894583	0.0821859	2.6849	0.000879582
Gm1966	434223	0.870142	0.797393	1.06816	2.38245	2.34324	2.60195	2.67853	0.000178787
Gnb3	14695	0.425766	0.516037	0.854951	1.57932	1.27254	1.94416	2.66927	0.0129227
Zfp467	68910	0.0540034	0.0350286	0.0619824	0.138765	0.116643	0.14726	2.66642	0.0022954
Gvin1	74558	0.871638	0.800775	0.74186	2.25923	1.98126	2.13337	2.64007	0.000118717
Gm7967	666182	0.0559177	0.0499444	0.0566053	0.180511	0.129349	0.118656	2.63755	0.00989719
Pla2g2c	18781	0.0348805	0.0872041	0.03	0.129808	0.166502	0.104657	2.63647	0.0318243
Cidec	14311	0.03	0.03	0.03	0.0721618	0.0787181	0.0861419	2.63358	0.000264544
6430519N07Rik	101179	0.0479811	0.033006	0.0832374	0.152564	0.14006	0.137424	2.61867	0.00474672
Pla2g2d	18782	0.03	0.03	0.03	0.0706693	0.063513	0.100973	2.61283	0.0135398
Sema3c	20348	0.0614287	0.0419418	0.0819375	0.13747	0.156412	0.188914	2.60537	0.00636752
Gchfr	320415	0.470779	0.237367	0.268179	0.582855	0.86976	1.08517	2.59933	0.0330392
2410137M14Rik	76797	0.03	0.0418087	0.03	0.0808978	0.0767924	0.103215	2.5627	0.00432626
Nr0b2	23957	0.653552	0.94481	1.27187	2.46269	2.96693	1.90888	2.55676	0.0136032
Dnajc5b	66326	0.03	0.03	0.03	0.08037	0.0626016	0.0869158	2.5543	0.00302692
D2hgdh	98314	0.251607	0.465694	0.718382	1.08431	1.50405	1.07722	2.55319	0.0189808
Tcfec	21426	0.0518756	0.0398838	0.0301931	0.129885	0.0909268	0.087058	2.52451	0.014625
Rbp4	19662	0.267576	0.242981	0.24325	0.52561	0.671723	0.704147	2.52251	0.00232451
Igsf1	209268	0.422265	0.454046	0.710345	1.62214	1.24781	1.10013	2.50216	0.0115982
LOC553090	553090	0.0340595	0.0468319	0.0849432	0.131861	0.143564	0.139123	2.49977	0.00611154
Lrrc27	76612	0.87428	1.15872	0.819081	1.88416	2.62768	2.60011	2.4936	0.00586459
Irgm2	54396	1.1851	1.69866	1.49086	2.83896	4.32685	3.65059	2.47253	0.00919336
Gsg1l	269994	0.0647072	0.0534842	0.03	0.122646	0.110158	0.133059	2.46886	0.00398749
Entpd4	67464	0.341578	0.219506	0.283557	0.548561	0.957177	0.566415	2.45329	0.0412705
Eif4e	13684	0.150924	0.352646	0.543573	0.744327	0.974133	0.848286	2.45119	0.0182249
Sardh	192166	0.143397	0.189519	0.243972	0.411141	0.483667	0.518188	2.44934	0.00289422
2510049J12Rik	70291	0.0823828	0.215745	0.194559	0.32411	0.459647	0.40927	2.42147	0.0151194
Mylk3	213435	1.79015	1.40385	1.87586	4.27988	5.04643	2.92436	2.41637	0.0198323
Cngb3	30952	0.114236	0.447468	0.58306	0.739811	0.963363	1.03619	2.39295	0.0324683
Ces3	104158	7.22062	4.83641	4.29958	14.2769	13.3083	11.4393	2.38585	0.00350236
Kctd11	216858	0.0705447	0.03	0.0420437	0.0931637	0.134174	0.112782	2.38532	0.0175127
Lmod3	320502	1.08454	4.06085	5.1415	7.08556	9.36005	8.06692	2.38289	0.0264041
Fbxl22	74165	7.38139	14.4088	6.81424	21.914	22.4398	23.7952	2.38247	0.00625396
Gm12216	622459	0.0897002	0.0998177	0.135386	0.188594	0.264822	0.320359	2.38155	0.0211525
Slc22a1	20517	0.303396	0.192703	0.161	0.375899	0.490349	0.694117	2.37463	0.0425975
Gzmm	16904	0.974886	0.780144	0.691828	1.67126	2.10186	2.02617	2.3701	0.00205281
Ank3	11735	0.03	0.03	0.0410112	0.0711871	0.0965104	0.0712803	2.36585	0.0074692
Hdhd3	72748	0.088591	0.102702	0.179358	0.194007	0.341625	0.331401	2.33921	0.0403011
Gm7609	665378	0.0386192	0.03	0.03	0.0595501	0.0834281	0.0873734	2.33577	0.00866902
2610110G12Rik	73242	0.0588936	0.148183	0.202393	0.34813	0.3641	0.243017	2.33289	0.0322894
Ppp1r14c	76142	1.39009	2.42148	2.88397	5.97567	5.28708	4.30233	2.32469	0.0107831
Gbp2	14469	1.92861	4.01898	2.53501	5.76657	6.12436	7.79609	2.32087	0.0132878
LOC641172	641172	0.03	0.0480974	0.03	0.107482	0.0609687	0.081021	2.30784	0.0331215
C1qtnf9	239126	1.67512	0.817203	0.520414	2.09682	2.22579	2.62106	2.30477	0.0261916
Gvin1	74558	2.43759	3.80794	2.96124	7.06486	5.68785	8.43772	2.30161	0.0108595
Abhd6	66082	0.225215	0.128461	0.230387	0.470094	0.381099	0.491395	2.29871	0.00591525
Gstt1	14871	2.52263	3.64811	4.31233	6.57771	7.63243	9.87756	2.29777	0.0147762
2410066E13Rik	68235	0.0609622	0.0477924	0.0425816	0.151828	0.0943478	0.10139	2.29665	0.0258372
Gm3185	100041181	0.0606073	0.0951894	0.0458849	0.170587	0.162875	0.126185	2.27907	0.0127136
Gm6416	623312	0.242293	0.292404	0.272453	0.476376	0.593821	0.767383	2.27663	0.0160691
Itih2	16425	0.0411727	0.0364818	0.03	0.055076	0.0988608	0.091134	2.27646	0.0299047
Gm2268	100039496	0.136962	0.154174	0.160239	0.267151	0.433569	0.325828	2.27427	0.0176212
Cpxm1	56264	0.124778	0.146689	0.170667	0.215552	0.371883	0.416826	2.27139	0.0398679
Bcat1	12035	0.0537316	0.053015	0.0920279	0.146282	0.189948	0.111744	2.25368	0.033214
BC048355	381101	0.0382366	0.042369	0.0414898	0.0607471	0.104472	0.109568	2.25059	0.0306692
Apln	30878	0.0492286	0.0796094	0.168762	0.239635	0.214794	0.214063	2.24628	0.028416
Gdpd3	68616	0.0532019	0.0523858	0.0528569	0.107362	0.0950783	0.153149	2.24425	0.0204942
L1td1	381591	0.0421508	0.0570818	0.037019	0.093788	0.118604	0.0933742	2.24413	0.00535086
Nrn1	68404	1.49652	1.9283	1.02645	2.97593	3.53569	3.39768	2.22618	0.00421472
Lhpp	76429	0.321559	0.4681	0.576467	1.09969	1.15086	0.788701	2.22472	0.0145274
Epm2a	13853	0.0443214	0.0582397	0.0621206	0.0991965	0.124006	0.141841	2.21666	0.00776516
Tro	56191	0.0569499	0.03	0.0619124	0.110945	0.130097	0.0888986	2.21641	0.0175946
Morn4	226123	0.0601608	0.0625527	0.103888	0.17821	0.154875	0.168768	2.2147	0.00430368
Naa38	76522	1.57605	2.31688	2.01461	3.49501	4.35736	5.22307	2.21335	0.0117066
Lgi1	56839	0.03	0.135757	0.16928	0.260968	0.257151	0.223116	2.21239	0.0361807
Cacna1g	12291	0.0334836	0.03	0.03	0.0647775	0.0655463	0.0747717	2.19392	0.000402792
Myct1	68632	0.747728	0.245367	0.475378	0.977571	0.906096	1.33637	2.19278	0.0413888
Lrrc4b	272381	0.496888	1.37444	2.25344	2.93507	3.4934	2.61406	2.19225	0.0448427
Klhl10	66720	0.03	0.03	0.0413073	0.0692694	0.0828956	0.0696079	2.18911	0.00237375
Iigp1	60440	1.61957	2.20579	1.8173	3.53262	4.94107	3.87791	2.18897	0.00811094
Srpk3	56504	0.426992	1.51124	1.85856	2.60496	3.23455	2.46349	2.18685	0.0379091
Eif2ak2	19106	0.114989	0.158762	0.193287	0.321488	0.355202	0.342613	2.18248	0.00173101
Pde4b	18578	0.0379449	0.069149	0.0510074	0.126827	0.133907	0.0842244	2.18188	0.0256351
Batf2	74481	0.168267	0.217918	0.203143	0.317174	0.440914	0.526324	2.17945	0.0206763
Muted	17828	0.250834	0.348153	0.309588	0.681446	0.732324	0.562331	2.17495	0.00352689
Cpsf2	51786	0.0500242	0.0590354	0.119345	0.183918	0.155156	0.15733	2.17336	0.0194648
A930007D18Rik	77789	0.0557408	0.03	0.0514967	0.1122	0.0767861	0.108901	2.17059	0.0179306
Lypd2	68311	0.259791	0.271359	0.266698	0.70406	0.472799	0.554436	2.16996	0.0101115
Steap4	117167	0.962107	0.798194	0.773456	1.93254	1.68755	1.86975	2.16668	0.000474924
Cryba4	12959	0.548147	0.237644	0.166922	0.71764	0.578863	0.767129	2.16606	0.0463993
A830093I24Rik	207921	0.0693369	0.0583652	0.0545092	0.141373	0.13197	0.121002	2.16421	0.000660948
Gm8096	666422	0.139965	0.0810383	0.117366	0.246848	0.209538	0.275431	2.16278	0.00693103
Ifi203	15950	0.0407441	0.0729019	0.0703561	0.124408	0.112558	0.160912	2.16236	0.0161805
Paqr7	71904	0.19649	0.370336	0.535602	0.61452	0.976354	0.792556	2.16198	0.0406355
Mmp23	26561	0.372132	0.638839	0.566736	0.786922	1.15135	1.47058	2.16063	0.0456416
Nrg2	100042150	0.0744538	0.0347577	0.0504825	0.113289	0.13476	0.0969612	2.16044	0.0177874
Stom	13830	1.48066	1.48974	2.22362	4.4682	4.18928	2.53975	2.15579	0.0370072
Ankrd12	106585	0.240985	0.114629	0.28106	0.441981	0.462631	0.467854	2.15568	0.00845506
Gbp9	236573	0.359455	0.522288	0.4781	0.754337	0.981351	1.19507	2.15522	0.0183954
Ccdc8	434130	0.03	0.0411314	0.03	0.0592082	0.0672453	0.0914308	2.15447	0.0198966
LOC677308	677308	0.0387786	0.0489418	0.03	0.0606001	0.0948062	0.0980753	2.15325	0.0264164
4930534B04Rik	75216	0.347415	0.612474	0.708767	1.28355	1.20407	1.10425	2.15255	0.00588895
Arid3b	56380	0.030826	0.0447022	0.0436115	0.0630879	0.110349	0.0829696	2.15215	0.0336617
Hdac8	70315	0.0990828	0.153432	0.131944	0.2535	0.341003	0.230898	2.14691	0.0166655
Asph	65973	3.40509	7.55554	7.50071	13.8691	12.3206	13.3705	2.14286	0.00830169
Plekha6	240753	0.129306	0.147139	0.2733	0.314297	0.407318	0.456006	2.14212	0.0271947
Psmb8	16913	3.05429	4.52824	3.39342	5.75311	7.81183	9.66943	2.11684	0.0282734
Gm11203	432584	2.02729	1.46716	1.56624	3.35651	3.33902	4.01492	2.1164	0.00259771
Etl4	208618	0.077855	0.110087	0.13686	0.221389	0.191355	0.273249	2.11203	0.0148757
Doc2g	60425	13.2154	16.1441	19.7391	29.5436	35.5195	38.1148	2.10144	0.00467899
Rpl21	19933	0.126502	0.121238	0.161633	0.245488	0.286641	0.327826	2.10067	0.0050726
E130119H09Rik	78550	0.953038	0.988887	0.801926	1.9537	2.09172	1.70535	2.09588	0.00138272
Nt5dc2	70021	0.800434	0.85717	1.34355	2.37186	2.15516	1.74198	2.08886	0.012536
Sfrs13a	14105	0.238228	0.203561	0.350948	0.641506	0.450323	0.560264	2.08404	0.0157122
AI646023	192734	0.03	0.03	0.03	0.0530237	0.065144	0.0693188	2.08318	0.00265561
1110019D14Rik	76311	0.124511	0.154822	0.285005	0.383739	0.378659	0.413209	2.08316	0.0155623
Cst6	73720	2.75351	1.67446	1.30125	3.30531	3.65555	4.93303	2.076	0.0355867
1600029D21Rik	76509	0.0307987	0.0382237	0.03	0.0473788	0.069604	0.0884522	2.07463	0.0433266
Cd79b	15985	0.0344196	0.0919967	0.082755	0.119484	0.140174	0.174219	2.07426	0.0352475
LOC434366	434366	0.0537128	0.0888396	0.0920297	0.148155	0.213214	0.125199	2.07419	0.0446203
Tap1	21354	0.194289	0.414206	0.22484	0.411528	0.661512	0.65366	2.07204	0.04975
Sec62	69276	0.0922556	0.0635273	0.15835	0.245909	0.177304	0.226807	2.06925	0.032156
Dnaja1	15502	0.0695103	0.0534676	0.110677	0.16463	0.166884	0.151465	2.06706	0.00934565
Tcl1b2	27381	0.0362317	0.03	0.03	0.0694945	0.0645839	0.0646708	2.06532	0.000204215
Lynx1	23936	0.0902657	0.110265	0.0892673	0.151446	0.267002	0.178619	2.06029	0.0449531
Cdc42ep2	104252	2.09475	2.52892	2.70781	5.0969	5.13077	4.873	2.0597	0.00020191
Tmem82	213989	1.23037	0.589355	0.557985	1.56878	1.61492	1.71314	2.05947	0.0197344
Nmb	68039	1.55442	2.1951	1.5624	2.66006	3.84763	4.41343	2.05597	0.0286357
Lin7b	22342	0.0451121	0.0636755	0.074683	0.108546	0.115461	0.153162	2.05575	0.0167628
Gpt	76282	1.6195	2.86874	2.72603	3.94331	6.47704	4.33981	2.04597	0.0460609
Ccrl1	252837	0.213826	0.266741	0.145966	0.343875	0.433249	0.504406	2.04543	0.0198389
Bmp7	12162	0.03	0.03	0.03	0.067143	0.062766	0.0539885	2.04331	0.0012671
Hdac8	70315	0.0812335	0.0713752	0.0900052	0.173469	0.193362	0.126971	2.03535	0.014786
Ddx5	13207	0.708085	0.295154	0.453973	1.04564	1.08926	0.827882	2.03318	0.0257384
LOC100048512	100048512	0.03	0.039986	0.03	0.0661771	0.0701247	0.0668388	2.03169	0.000632665
Hsph1	15505	0.959348	0.522049	0.639059	1.64388	1.18787	1.47444	2.03079	0.0174533
Stx2	13852	0.213064	0.147113	0.226738	0.366492	0.381156	0.444113	2.03055	0.0041508
Gm7447	665009	1.37104	0.950361	1.04426	2.24539	2.16693	2.4212	2.03037	0.00145021
Gm3646	100042065	2.13755	4.1509	3.24336	5.17288	5.88414	8.2875	2.02947	0.0418409
Asb12	70392	0.118036	0.105192	0.129074	0.2564	0.255826	0.202038	2.02742	0.00333926
6330418K02Rik	69004	0.0566592	0.0560971	0.0963952	0.110986	0.179696	0.132937	2.02541	0.0420963
Ssbp1	381760	0.057722	0.046547	0.0657739	0.0874728	0.112146	0.143781	2.01949	0.0284336
LOC100048512	100048512	0.150694	0.191794	0.17223	0.24611	0.395677	0.396821	2.01782	0.0274005
Obscn	380698	9.62724	13.2907	12.6576	23.3502	27.8277	20.4751	2.01411	0.0076505
Epb4.1l2	13822	0.209295	0.145201	0.190134	0.414068	0.352817	0.329112	2.01237	0.00437306
Pdgfc	54635	0.116137	0.167067	0.278599	0.332597	0.388607	0.40807	2.01009	0.023454
Dok2	13449	0.216256	0.288919	0.386885	0.510796	0.664666	0.617216	2.00959	0.0110876
Pdzd3	170761	0.104468	0.21293	0.184897	0.30124	0.29453	0.411351	2.00504	0.0279999
Ccrl1	252837	0.525306	0.775484	0.417856	0.986971	1.11286	1.34594	2.00493	0.018196
Ddah1	69219	0.0629119	0.0998921	0.112716	0.178427	0.18814	0.185215	2.00269	0.00375153
Phgdh	236539	0.315054	0.17825	0.17305	0.489752	0.343928	0.499309	2.00042	0.031524
Wipi1	52639	0.938546	1.20659	1.08575	2.11185	2.31843	2.03199	2.00016	0.000730571
Gm7120	633640	0.0601708	0.03	0.0351435	0.0915902	0.0838047	0.0751719	1.99951	0.0162229
C8g	69379	0.227113	0.32815	0.379608	0.556194	0.756212	0.556427	1.99903	0.0178787
2610110G12Rik	73242	0.03	0.03	0.03	0.0793068	0.042018	0.0585845	1.99899	0.0498987
Cd1d2	12480	0.111412	0.132581	0.177325	0.290755	0.349887	0.201215	1.99815	0.0416186
Gm2881	100040649	0.172668	0.0621083	0.134076	0.257426	0.256104	0.222956	1.9967	0.0233261
BC065397	436230	0.0405427	0.03	0.069753	0.0963652	0.0809683	0.102331	1.9934	0.0261794
Polr1e	64424	1.22119	1.83416	1.87376	2.55013	3.40522	3.85918	1.99114	0.0205187
LOC674373	674373	1.60652	2.49318	2.53061	4.48196	4.61538	4.09073	1.98905	0.0030282
Cyb5d1	327951	0.0834067	0.0453508	0.0881087	0.13042	0.18495	0.1156	1.98726	0.0464793
Mras	17532	0.03	0.0477773	0.0619139	0.075203	0.0975564	0.1048	1.98695	0.0231221
9630023C09Rik	320378	0.0334549	0.0365113	0.0309329	0.0648986	0.0697684	0.0656377	1.9852	0.000115883
C8g	69379	0.208709	0.272243	0.297977	0.436784	0.638127	0.471335	1.98509	0.0193616
Thbs4	21828	0.684937	0.808469	0.537098	1.03339	1.43955	1.5524	1.98243	0.0194824
Phgdh	236539	0.315426	0.228639	0.192549	0.506293	0.425186	0.52843	1.98192	0.00742978
Nars	70223	1.14184	1.21615	1.10963	2.10664	2.24671	2.51756	1.98145	0.000808775
Erp29	67397	1.44114	1.67476	1.51333	2.79397	3.20007	3.1774	1.9812	0.000524802
Gm5246	383450	0.101989	0.0737991	0.0635845	0.162596	0.12563	0.185782	1.98021	0.0202235
Fap	14089	0.350554	0.4528	0.551385	0.698468	0.869796	1.11245	1.97877	0.0295351
Irf7	54123	0.725859	1.00933	0.81495	1.32054	1.99595	1.72815	1.97819	0.0176083
2310046A06Rik	69642	5.19476	7.70968	8.49319	13.6854	13.6204	15.0184	1.97799	0.00310632
Gadd45gip1	102060	0.0551935	0.04615	0.0635955	0.119973	0.112471	0.093496	1.97613	0.00456749
Anxa3	11745	3.62836	1.96935	2.25333	4.63451	4.75573	6.11657	1.97513	0.0217237
Gpsm1	67839	1.79241	1.43215	1.52991	2.99131	3.72745	2.65427	1.97141	0.0100248
Gamt	14431	0.320129	0.338203	0.510375	0.626762	0.848818	0.823299	1.96703	0.0153111
Trit1	66966	0.162708	0.179981	0.195968	0.286064	0.422636	0.348489	1.96264	0.0131093
Reep6	70335	0.0752072	0.0733649	0.0783929	0.174838	0.172623	0.0976699	1.96123	0.0458086
Gbp3	55932	1.13926	2.58739	1.27516	2.92343	2.96576	3.91656	1.96044	0.0469515
Rab17	19329	0.0618473	0.0895586	0.108359	0.158665	0.218375	0.132061	1.95985	0.0450881
Lgi3	213469	0.03	0.0667532	0.0855342	0.12154	0.13933	0.0963074	1.95942	0.0469316
Slc7a7	20540	0.470235	0.422623	0.391204	0.638621	0.985177	0.889967	1.95767	0.0179799
Cmpk2	22169	0.391973	0.249143	0.336528	0.745726	0.593534	0.57241	1.95538	0.0105199
Il17d	239114	0.209933	0.223338	0.169773	0.362431	0.364484	0.452087	1.95508	0.00466432
LOC100046290	100046290	0.0489346	0.0824469	0.063559	0.159184	0.114862	0.106911	1.95422	0.030657
1810010H24Rik	69066	0.0641791	0.120837	0.142707	0.194491	0.261032	0.183418	1.94964	0.0369564
Dhrs7c	68460	6.61725	12.8355	14.0814	18.7695	22.482	23.916	1.94332	0.0190272
Gm5666	435373	0.248042	0.363743	0.209365	0.542335	0.621348	0.430682	1.94162	0.0233593
Tagln3	56370	0.0736026	0.03	0.0413502	0.0904824	0.0878398	0.103051	1.94114	0.0305938
2410066E13Rik	68235	0.0651135	0.03	0.0410683	0.0685141	0.0888424	0.106937	1.94074	0.0482082
Adamts17	233332	0.0323459	0.03	0.0380746	0.0600472	0.0538836	0.0805839	1.937	0.0203861
Il17d	239114	0.525082	0.555316	0.491554	0.830023	0.941551	1.26922	1.9344	0.0212223
6530418L21Rik	109050	0.188014	0.0956561	0.162532	0.21679	0.340782	0.304574	1.93218	0.0393228
Rgs6	50779	0.244298	0.2194	0.257182	0.461801	0.491551	0.438664	1.931	0.000291735
Nmb	68039	1.29945	1.77008	1.27412	1.92774	3.04258	3.41166	1.92971	0.0469562
Gm9640	675363	0.316492	0.275615	0.262987	0.474111	0.552559	0.623365	1.92965	0.00451618
Lbh	77889	1.25977	1.56705	1.70935	2.76534	2.72096	3.26587	1.92942	0.00304995
BC026762	236428	0.207085	0.241235	0.238179	0.491165	0.432163	0.400806	1.92882	0.00176125
Fkbp4	14228	7.81548	7.5142	8.88692	15.755	15.7793	15.1048	1.92592	9.25447e-05
Icam4	78369	0.113732	0.193415	0.217457	0.307816	0.412062	0.289686	1.92443	0.0306479
Fggy	75578	0.199902	0.214989	0.255318	0.402151	0.523192	0.362603	1.92171	0.0156981
Cma1	17228	0.23514	0.465117	0.166881	0.555148	0.503488	0.607436	1.92135	0.048756
Gm3367	100041489	0.0612189	0.111377	0.0959328	0.173744	0.150226	0.19113	1.91823	0.0123573
Gsg1l	269994	0.121864	0.192334	0.118883	0.272095	0.319153	0.239183	1.91749	0.0165767
I830012O16Rik	667370	0.453565	0.495625	0.669141	0.854137	1.10722	1.13765	1.91494	0.0114464
Dnmt3a	13435	0.633	0.706586	1.31508	1.98367	1.32302	1.77487	1.9142	0.0498626
Airn	104103	0.03	0.03	0.0512922	0.070987	0.0694084	0.0725377	1.91328	0.00906778
Ankrd37	654824	0.57068	0.828342	1.3899	1.92562	1.50193	1.90646	1.91257	0.0381811
Col14a1	12818	0.169983	0.214154	0.237109	0.299337	0.476272	0.41239	1.91228	0.0269542
Tmem116	77462	0.326001	0.359743	0.434268	0.611126	0.825972	0.703423	1.91116	0.00826696
2310034G01Rik	75579	0.0815721	0.0901897	0.110456	0.141046	0.210222	0.186948	1.90709	0.0179993
LOC100047435	100047435	15.2929	19.2246	17.4825	28.8181	36.1831	34.0748	1.90531	0.00313453
Clec11a	20256	0.0498481	0.0497736	0.0574534	0.121728	0.0847229	0.0926231	1.90402	0.0148187
Osgep	66246	4.01157	4.06637	4.12378	6.82549	8.27784	8.12767	1.90391	0.00135386
Dact3	629378	0.720865	0.691122	0.748756	1.34494	1.02588	1.74163	1.90326	0.0351048
Gm13337	637235	0.316324	0.202067	0.186987	0.458119	0.368127	0.515127	1.90164	0.0230776
Fam84b	399603	0.0496749	0.03	0.0508728	0.0882218	0.0944518	0.0655529	1.90142	0.0240464
Epor	13857	0.177777	0.27408	0.335884	0.504375	0.552782	0.440015	1.90059	0.0137896
Tnip3	414084	0.224378	0.21561	0.282022	0.42463	0.489545	0.45805	1.90056	0.00150461
4833424O15Rik	75769	0.03	0.03	0.03	0.0496373	0.056092	0.0651931	1.89914	0.00393497
H2-Q8	15019	0.628409	0.667262	0.584552	0.972466	1.18454	1.41372	1.8991	0.0121861
Gm8572	667317	6.89676	6.83689	5.31834	8.72459	12.5046	14.9134	1.89705	0.0383852
Mamdc4	381352	0.049237	0.03	0.0606489	0.0826102	0.0837977	0.0989594	1.89703	0.0157232
P2rx6	18440	0.0682108	0.10712	0.0987698	0.165913	0.19847	0.155053	1.89505	0.00970114
Ifngr2	15980	4.3629	6.9357	7.59276	11.399	12.2463	12.1244	1.89345	0.00528072
Sorcs2	81840	0.107847	0.137321	0.162124	0.227315	0.274098	0.269217	1.89208	0.00496962
Gm3806	100042368	10.4129	15.8341	22.5371	31.1627	34.3092	26.7994	1.89142	0.0246276
Tmem106c	380967	0.250087	0.362257	0.408319	0.59231	0.692307	0.643075	1.88867	0.00538979
Fgl1	234199	0.0984807	0.0601732	0.0686276	0.117324	0.153374	0.15766	1.8847	0.0178619
Slc31a2	20530	0.948264	0.813372	0.810751	1.52583	1.8188	1.50067	1.88358	0.00247039
Gmpr	66355	3.31881	6.57117	6.3738	10.9825	11.4722	8.17174	1.88311	0.0312806
Fmo1	14261	2.79599	1.61235	1.84506	3.5457	4.374	3.85494	1.88292	0.0133912
Gm9210	668506	0.322836	0.186467	0.18417	0.434079	0.382806	0.488288	1.88208	0.0207488
LOC630233	630233	0.254926	0.233913	0.30231	0.625063	0.386521	0.476124	1.88044	0.0327499
Col6a6	245026	0.03	0.034072	0.0451299	0.0571234	0.0741399	0.0740709	1.88032	0.0114793
Ptpn22	19260	0.0394855	0.0400516	0.0334011	0.0737375	0.0538146	0.0848041	1.88029	0.0236232
Tuba4a	22145	18.0002	49.9287	46.7678	68.2417	76.5198	70.6593	1.87818	0.0325009
Mettl11b	240879	0.03	0.03001	0.03	0.0622072	0.0414089	0.0653449	1.87714	0.0248058
Vcam1	22329	2.14469	2.57657	2.60155	3.28997	4.62655	5.8142	1.87506	0.0454324
Chid1	68038	0.738092	0.867045	1.07561	1.49935	1.87649	1.65025	1.87488	0.00604814
Jhdm1d	338523	0.142359	0.0934324	0.133704	0.277791	0.240287	0.174511	1.87442	0.0331515
Mapk8	26419	0.100116	0.104063	0.150704	0.245474	0.206554	0.21251	1.87256	0.00700604
Sec31b	240667	0.161145	0.134813	0.157761	0.293082	0.252154	0.30375	1.87117	0.00176476
Tcf21	21412	2.11072	1.5386	1.77366	2.76973	3.47518	3.89978	1.87068	0.0130008
Tha1	71776	0.137702	0.143617	0.137341	0.25298	0.262492	0.267652	1.87055	1.39318e-05
Prelid2	77619	0.412593	0.641454	0.622354	0.797578	1.06676	1.27009	1.86974	0.0351649
Zbp1	58203	0.0319067	0.0668799	0.0465063	0.105901	0.0965778	0.069006	1.86853	0.0487664
Mtr	238505	1.46668	1.08946	1.26904	2.487	2.34681	2.3121	1.86812	0.00080126
3110021A11Rik	67289	0.0661881	0.0595295	0.13265	0.142219	0.163494	0.17685	1.86774	0.0424334
Agmat	75986	0.0311186	0.0569213	0.0503688	0.0841816	0.07008	0.10411	1.86673	0.0333041
Mylk3	213435	11.1134	9.82331	12.2058	20.176	23.6675	18.0173	1.86651	0.00582729
Pdgfrl	68797	0.74585	0.925511	0.825027	1.15688	1.51223	1.98508	1.86437	0.0427965
Wfdc1	67866	0.521172	0.993775	1.34839	1.90983	1.74071	1.68592	1.86372	0.0295981
Osgep	66246	4.87155	5.27538	6.06062	10.566	10.1339	9.44122	1.8597	0.0006318
Nln	75805	0.173813	0.18247	0.271412	0.425157	0.414668	0.326826	1.85863	0.0151759
Ptma	19231	0.0334593	0.03	0.03	0.0430301	0.0550147	0.0753429	1.85522	0.0486056
Gm8341	666875	0.166439	0.11032	0.145596	0.279049	0.204978	0.298645	1.85311	0.021739
Rnaseh2a	69724	0.038702	0.0353513	0.0541723	0.0743655	0.0820834	0.0807715	1.85002	0.00440391
Pik3r3	18710	0.615229	0.453167	0.672908	0.999349	1.0064	1.20856	1.84592	0.00666758
H2-K1	14972	22.1235	25.1134	23.4731	32.6758	47.5754	50.1508	1.84418	0.0225982
Epha7	13841	0.121348	0.0998788	0.194364	0.278927	0.267059	0.22042	1.84414	0.0256166
BC026585	226527	0.199961	0.290572	0.344688	0.41402	0.613049	0.512248	1.843	0.0301672
Skp2	27401	0.0541516	0.03	0.0493401	0.0688563	0.0804591	0.095959	1.83738	0.0258649
Pdxk-ps	435518	0.0625756	0.0801423	0.0771173	0.132208	0.168233	0.103283	1.83648	0.0350232
Ttl	69737	0.208183	0.253228	0.320083	0.437294	0.515857	0.48165	1.83597	0.00536611
Tnnc1	21924	250.569	433.435	328.598	565.697	584.207	706.487	1.83329	0.0151263
2010001E11Rik	72045	0.0326883	0.0337866	0.0362217	0.0641097	0.0648337	0.0592644	1.83266	0.00015111
Ogn	18295	10.3105	13.7161	14.192	23.5897	20.4376	25.9962	1.83218	0.00631503
Crip3	114570	0.0443498	0.0700586	0.0763445	0.136375	0.113529	0.099445	1.83142	0.022072
2009-09-06	56526	0.13827	0.149767	0.151813	0.266886	0.265254	0.272831	1.83011	1.44004e-05
Mgmt	17314	1.84556	1.88848	2.26747	3.30256	3.6796	3.99924	1.82977	0.00236105
Acrbp	54137	0.109161	0.0640736	0.0805786	0.153028	0.151174	0.159918	1.82859	0.00643896
2810055F11Rik	67217	0.439019	0.561066	0.76942	1.07607	1.20099	0.956314	1.82727	0.0150812
Mdga1	74762	0.0375049	0.0417771	0.03	0.0749202	0.0624354	0.062187	1.82594	0.00519842
Grb10	14783	0.0599729	0.0338112	0.0741577	0.110986	0.114103	0.0814274	1.82513	0.0426871
Gm9252	668576	0.327912	0.212651	0.182544	0.423287	0.363042	0.53218	1.82339	0.040422
Evpl	14027	0.069956	0.118197	0.11396	0.156017	0.193468	0.20121	1.82281	0.0163471
Galt	14430	0.0757671	0.0924038	0.0912224	0.128429	0.177874	0.166039	1.82095	0.0109795
Neil1	72774	0.13598	0.179301	0.220874	0.297482	0.381954	0.296035	1.81938	0.0174892
Nrg2	100042150	0.0323232	0.03	0.03	0.057738	0.0566929	0.0534953	1.81889	7.21742e-05
Nes	18008	0.779929	0.769803	0.840545	1.28273	1.28005	1.78409	1.81856	0.0181674
Uqcc	56046	7.03508	7.49008	7.21546	13.0592	14.83	11.6179	1.8172	0.00322227
LOC630285	630285	18.9109	23.4674	18.9729	27.3092	39.3646	44.7898	1.81681	0.0360831
Esd	13885	0.0510259	0.0514397	0.0312776	0.0770769	0.0881631	0.077648	1.81608	0.00859544
Serpinf1	20317	1.82771	1.79479	1.58336	2.66355	3.50893	3.27144	1.8141	0.00581036
Ifi47	15953	2.0408	3.50368	2.13464	4.78788	4.10508	5.0376	1.81408	0.0191526
2310016G11Rik	69578	0.18978	0.212238	0.17531	0.299588	0.409147	0.338533	1.81399	0.00979026
Tapbpl	213233	0.70009	0.673485	0.592047	1.05545	1.17352	1.33351	1.81239	0.00359609
Fam117a	215512	0.338527	0.201834	0.255515	0.458961	0.448645	0.533958	1.81129	0.0109542
Efnb3	13643	3.64658	3.71661	3.96787	8.35725	5.64687	6.50586	1.81007	0.0191401
Ppnr	26930	0.142593	0.17999	0.157628	0.278896	0.298888	0.291204	1.8096	0.000462822
D0H4S114	27528	0.368583	0.430528	0.585529	0.710104	0.772181	1.0233	1.80956	0.0317842
Iigp1	60440	2.15964	3.06586	2.53609	4.29675	5.12613	4.61293	1.80837	0.00423974
Sun1	77053	0.086154	0.0463763	0.0480819	0.119855	0.117803	0.0888558	1.80782	0.0412849
Gm5536	433580	2.36664	4.57015	4.9087	7.41012	7.59673	6.40382	1.80749	0.0222005
Ifit3	15959	1.69724	2.17061	2.46844	3.10399	3.87581	4.47121	1.80721	0.0200033
Brwd3	382236	0.03	0.03	0.03	0.0605819	0.0392046	0.062808	1.80661	0.0324029
Lrrc39	109245	0.0579695	0.088863	0.0840162	0.146529	0.155065	0.115243	1.80567	0.0159427
Tecr	106529	25.0943	25.364	24.5037	48.1477	46.9702	40.0903	1.80369	0.00135461
Pola2	18969	0.580385	0.507567	0.75986	0.913879	1.21885	1.19717	1.80208	0.0161618
Nicn1	66257	0.944694	1.09635	1.47941	2.03491	2.34934	1.9593	1.80191	0.00910224
Tmx2	66958	1.50685	2.10016	2.1211	3.04804	3.74514	3.49655	1.79635	0.00606595
Tbxa2r	21390	0.234732	0.15816	0.220966	0.277043	0.379062	0.446586	1.79633	0.0406194
Mrpl15	27395	0.260657	0.40889	0.567829	0.707076	0.781092	0.734169	1.79601	0.0228287
Ecm2	407800	0.319592	0.343729	0.409087	0.530329	0.579178	0.816134	1.79562	0.0367868
Slc1a3	20512	0.03	0.03	0.0457733	0.0497688	0.0668832	0.0730125	1.79312	0.0326737
Cmbl	69574	6.46787	9.20438	12.2111	17.9362	18.2962	13.7243	1.79163	0.0293155
Polr1e	64424	1.37908	1.94054	1.70148	2.65506	2.88521	3.44982	1.79046	0.0099236
Glrp1	14659	0.03	0.0550277	0.0534152	0.0756024	0.0810686	0.0910199	1.78912	0.0170729
Bcorl1	320376	0.0825394	0.0614802	0.0677121	0.147994	0.0948724	0.135776	1.78831	0.0320293
LOC100047388	100047388	13.2048	16.0294	12.9851	19.2956	25.4701	30.7196	1.78793	0.0322861
Gm7669	665516	0.465877	0.325383	0.311302	0.683478	0.567923	0.719884	1.78791	0.0126376
Gpr27	14761	0.16484	0.181858	0.225071	0.319667	0.350545	0.351973	1.78776	0.00195176
Smtn	29856	3.17084	3.61255	3.94989	7.12172	6.19059	5.86857	1.78705	0.00301628
Ckb	12709	1.11095	2.03239	1.71017	2.37693	3.50367	2.7853	1.78549	0.0405724
ENSMUSG00000068790	545007	0.359079	0.511027	0.357999	0.68511	0.639184	0.86828	1.78533	0.0205275
1110008J03Rik	100764	0.560497	0.587677	0.512375	0.895235	1.15245	0.910293	1.78133	0.00740085
Rps15a	267019	0.03	0.03	0.0418041	0.0640966	0.0649689	0.0520652	1.77921	0.00991178
Usp18	24110	0.235619	0.198246	0.352899	0.399648	0.493486	0.506549	1.77904	0.0237061
LOC100048372	100048372	0.22181	0.156461	0.190953	0.308926	0.293918	0.409723	1.77886	0.0226092
Nudt8	66387	15.42	19.4066	15.2442	26.5087	31.1154	31.3347	1.77666	0.00337163
Tmc7	209760	0.0348426	0.03	0.03	0.0631993	0.0434824	0.0615953	1.77428	0.0199198
Pgpep1	66522	0.537385	0.328578	0.539517	0.745813	0.940154	0.805616	1.77276	0.0161469
Fam114a1	68303	0.664014	0.726279	1.04197	1.28629	1.31836	1.70398	1.77145	0.0246058
Samd9l	209086	1.16254	0.995099	1.64852	2.3758	1.84078	2.52086	1.77014	0.0265433
Mtap1b	17755	0.0741646	0.0707485	0.0776039	0.135366	0.126973	0.131154	1.76837	5.34055e-05
Casc1	320662	0.168005	0.260589	0.176239	0.329578	0.445072	0.292132	1.76376	0.0481065
5830427D02Rik	76042	0.0993923	0.110518	0.132489	0.182063	0.189839	0.231173	1.76132	0.00860712
Entpd5	12499	1.91646	3.3671	3.45656	5.60532	5.50603	4.28022	1.76102	0.0278274
Cux2	13048	0.265511	0.208195	0.24985	0.41505	0.340219	0.517326	1.75881	0.0277202
Ptpn7	320139	0.0356297	0.03	0.0389051	0.0545896	0.0702155	0.0589267	1.75761	0.00776604
Gm9054	668224	0.0780491	0.123684	0.10645	0.178203	0.193956	0.169094	1.75627	0.00685959
Ncbp2	68092	1.21505	0.681763	1.1287	1.7096	1.63756	1.96601	1.75612	0.0168008
ENSMUSG00000068790	545007	0.982374	1.54045	0.975938	2.1475	1.64788	2.34575	1.75523	0.03447
LOC677149	677149	4.78977	5.37252	4.85243	7.18884	9.52375	9.63143	1.75455	0.00990509
Pla2g5	18784	0.884775	1.84711	1.37372	2.468	2.43735	2.29691	1.75425	0.0217625
Gm5458	432825	0.300855	0.472072	0.25439	0.610972	0.5747	0.61591	1.75368	0.0186785
LOC100045787	100045787	0.192795	0.119855	0.257654	0.295177	0.358006	0.346379	1.75268	0.0318325
Btrc	12234	0.206536	0.234649	0.293528	0.486652	0.376737	0.424315	1.75266	0.0107322
Tst	22117	0.998365	1.16569	1.1856	1.78443	2.19768	1.88676	1.75209	0.00365906
Pgam1	18648	7.77609	5.95424	5.81736	10.4178	11.8487	11.9698	1.75142	0.00368246
Ap3m1-ps	544716	0.0581527	0.0511182	0.0941022	0.116466	0.105466	0.134053	1.7504	0.0316718
Synm	233335	0.331469	0.242986	0.303857	0.467606	0.482725	0.58687	1.75018	0.00861213
Ankmy2	217473	0.174936	0.19815	0.246563	0.41995	0.382819	0.279999	1.74739	0.0301219
Zfp449	78619	0.10394	0.104127	0.158579	0.2124	0.212159	0.21579	1.74651	0.00745118
LOC100047435	100047435	7.7216	6.57542	8.17572	13.4561	14.7738	11.0011	1.74571	0.00972677
Rnf207	433809	1.9982	4.11101	4.63945	5.94213	7.02178	5.79524	1.74525	0.0405703
Ehbp1	216565	0.101777	0.129141	0.128133	0.197697	0.257712	0.170871	1.74427	0.0306133
Dnase1l2	66705	0.0779926	0.0982977	0.0794346	0.132771	0.161303	0.151746	1.74336	0.00398238
Tgm3	21818	0.426437	0.64149	0.695603	1.18721	1.04865	0.838245	1.74315	0.0286811
Cd274	60533	0.301613	0.513272	0.34241	0.668495	0.563109	0.78402	1.74167	0.0346604
Lekr1	624866	0.151712	0.193347	0.219558	0.275222	0.35977	0.348006	1.741	0.0134192
Cxx1a	66158	1.4206	2.04675	2.28842	3.20648	3.35608	3.4509	1.73973	0.00612087
Lhpp	76429	1.11845	1.77993	2.22913	3.19587	3.24417	2.47789	1.73923	0.0360003
Bcs1l	66821	2.11659	2.37451	2.36619	3.51293	4.24789	4.16453	1.73908	0.00240089
Lix1	66643	0.158015	0.305993	0.329507	0.425792	0.536255	0.417592	1.73864	0.0413915
Tubb5	22154	7.49571	8.86079	9.59689	13.2099	14.689	17.1883	1.73724	0.00831802
Mapkapk5	17165	7.53203	7.91818	6.71642	11.337	12.2429	14.9217	1.73691	0.00861064
Gm3923	100042602	0.0931317	0.157069	0.157946	0.192731	0.245542	0.26972	1.73465	0.0329879
Cxx1c	72865	0.12046	0.102923	0.118409	0.154904	0.229726	0.207635	1.73282	0.0217723
Gm10105	100042442	0.618496	1.09316	1.0994	1.35939	1.88657	1.62506	1.73281	0.0356288
Atp1a2	98660	9.95978	7.16665	7.62268	13.9614	14.9814	13.9154	1.73171	0.00293386
Gsto2	68214	0.557875	0.614481	0.798745	1.11556	1.13501	1.16145	1.73102	0.00289414
Slc31a2	20530	2.31615	2.12806	1.91752	3.7301	3.90633	3.36167	1.72879	0.00143973
Pigg	433931	0.0629287	0.0487874	0.0656929	0.103308	0.125911	0.0774556	1.72863	0.0448735
Mtg1	212508	1.09809	1.20266	1.11416	2.06799	2.06586	1.7688	1.72849	0.00136824
Angptl2	26360	0.373956	0.592579	0.629437	0.793689	0.974067	0.990011	1.72796	0.018905
Tceal8	66684	1.7447	1.85453	2.78287	3.17813	3.84035	4.00559	1.72734	0.0203464
Hsph1	15505	2.36368	1.39444	1.53931	3.21209	2.52321	3.41435	1.72719	0.0337902
Ppt1	19063	1.31736	1.47594	1.31977	2.21273	2.8799	2.00951	1.72672	0.0205334
Adamts7	108153	0.0706769	0.0571222	0.0785019	0.129924	0.140109	0.0855657	1.72369	0.0495742
Gimap4	107526	1.61972	1.29118	1.66436	2.25281	2.35835	3.266	1.72168	0.0324611
Zmynd12	332934	0.03	0.03	0.03	0.043181	0.054524	0.057085	1.71989	0.0072055
Cxx1c	72865	0.99164	0.913926	0.825226	1.36874	1.70144	1.62536	1.71948	0.00420193
Spata17	74717	0.0306369	0.0579991	0.0506095	0.0695215	0.0857645	0.0840761	1.71899	0.0259688
Mboat1	218121	0.0652068	0.0637802	0.104891	0.159327	0.123298	0.119312	1.71858	0.0390563
H2-T9	15051	1.57259	1.65312	1.34515	2.12152	2.47247	3.26085	1.71846	0.0350463
Paqr9	75552	0.457148	0.579684	0.808382	1.03403	1.22417	0.912469	1.71832	0.032264
U2af1l4	233073	5.09258	6.15546	5.2893	8.23309	10.0611	10.1048	1.71727	0.00478481
Mettl3	56335	0.281846	0.159143	0.276307	0.428203	0.449365	0.354062	1.71705	0.025493
Lrrk1	233328	0.362662	0.309216	0.380314	0.505987	0.529955	0.770626	1.71696	0.0447911
Baz1b	22385	0.441217	0.250403	0.360245	0.689351	0.640989	0.475082	1.7164	0.0421132
2700081O15Rik	108899	0.405529	0.303625	0.340647	0.597261	0.519028	0.684365	1.71523	0.01127
Acvr1b	11479	0.433262	0.436979	0.449831	0.705134	0.864041	0.690936	1.71211	0.00491464
Gm5643	434858	5.7954	11.6318	11.3763	15.6003	17.8811	15.8272	1.7119	0.0284601
Kbtbd12	74589	0.474825	0.46805	0.396456	0.754373	0.933583	0.604324	1.71151	0.0320516
Fert2	14158	0.419747	0.410369	0.567836	0.726937	0.835652	0.829307	1.711	0.0059043
Angptl6	70726	0.662401	0.724981	0.787607	1.18474	1.15914	1.37746	1.71097	0.0026931
Dpt	56429	2.08804	2.7168	2.26596	3.40104	4.39051	4.30476	1.71074	0.0103695
Oas1a	246730	0.163132	0.236292	0.323369	0.3751	0.433472	0.427094	1.70957	0.0265788
Islr	26968	1.07219	1.53551	1.65221	2.62812	2.39734	2.24651	1.70707	0.00862513
Gm10124	100042611	0.620907	0.866331	0.71807	1.06557	1.24421	1.45138	1.7055	0.0172727
Plekhb2	226971	1.06222	0.741069	0.951762	1.70955	1.8415	1.14753	1.70544	0.0496077
Ak2	11637	0.464388	0.451256	0.385348	0.672351	0.839666	0.706196	1.70502	0.00569504
Kcnip2	80906	3.72733	3.70684	3.724	6.875	7.06428	5.08343	1.70482	0.0142183
Gm4386	100043358	0.740081	0.691622	0.620677	1.1113	1.10733	1.27567	1.70256	0.00182654
Tmem164	209497	3.56487	2.45981	2.4703	4.65156	5.63197	4.17245	1.70171	0.0244812
Reep1	52250	0.36052	0.460558	0.500896	0.700593	0.74883	0.799428	1.70113	0.00362777
Klhl6	239743	0.545393	0.485443	0.689218	0.772296	1.03065	1.12289	1.70102	0.0294067
9130019O22Rik	78921	0.109067	0.0653721	0.115513	0.153187	0.180701	0.159237	1.70071	0.0191136
Naa30	70646	0.454301	0.451834	0.600008	0.935759	0.721036	0.904563	1.70061	0.013278
1810058I24Rik	67705	0.0515752	0.0659243	0.105259	0.143342	0.120357	0.115125	1.7006	0.0462824
Stom	13830	7.72275	8.17946	10.0806	15.7194	14.1048	14.3555	1.70035	0.00231416
Fam132a	67389	0.756011	1.28719	1.15551	1.67436	2.02596	1.73664	1.69974	0.0180506
Dcps	69305	0.948728	1.4175	1.5359	1.80164	2.26398	2.56279	1.69867	0.03322
Chek2	50883	0.173826	0.16421	0.183218	0.218931	0.31103	0.355088	1.69792	0.0401297
Ube2n	93765	0.366616	0.362754	0.632016	0.773638	0.664344	0.872944	1.69748	0.0422859
Gm3020	100040880	0.309799	0.450819	0.316615	0.592344	0.505052	0.730469	1.69681	0.0353834
AI415730	107166	0.243095	0.193952	0.315704	0.398102	0.424832	0.453621	1.69585	0.0108488
Smarcd2	83796	0.618118	0.536472	0.523606	0.871714	0.964894	1.00742	1.69469	0.00145697
Tst	22117	1.85217	2.18522	2.13811	3.07319	4.06335	3.32161	1.69349	0.010574
2310003L22Rik	69487	0.941941	0.894042	0.821087	1.44451	1.64078	1.41371	1.69322	0.00150069
Icam2	15896	6.45125	7.41926	8.25031	10.3415	12.2452	14.8647	1.69304	0.0222965
Ndufaf3	66706	7.2557	10.8248	10.0236	13.3933	17.5005	16.6679	1.69234	0.0172768
Tmx2	66958	5.79687	7.97584	7.50943	11.1555	12.3987	12.4544	1.69197	0.00335816
Psme2	19188	8.99348	12.1952	10.5323	15.8822	17.7423	20.0357	1.69163	0.008494
1700020C11Rik	67900	10.5073	12.4395	10.7204	18.2722	18.8324	19.8299	1.6911	0.000526563
Nlrp1a	195046	13.6137	17.4046	14.5134	23.7358	25.4647	27.7782	1.69066	0.00305328
G630090E17Rik	100041085	0.191255	0.189095	0.216709	0.32242	0.361782	0.325107	1.69047	0.000890907
Gm1673	381633	0.419233	0.466508	0.405879	0.570444	0.735498	0.877429	1.69041	0.0304639
Plcg2	234779	0.428892	0.415624	0.448688	0.606318	0.684518	0.894912	1.69018	0.0265056
Gm3380	100041510	0.25965	0.260655	0.238079	0.413002	0.45309	0.415285	1.68961	0.000308351
Uba7	74153	0.939955	1.57487	1.65051	1.98612	2.56389	2.48759	1.68957	0.0296186
Tubb4	22153	0.759979	0.894974	0.919207	1.22607	1.53459	1.58619	1.68865	0.00858787
Nacc2	67991	0.0448505	0.03	0.0309193	0.0690478	0.0643004	0.0452414	1.68847	0.0495976
Kctd10	330171	0.903732	0.633338	0.721268	1.36925	1.29649	1.14315	1.68659	0.00760971
Rarg	19411	1.99433	1.06759	1.28619	2.01324	2.62647	2.6919	1.68616	0.0481459
Galk2	69976	0.76918	1.03556	1.0269	1.51958	1.74538	1.5095	1.68611	0.00512271
Ccdc141	545428	1.04067	1.01204	1.25294	2.00655	1.94624	1.61998	1.68583	0.00601213
Gm7084	632287	0.976655	0.574961	0.64106	1.28596	1.29841	1.11177	1.68567	0.0222221
Psg21	72242	0.132486	0.16925	0.17661	0.297625	0.201125	0.306911	1.68427	0.040275
Rbm18	67889	1.2091	1.12186	1.21761	2.07693	2.04811	1.84487	1.68235	0.000521704
Aktip	14339	4.4983	4.7339	6.01603	7.71146	9.10638	8.81868	1.68128	0.00549404
Cacybp	12301	8.4106	9.28078	8.97064	14.2885	14.4041	16.1191	1.68073	0.000716881
Zfp428	232969	0.657284	0.676138	0.526712	1.01628	1.21016	0.899797	1.68065	0.0143972
Sh3kbp1	58194	0.414804	0.614148	0.762031	1.11584	0.995874	0.898307	1.68065	0.0266646
Gm3252	100041283	1.4213	2.24352	1.50041	3.00573	2.31741	3.35175	1.67948	0.043431
Angptl1	72713	0.185847	0.152623	0.223454	0.267528	0.336763	0.33929	1.6792	0.0150757
C80140	97244	0.0502428	0.0544616	0.0532455	0.0849809	0.0748511	0.104894	1.67601	0.0162214
E330011O21Rik	100126450	0.256746	0.470269	0.357896	0.529316	0.617913	0.670971	1.6759	0.0301346
Gm7035	630499	14.1842	16.4409	14.9737	20.9526	26.9246	28.5387	1.67583	0.0128482
Bgn	12111	6.10526	6.70811	5.94636	9.46169	12.0319	9.94131	1.67566	0.00680463
1110051M20Rik	228356	0.431959	0.569037	0.619392	0.726799	1.08005	0.907882	1.67536	0.0350099
Plod2	26432	0.796875	0.955316	1.24512	1.89289	1.39782	1.72246	1.67256	0.0264584
Eno3	13808	77.3337	72.2998	66.0857	101.87	123.161	135.77	1.67255	0.00970478
Slc47a1	67473	2.17857	2.86356	3.22872	4.70855	4.98054	4.14371	1.67248	0.00929583
Gm13812	241572	28.7916	28.3819	28.1109	47.1026	50.5407	44.8888	1.67126	0.00032394
Pitpnc1	71795	1.65443	2.47074	3.11032	4.34014	4.13262	3.61852	1.67111	0.0266902
Psmb10	19171	8.3572	13.2095	8.70992	13.3386	18.3957	18.8502	1.67074	0.0454268
Gm7120	633640	0.247607	0.20288	0.213859	0.38421	0.388424	0.337064	1.67036	0.00221388
Cobl	12808	0.209043	0.257812	0.300131	0.468917	0.470682	0.341274	1.67001	0.0271091
Tln2	70549	0.345648	0.279362	0.401867	0.499427	0.594176	0.620915	1.66964	0.0109476
0610040J01Rik	76261	0.306107	0.341475	0.42957	0.623385	0.578849	0.594384	1.66793	0.00353379
Fn3k	63828	1.865	2.13292	2.11937	3.66024	3.63828	2.89957	1.66709	0.00679918
Tmem141	51875	3.87664	4.46977	3.78977	6.02419	7.17237	7.03472	1.66702	0.00302636
Orc4l	26428	0.167607	0.198795	0.271629	0.352653	0.33372	0.376277	1.66551	0.013004
Rnf7	19823	8.03083	10.182	9.37359	12.551	16.0211	17.3691	1.66536	0.0174484
Tmem149	101883	0.293976	0.214331	0.370082	0.527255	0.44265	0.492535	1.66491	0.0191035
Ifi35	70110	2.34952	2.59198	2.54538	3.83231	4.60486	4.02455	1.66448	0.0024406
Oma1	67013	1.55787	1.64091	1.5738	2.86938	2.95426	2.11787	1.66398	0.01673
Fitm1	68680	9.99393	13.6482	8.86105	18.1012	18.6043	17.378	1.66394	0.0084271
Abhd8	64296	0.884775	0.944002	1.19517	1.47956	1.86402	1.6872	1.66365	0.0102356
Slc16a8	57274	0.071572	0.0742219	0.0650595	0.126552	0.125978	0.0982383	1.66356	0.00869757
Myo1f	17916	0.0818565	0.136975	0.141758	0.210407	0.197328	0.192052	1.66335	0.0162535
Il15ra	16169	0.658065	0.984288	0.973853	1.35262	1.46245	1.53488	1.66269	0.00840877
Ddo	70503	0.541316	0.763853	0.725443	1.1593	1.30887	0.908041	1.66265	0.0297295
Zfp606	67370	0.0933304	0.0872328	0.142087	0.182859	0.167085	0.186163	1.66158	0.0178108
Cdk5	12568	0.178488	0.163318	0.218535	0.31574	0.297846	0.317332	1.66134	0.00217739
Tmem182	381339	5.48992	6.85787	7.8933	11.4932	12.4744	9.64646	1.66068	0.0146343
Synj2	20975	0.194356	0.244649	0.150344	0.356584	0.31221	0.309917	1.66066	0.0141335
Ccdc127	67433	0.689561	0.855408	1.20312	1.52309	1.62203	1.41758	1.66031	0.0204043
Gm14085	381417	0.6831	0.565467	0.976478	1.11238	1.14329	1.43746	1.6598	0.0378598
Hddc3	68695	0.595367	0.706582	0.802962	1.1261	1.20295	1.16438	1.65965	0.00193391
H2-Q2	15013	19.2807	20.7774	16.0636	25.5037	34.0838	33.5523	1.6596	0.0164758
Rpp21	67676	4.82615	5.86117	5.24768	7.2744	8.59798	10.5665	1.65917	0.0250649
Il10ra	16154	0.296668	0.196329	0.217884	0.335612	0.393019	0.450744	1.65903	0.0257677
1810014B01Rik	66263	0.160265	0.185536	0.232513	0.294276	0.34982	0.315182	1.65875	0.00887609
Slc1a1	20510	0.127843	0.0886247	0.0826419	0.18844	0.142767	0.164705	1.65796	0.0275772
Gm826	329554	0.460859	0.55484	0.651515	0.773475	1.04385	0.945003	1.65686	0.0192392
Tmem191c	224019	0.03192	0.0460527	0.0504453	0.0607822	0.0806754	0.0712706	1.65653	0.0247563
Smtn	29856	8.20822	10.4128	10.912	16.7952	16.6156	15.4037	1.65288	0.00238024
Ddx17	67040	4.81741	4.32096	6.48332	8.21507	8.16184	9.44012	1.65264	0.0118726
Tspan2	70747	0.0489345	0.048813	0.0781127	0.103118	0.0869837	0.100254	1.65106	0.025158
Sae1	56459	0.867768	0.80415	0.911459	1.44098	1.39272	1.43113	1.65088	8.35931e-05
Sdr39u1	654795	4.69076	5.27903	4.58071	7.48348	8.56124	7.9749	1.65078	0.00114183
Entpd4	67464	5.17584	4.29607	4.895	6.11588	9.48933	8.11052	1.65072	0.0370666
Mmab	77697	0.381748	0.301392	0.405767	0.603278	0.626779	0.566625	1.64998	0.00282904
Mgll	23945	6.61587	9.72706	9.43061	12.4048	15.7919	14.3279	1.64993	0.0160761
5430405H02Rik	74487	0.03	0.03	0.03	0.054461	0.0399728	0.0538104	1.64716	0.0147418
Adrb1	11554	0.0985457	0.0828906	0.11867	0.171946	0.188808	0.133481	1.64686	0.0288278
Hnrnpa1	15382	2.84066	5.9137	5.6141	7.74028	8.59993	7.31498	1.64633	0.0418945
Gamt	14431	0.434729	0.434363	0.646285	0.727876	0.922103	0.843635	1.64554	0.0225783
Gm3813	100042383	0.573617	0.457393	0.428229	0.833432	0.731628	0.836026	1.64544	0.00502283
C1rb	667277	0.641117	0.559241	0.506511	0.747015	1.10698	0.954089	1.64517	0.0300825
Gpr4	319197	0.745271	0.908396	0.734315	1.22672	1.44959	1.25197	1.64502	0.00470188
H2-Q5	15016	35.5507	38.8989	32.9034	46.9625	62.2853	67.1997	1.64362	0.0220638
Gm10406	100038847	0.197307	0.282372	0.227419	0.426989	0.33782	0.397117	1.64323	0.0137626
Naalad2	72560	0.217255	0.283337	0.302895	0.432292	0.413877	0.47395	1.64299	0.00539369
Cacna1s	12292	1.45551	0.793896	0.873017	1.50626	1.70695	1.91183	1.64137	0.0492846
Zfp651	270210	0.571107	0.384751	0.348514	0.76686	0.666036	0.707804	1.64117	0.0204414
Nsmce1	67711	7.88093	14.5447	11.6455	17.8668	19.1173	18.9314	1.64114	0.0208372
Cars2	71941	1.04097	0.858407	0.742429	1.43486	1.6067	1.29158	1.64022	0.0110032
l7Rn6	67669	2.78366	3.10395	3.33164	4.67591	5.38136	5.05413	1.63911	0.00160924
Klf14	619665	0.03	0.044554	0.03	0.0672718	0.0536547	0.0504196	1.63883	0.0347652
Zkscan3	72739	1.84609	2.03754	2.06076	3.32973	3.38041	3.02583	1.63784	0.000625653
Rbbp6	19647	0.203408	0.157018	0.260647	0.290961	0.374541	0.351506	1.6375	0.0276356
BC046404	192976	0.752046	0.730262	0.88716	1.38729	1.18344	1.30901	1.63738	0.00283195
Rnu7	19866	3.1993	2.42671	2.07554	4.03305	4.32738	4.2394	1.63601	0.00892071
Rcbtb2	105670	1.18906	1.41622	1.69196	2.12679	2.55876	2.33536	1.63382	0.00904191
Lrrc48	74665	0.159305	0.113126	0.122775	0.208218	0.208333	0.229118	1.63375	0.00599532
Abhd14a	68644	0.863489	0.960323	0.891363	1.40529	1.50568	1.52424	1.63349	0.000255658
Psme1	19186	16.8637	21.1028	18.1671	26.9122	32.6682	32.0916	1.6331	0.00592476
Slc36a2	246049	0.941615	1.03295	1.18365	1.68777	1.94438	1.52342	1.63243	0.00924139
Lphn3	319387	0.03	0.03	0.0335589	0.0475787	0.0456517	0.0594262	1.63166	0.0115995
Alad	17025	2.80858	3.21557	2.96123	5.00781	4.98247	4.67044	1.63162	0.000298707
Gm10105	100042442	1.61354	2.4739	2.91277	3.8691	4.01409	3.5325	1.63076	0.0224964
Itih5	209378	0.149053	0.157073	0.176914	0.236874	0.260622	0.289945	1.63018	0.00434486
Uggt2	66435	0.222723	0.265875	0.258339	0.322049	0.499414	0.395195	1.62886	0.0421518
Cks1b	54124	0.644167	0.879529	0.701427	1.02069	1.24084	1.36243	1.62866	0.0190354
Slc35a5	74102	0.0958776	0.0906605	0.121664	0.172174	0.138828	0.190878	1.62841	0.0229824
Dnaic1	68922	0.449229	0.544091	0.54955	0.841042	0.866346	0.804894	1.62832	0.000959934
Gtf2h3	209357	0.983359	1.28729	1.56338	2.01484	2.36309	1.86496	1.62828	0.0228162
Tmem119	231633	0.608627	0.788441	0.507412	0.898845	0.944406	1.25737	1.62807	0.0459837
Aes	14797	17.3453	16.9902	16.9711	26.9025	31.1542	25.4034	1.62669	0.00342675
BC046404	192976	0.775499	0.755513	0.975802	1.43333	1.3256	1.31782	1.62627	0.00277094
Gm8825	667806	17.2348	12.4139	13.2026	24.4967	24.3432	20.7988	1.62512	0.00966418
Comtd1	69156	0.655625	0.692752	0.821498	1.03546	1.29374	1.19547	1.62436	0.00754433
Isca2	74316	6.49945	10.3689	8.29644	12.2392	14.4667	14.1635	1.62407	0.0165008
Mdp1	67881	2.57219	3.68334	3.95325	5.51066	6.36921	4.69743	1.62383	0.0296819
Ankrd24	70615	0.540857	1.02958	1.07947	1.30392	1.54219	1.45589	1.62346	0.0411343
Ldha	16828	24.3647	36.0088	29.1671	49.5565	51.937	43.8409	1.62311	0.0109371
Wdr33	74320	2.4793	2.85518	2.97585	4.64621	4.88943	3.94904	1.62264	0.00566771
LOC676689	676689	7.42206	7.5162	7.11347	8.7235	12.9283	14.0914	1.62088	0.0492391
Sptlc2	20773	0.0935119	0.0638849	0.0998459	0.126132	0.127626	0.16315	1.62068	0.0315619
Itpkb	320404	0.70458	0.727294	0.809141	0.986655	1.13844	1.50595	1.62027	0.0422291
2610528E23Rik	66497	8.14791	10.7716	6.96987	12.329	15.3688	14.2462	1.62013	0.020162
Cdk2	12566	0.288118	0.248721	0.28318	0.454862	0.438148	0.4346	1.619	0.000259762
Cenpf	108000	0.03	0.0330382	0.03	0.0419716	0.0485951	0.060034	1.6187	0.0233376
4933421I07Rik	71162	0.03	0.03	0.03	0.0492985	0.0552301	0.0411503	1.61865	0.010437
Tmod4	50874	3.55551	3.83176	3.36789	5.93129	5.64949	5.82569	1.61843	0.000148957
Tfpi	21788	4.03035	6.16003	4.98962	9.25405	7.68611	7.60452	1.61691	0.018758
H2-T10	15024	2.92828	3.11574	2.65232	3.80089	4.72768	5.53115	1.61674	0.0259765
Cdk4	12567	4.34857	6.09778	6.35539	8.02509	9.22681	9.9051	1.61632	0.0145301
Hopx	74318	27.8093	42.5268	48.0707	55.439	67.3868	68.507	1.61589	0.0297406
H2-Oa	15001	0.03	0.03	0.03	0.0417901	0.0419469	0.0616475	1.61538	0.0488063
Rcn1	19672	1.8931	2.03736	2.29016	3.00012	3.18409	3.86221	1.61502	0.0112596
Gm826	329554	0.498596	0.682982	0.7551	0.861122	1.16398	1.10236	1.61486	0.0296303
Smyd3	69726	0.324017	0.28911	0.31375	0.485067	0.556149	0.45501	1.61426	0.00392504
Hmgn2	15331	2.74219	5.05449	4.6936	6.35479	7.55021	6.25138	1.61377	0.0370275
Rangrf	57785	9.08061	8.30952	6.61252	9.79352	14.2659	14.6682	1.61347	0.0465258
Cops7a	26894	1.09984	1.35009	1.54777	1.96148	2.21783	2.2692	1.61306	0.00707779
Tmem33	67878	1.83467	1.8106	1.41006	2.67097	2.70424	2.7772	1.61264	0.0018628
Slc25a26	67582	2.88586	2.26455	2.06148	3.96243	3.72637	3.93485	1.61173	0.00474356
Irf5	27056	0.308567	0.3285	0.340885	0.450953	0.583948	0.540446	1.61086	0.00778671
Tnfsf10	22035	0.705973	0.589116	0.720013	1.16019	0.892021	1.19192	1.60991	0.0168502
Dnaja1	15502	8.30682	8.26862	7.28902	14.1907	11.6484	12.5595	1.60903	0.0040142
Gpn1	74254	0.962541	1.14495	1.09089	1.60668	1.92574	1.60905	1.60752	0.00552729
9630025I21Rik	408067	0.398447	0.333992	0.459659	0.650285	0.577403	0.68771	1.60674	0.0077198
Anks1	224650	0.357144	0.217646	0.30156	0.464646	0.510209	0.432942	1.60643	0.0187243
Ntsr2	18217	0.208663	0.147	0.142417	0.225221	0.293696	0.281135	1.60627	0.0283881
Rabl2a	68708	0.0702232	0.0785467	0.100691	0.11345	0.141196	0.14599	1.60601	0.0208438
Dbil5	13168	0.0548797	0.0686743	0.0723303	0.0935312	0.0984501	0.122402	1.60494	0.0190186
Gmpr2	105446	1.46235	1.57462	1.55177	2.27643	2.60235	2.48557	1.60488	0.000797523
Gimap4	107526	1.44104	1.36244	1.58898	2.20659	2.30422	2.53104	1.60317	0.00164075
Tpi1	21991	61.023	82.1953	69.972	108.33	117.615	115.826	1.60312	0.00317489
Rab3d	19340	0.347797	0.33338	0.346002	0.55289	0.642694	0.451035	1.60305	0.0205272
A430102J17Rik	109200	0.227716	0.252661	0.312031	0.422557	0.381704	0.465851	1.60285	0.0102828
LOC630896	630896	0.177622	0.134819	0.128601	0.238795	0.196459	0.271417	1.60228	0.0291881
Rhod	11854	0.228099	0.276115	0.228094	0.35066	0.420987	0.401204	1.60158	0.0050845
Cdk4	12567	3.91088	5.31896	5.88292	6.71671	8.27011	9.21597	1.60148	0.0316778
Sh3bgr	50795	11.8685	14.5078	9.8216	19.1973	17.1	21.6482	1.6008	0.0184876
Bcorl1	320376	0.0403842	0.0400832	0.03	0.067072	0.0597379	0.0498566	1.59926	0.0217453
Mrpl28	68611	12.5504	10.4906	9.12225	16.7649	17.2504	17.4167	1.59909	0.00319552
Hpgd	15446	0.959838	1.13953	1.10003	1.70538	1.40815	2.00048	1.59843	0.023671
9030612E09Rik	74530	0.03	0.03	0.03	0.042387	0.0525217	0.0486789	1.59542	0.00377313
A630039O03Rik	402762	0.105856	0.138855	0.181706	0.223324	0.216582	0.239567	1.59345	0.0214173
Cd34	12490	2.39148	3.56483	3.27918	4.18076	4.8359	5.69059	1.59247	0.0315163
Gm14509	100043940	0.214414	0.206902	0.278961	0.347442	0.429179	0.33849	1.59239	0.0198495
Lrrfip1	16978	0.11107	0.11139	0.189823	0.23793	0.196194	0.222359	1.59231	0.0479443
Ppapdc3	227721	1.932	1.78609	2.04233	3.29799	3.08011	2.79227	1.59196	0.00228459
Myo1f	17916	0.0759863	0.0988841	0.110569	0.125731	0.152729	0.175877	1.59171	0.0334829
Yes1	22612	0.360044	0.268012	0.384258	0.595685	0.418756	0.596421	1.59127	0.0442993
Fhit	14198	0.189141	0.239513	0.193032	0.339234	0.286799	0.363131	1.5911	0.0115616
Nfxl1	100978	0.0671492	0.0631836	0.0546555	0.0803989	0.11092	0.102763	1.58973	0.0209141
Cyp39a1	56050	0.628651	0.635521	0.707068	1.11938	0.974598	1.03971	1.5897	0.00136202
Eif2s3x	26905	4.341	4.10087	3.70342	6.20819	6.78242	6.3069	1.58889	0.000749708
Echdc3	67856	1.99866	2.48632	2.17864	3.35694	4.12774	3.09814	1.58815	0.0184991
Gm16391	100043886	0.706096	1.20093	1.12589	1.32386	1.75458	1.7381	1.58809	0.0464616
Zfp715	69930	0.178375	0.165965	0.233798	0.282382	0.326794	0.308865	1.58793	0.00987586
Irf1	16362	6.00334	5.06451	5.52187	6.73903	9.32936	10.2666	1.58743	0.0406421
D830030K20Rik	320333	0.398215	0.501275	0.567384	0.8026	0.807685	0.716863	1.58647	0.00749699
Snrpd3	67332	7.04381	9.20453	8.75112	11.1645	12.7833	15.7078	1.58626	0.0301152
Gm10635	100038575	0.102173	0.132492	0.12457	0.178571	0.216723	0.17431	1.5856	0.0125083
Ostc	66357	4.14226	5.80708	6.7636	7.79994	8.45647	10.2424	1.58552	0.0368063
Sae1	56459	1.83379	1.75895	1.99082	2.83498	3.00543	3.00832	1.58478	0.000258684
Rxrg	20183	6.45496	6.65013	7.46611	12.1068	11.2592	9.23298	1.58469	0.0115097
Wars	22375	1.23189	0.872527	0.857929	1.60071	1.62487	1.46867	1.58464	0.0118045
Pdlim7	67399	4.66171	4.49389	3.16834	7.16615	6.41669	5.93343	1.58361	0.015569
Slc30a6	210148	0.216484	0.209504	0.252944	0.436233	0.2956	0.342425	1.58228	0.0387639
Mdn1	100019	0.0791911	0.0567899	0.0977015	0.131735	0.121017	0.116905	1.58188	0.0229715
Mbp	17196	0.0574252	0.0615817	0.0651488	0.0976374	0.0855511	0.107954	1.58096	0.00648091
Wdyhv1	76773	1.13017	1.36898	1.44454	1.98423	2.36175	1.88775	1.58068	0.0115552
Cyb5rl	230582	0.518718	0.520713	0.584274	0.809343	0.973039	0.784004	1.58057	0.00756934
1190003J15Rik	76974	0.182239	0.17148	0.174089	0.291193	0.27691	0.265268	1.57893	0.000237738
LOC100048839	100048839	8.80003	5.6654	6.4855	9.45852	10.6076	13.0125	1.57886	0.0452437
Ethe1	66071	6.83062	6.0048	6.07082	9.3637	10.383	10.0934	1.57832	0.000825811
1190003J15Rik	76974	0.167321	0.136655	0.162633	0.262387	0.248793	0.225191	1.57814	0.00340224
LOC100045679	100045679	0.0638569	0.106509	0.111471	0.167278	0.141553	0.135788	1.57757	0.039032
2009-09-06	56526	0.364856	0.279253	0.314088	0.474518	0.496999	0.539665	1.57711	0.00418024
Eme2	193838	0.200905	0.300356	0.36635	0.428899	0.519609	0.419524	1.57678	0.0445465
Hopx	74318	17.9886	26.3376	31.85	37.7845	42.347	39.973	1.57667	0.0259562
D3Ertd751e	73852	0.780232	0.913276	1.08883	1.24105	1.54594	1.59928	1.57647	0.0201255
Ptpn6	15170	0.389839	0.502107	0.490469	0.720697	0.736365	0.721681	1.57604	0.00180305
Cpsf4	54188	0.569025	0.44854	0.408795	0.732838	0.737238	0.777872	1.576	0.00551021
Phkb	102093	0.469099	0.303636	0.390257	0.649159	0.671643	0.511892	1.57584	0.0319685
Mxra7	67622	0.258313	0.213283	0.272949	0.425661	0.363109	0.384268	1.57551	0.00512119
Tmem91	320208	0.0587283	0.0436606	0.0755021	0.0878708	0.0943299	0.0980176	1.57522	0.0242295
Ptk2	14083	0.539373	0.354577	0.583544	0.868146	0.704019	0.754072	1.57445	0.0294736
Shf	435684	0.209609	0.127314	0.186142	0.232721	0.283749	0.306209	1.57281	0.0380071
Gm2124	100039264	15.9864	16.0921	17.1531	26.5656	27.0025	23.861	1.57275	0.000863835
Tmem116	77462	0.409611	0.461033	0.534032	0.675225	0.810338	0.722903	1.57223	0.00747518
Nat8b	434057	0.583361	0.575029	0.641575	0.784249	0.967215	1.07807	1.57199	0.0176662
Coro6	216961	2.13854	1.93188	1.8942	3.15096	3.32466	2.89906	1.57172	0.00143105
Gm5506	433182	9.57585	13.876	12.6012	17.3257	20.284	19.0269	1.57092	0.0111135
Gm5617	434402	6.44303	7.84668	6.83023	9.61103	12.2385	11.2985	1.56951	0.0101756
Hlf	217082	0.38479	0.524142	0.547987	0.836969	0.680419	0.769043	1.56936	0.0153823
Tor1aip2	240832	1.15847	1.51673	1.47595	2.27316	2.34273	1.89847	1.56929	0.0115685
Bphl	68021	2.34223	2.03038	1.91294	3.35268	3.70875	2.80095	1.56906	0.015321
1810049H13Rik	66431	4.88543	7.06235	5.89461	8.90112	10.7438	8.32345	1.56752	0.0248202
N6amt2	68043	5.37304	8.76771	7.64888	9.9238	11.4529	12.779	1.56752	0.0334679
Akr1b10	67861	9.63558	7.80187	6.85566	12.7981	12.7678	12.5015	1.56701	0.00502602
Ankrd23	78321	6.11313	6.29629	5.45064	9.52571	8.33979	10.1173	1.56678	0.00440938
Gm7816	665839	3.6403	3.53764	3.27604	5.98449	4.81265	5.56976	1.56561	0.00540532
Sh2b3	16923	0.82424	0.463651	0.551187	0.924598	0.972709	0.981615	1.56542	0.0345009
Armc9	78795	0.0937402	0.110632	0.111894	0.134151	0.200707	0.159905	1.56439	0.0424056
Pcgf6	71041	0.260582	0.187027	0.206686	0.351518	0.347854	0.324177	1.56435	0.00644511
Fahd1	68636	3.68151	5.4504	4.55404	6.74828	7.66232	6.99712	1.56421	0.0112841
Gm6762	627480	0.609831	0.565477	0.553232	0.771501	0.91814	1.01406	1.56415	0.0110093
Tssc1	380752	0.617749	0.772839	0.745784	1.06141	1.17618	1.10347	1.5639	0.00234501
Ckm	12715	115.139	111.471	88.8082	172.921	165.189	154.867	1.56293	0.00372588
Sfrs12ip1	67288	2.33758	3.2222	3.40595	4.12633	4.68374	5.20182	1.56283	0.0205952
Tyk2	54721	0.190324	0.168636	0.196687	0.251617	0.323376	0.293296	1.56266	0.00975099
Pgam2	56012	50.9897	67.9825	54.7923	92.8699	91.9227	86.6996	1.56241	0.00405645
Serpinh1	12406	5.7709	7.38839	7.12012	11.4254	8.49044	11.7666	1.56229	0.0301112
Gm10169	100043796	18.8316	23.0227	17.0312	29.8452	30.6839	31.466	1.56227	0.00385262
Ccdc56	52469	11.1508	14.9622	12.9658	18.7186	21.2665	21.0658	1.56226	0.00592149
Trim12	76681	0.764261	0.683403	0.854198	1.11879	1.20382	1.2732	1.56213	0.00291917
Tmem8	60455	0.10414	0.117972	0.137202	0.184917	0.21572	0.160516	1.56173	0.0225207
Mif	17319	27.9375	34.7473	30.1562	46.8832	48.8086	49.2595	1.56128	0.00123832
Prmt7	214572	0.923784	0.805315	0.84463	1.46465	1.52001	1.03268	1.5609	0.0381478
Plxnb1	235611	0.217894	0.250279	0.25429	0.389485	0.33999	0.398204	1.56088	0.00326634
Actc1	11464	319.369	430.125	284.874	538.79	546.077	529.448	1.56068	0.0118217
Pkm2	18746	33.5759	36.9539	36.9222	54.1335	55.4144	58.0485	1.55973	0.000237749
Magix	54634	2.22329	1.73244	1.54585	3.26442	2.80761	2.50753	1.55947	0.0264256
Yif1a	68090	8.20822	9.07526	10.1995	14.0378	15.7792	13.0337	1.55917	0.0065772
Nkain1	67149	0.213011	0.230319	0.262425	0.389891	0.348577	0.361902	1.55914	0.00224668
Gm4948	240160	8.84275	9.63183	9.13343	15.5353	14.4522	13.0451	1.5587	0.00245187
Tcea3	21401	7.26279	6.58509	6.65814	10.6669	11.2481	10.0195	1.55732	0.000780415
Rbm4	19653	1.60643	1.89896	1.96298	2.86034	3.1029	2.55154	1.5571	0.00632367
Camk1	52163	3.32375	3.42478	3.26138	5.14005	5.30147	5.13795	1.5564	1.35205e-05
Dhrs4	28200	8.58399	7.20771	4.85733	11.1151	11.092	9.92781	1.55624	0.0296342
Bod1	69556	10.6843	10.4921	9.84691	14.4894	17.0424	16.7377	1.55591	0.00242745
Stk38	106504	0.269773	0.183363	0.23338	0.334055	0.338724	0.394976	1.55533	0.0161634
LOC226574	226574	37.1781	40.9443	39.5235	46.1375	65.948	70.8003	1.55454	0.0462651
Serpinf1	20317	4.99871	4.51168	4.72969	5.99341	7.72956	8.41006	1.55428	0.0229885
Ntsr2	18217	0.446251	0.340476	0.33372	0.537908	0.6077	0.59576	1.55417	0.00810695
Inpp1	16329	0.403063	0.261785	0.293888	0.575587	0.454569	0.459855	1.55414	0.0383024
Trub1	72133	0.28752	0.268684	0.312637	0.437459	0.500755	0.411899	1.55392	0.00542812
Gm8531	667237	11.534	12.4618	10.7812	17.732	18.986	17.3219	1.5539	0.000774336
Fhit	14198	0.242285	0.321079	0.246566	0.399794	0.445258	0.413246	1.55359	0.00665917
Gm16039	100036521	0.250463	0.326174	0.448227	0.541089	0.579467	0.471657	1.55359	0.0450474
Trim12	76681	1.67931	1.57061	1.82919	2.24807	2.68814	2.95342	1.55335	0.0128542
Gapdh	14433	202.563	146.184	138.367	253.969	266.538	236.084	1.55321	0.0152187
Hebp1	15199	2.01809	2.61035	2.95439	3.48786	4.41847	3.86918	1.55292	0.0220378
Kcnd2	16508	0.443385	0.543095	0.456053	0.89179	0.64954	0.698737	1.55287	0.0296321
Ptgr2	77219	6.15598	5.98012	5.93482	9.33951	9.91634	8.80187	1.55265	0.000535568
Akr1b3	11677	18.4434	18.8127	16.2953	28.8375	27.4674	26.7939	1.55176	0.000570371
Wdr18	216156	0.367681	0.308214	0.402376	0.580684	0.567119	0.525412	1.55176	0.00350019
5830469G19Rik	76093	0.173783	0.231739	0.269583	0.299633	0.369389	0.378369	1.55145	0.0293176
Dcakd	68087	0.953451	1.11803	1.27399	1.85132	1.55541	1.78291	1.55124	0.00879858
3110003A17Rik	73112	4.77985	8.41012	7.38494	11.3247	10.1613	10.4274	1.55109	0.0292191
Actr3b	242894	4.07067	4.03091	4.55205	6.20303	7.79244	5.62476	1.55056	0.0255982
Rnf141	67150	0.116032	0.0888286	0.114512	0.17078	0.169459	0.154929	1.55044	0.0045206
Zc3h8	57432	0.767161	0.627057	0.51004	1.07006	0.903831	0.975808	1.549	0.0170232
Cmpk2	22169	0.694452	0.422438	0.566976	1.01282	0.778381	0.815369	1.54797	0.0453812
Lonrf1	244421	0.451526	0.520494	0.606711	0.784488	0.749583	0.908279	1.54703	0.0119389
Adi1	104923	3.08133	3.69905	4.20348	5.83268	5.4998	5.65776	1.54684	0.0040883
Pxn	19303	0.308898	0.251231	0.227199	0.341383	0.449154	0.426286	1.54551	0.0246437
Ube2v1	66589	3.07756	3.32224	3.62402	5.98579	5.15732	4.33941	1.54457	0.0221033
Sike1	66641	0.453248	0.498028	0.546334	0.73852	0.732558	0.841885	1.54444	0.00364344
2410131K14Rik	76792	0.170577	0.13822	0.197366	0.255382	0.280774	0.245202	1.54369	0.0103203
Pqbp1	54633	1.78678	1.77677	1.51661	2.29934	2.8827	2.65882	1.54343	0.00862162
BC062258	408063	0.895422	0.610228	0.69687	1.33903	0.98076	1.07952	1.54337	0.0428208
Mapre2	212307	0.886675	0.958015	1.47044	1.89706	1.52035	1.6978	1.54299	0.0483864
Smtnl2	276829	0.568255	0.509028	0.668302	0.761185	0.883484	1.04685	1.5419	0.0293156
Vps13a	271564	0.413677	0.260911	0.326878	0.558242	0.49291	0.492481	1.54137	0.0215244
H2-Q6	110557	9.48928	10.373	8.9984	12.6448	15.4697	16.3524	1.54074	0.011896
Lad1	16763	0.855056	0.698	0.665458	1.07445	1.34828	0.994775	1.54044	0.030628
Rbm14	56275	0.248303	0.181147	0.216879	0.367692	0.351267	0.275645	1.53885	0.0277867
Herc5	67138	0.03	0.03	0.03	0.0535996	0.0407543	0.044091	1.53828	0.0137356
Fubp1	51886	0.67255	0.740183	0.726383	1.25177	1.1464	0.891799	1.538	0.0243373
2310014H01Rik	76448	0.30378	0.382704	0.259548	0.421646	0.514285	0.518643	1.53755	0.0240949
Ppp2r3d	19054	1.37674	1.81301	1.63601	2.21477	2.61238	2.59195	1.5374	0.00880043
Ccdc127	67433	0.982529	0.929203	1.0485	1.51413	1.55218	1.4821	1.5365	0.000188495
1700007L15Rik	108716	0.03	0.03	0.03	0.0441551	0.0373717	0.056753	1.53644	0.0471431
Pigy	66459	5.37229	5.34376	4.8013	7.60407	8.11436	8.11413	1.53587	0.000387392
9130015G15Rik	74567	0.03	0.03	0.0317803	0.052722	0.0411984	0.0469726	1.53511	0.00837127
Hira	15260	0.0679472	0.0557078	0.0772686	0.0996924	0.101855	0.106877	1.53503	0.00556936
Prmt2	15468	0.673611	0.728066	0.926421	0.991441	1.19835	1.38368	1.53493	0.0386728
Gm4226	100043094	0.0521347	0.0516957	0.0642379	0.0824848	0.0805726	0.0948971	1.53482	0.0079158
Chchd7	66433	0.207452	0.162852	0.198808	0.341847	0.272114	0.259252	1.53434	0.02518
Ppdpf	66496	6.7042	7.68361	7.82081	9.89984	11.8538	12.3218	1.53434	0.00852898
Gm14470	633354	8.60668	12.9761	10.5951	17.254	17.9149	14.1811	1.53366	0.028556
3110003A17Rik	73112	5.99346	9.31194	9.16076	11.8943	13.0954	12.5189	1.53308	0.01867
Dnajc11	230935	0.792857	0.859251	0.862573	1.37144	1.2973	1.18609	1.53293	0.00157472
Hspa8	15481	80.8358	55.2632	54.5939	106.031	95.3003	90.9574	1.53277	0.0253439
Gm8529	667233	55.8251	53.9245	44.1251	75.5103	79.6386	80.6397	1.53234	0.00229842
Fggy	75578	0.39746	0.46443	0.565947	0.660687	0.83334	0.69294	1.53166	0.0247509
Ksr1	16706	0.160095	0.0901492	0.141033	0.192759	0.207034	0.199498	1.53163	0.0311266
H2-Q10	15007	3.64302	3.77081	2.86582	4.29711	5.57987	5.86661	1.53153	0.0311833
Pfkl	18641	4.14659	4.07845	4.49701	6.60618	6.61115	6.26554	1.53142	0.000199995
Blmh	104184	1.05337	1.15108	1.24538	1.59761	1.83826	1.8464	1.53117	0.00345896
Med20	56771	1.47511	0.99027	1.39755	2.30078	1.76897	1.84183	1.53034	0.0382425
Ppa1	67895	4.59994	4.78461	3.62729	5.56951	7.24659	7.08507	1.52947	0.0234111
Trim35	66854	0.194577	0.259437	0.292999	0.380789	0.41816	0.343183	1.52893	0.0217946
Mmab	77697	0.447884	0.335039	0.309968	0.540709	0.576655	0.553093	1.52848	0.0116465
Pycrl	66194	0.544038	0.714055	0.863346	1.09218	1.13915	1.01046	1.52811	0.0199627
Sin3b	20467	0.355385	0.222407	0.297386	0.410106	0.461528	0.465552	1.5279	0.022166
Fam173a	214917	7.23913	10.5611	9.02072	11.5697	14.9723	14.4361	1.52784	0.0297518
Yy2	100073351	0.089345	0.104514	0.114305	0.177223	0.144534	0.149027	1.52771	0.0124377
Hhatl	74770	4.69569	5.1864	4.02857	7.01325	7.89347	6.34	1.52737	0.0120823
2009-03-02	224703	5.70961	5.88948	5.61303	8.27211	9.65639	8.35149	1.52683	0.00268786
Gm9387	668831	0.630755	0.522861	0.741296	0.775848	1.03724	1.07954	1.52652	0.0433573
Trappc9	76510	0.0691708	0.0542838	0.0693426	0.0934459	0.1098	0.0909144	1.52575	0.0120234
Cog6	67542	0.724678	0.616387	0.665686	1.07073	1.13876	0.850986	1.52509	0.0190186
Mid1ip1	68041	13.9421	11.5164	15.6403	22.8914	20.6964	19.0708	1.52458	0.0116138
2810021B07Rik	66308	0.704583	0.786772	0.906153	1.08287	1.30033	1.26939	1.5235	0.00954292
Gm7035	630499	28.6571	32.5465	30.7183	38.6546	47.5754	53.7247	1.52254	0.0239102
Tmem143	70209	6.06677	5.12681	4.61967	7.2369	8.25215	8.58412	1.52234	0.00934417
BC055308	407818	0.0696018	0.0777332	0.113099	0.134477	0.119056	0.142924	1.52229	0.0395982
Nek1	18004	0.312251	0.214533	0.34406	0.47984	0.419094	0.426587	1.52211	0.0250925
Slmap	83997	1.17977	1.76917	1.35958	2.4914	2.0223	2.04172	1.5215	0.032093
Pttg1	30939	0.336472	0.214314	0.230277	0.354797	0.380178	0.452319	1.5201	0.0483419
1700020I14Rik	66602	0.662423	0.436052	0.539439	0.848323	0.869538	0.771727	1.51997	0.016807
Glt25d2	269132	0.187831	0.132627	0.206013	0.264162	0.260061	0.275868	1.51973	0.0155845
Scnm1	69269	1.58582	2.23509	2.15118	2.71759	2.98649	3.37147	1.51966	0.0205777
Ttc27	74196	0.612732	0.665995	0.649008	0.920766	0.94105	1.06756	1.51959	0.00234027
Rnf5	54197	4.07086	4.17747	4.08853	6.01974	6.23019	6.47687	1.51795	9.75129e-05
Fdft1	14137	4.44876	5.62323	5.45493	8.061	9.05126	6.45523	1.51785	0.0332646
Stip1	20867	4.46288	4.35713	4.6856	7.36441	6.69648	6.43329	1.51746	0.00136512
Gapdh	14433	189.45	184.466	148.504	261.005	269.862	261.826	1.51735	0.00241285
Nudt1	17766	0.694051	0.924084	0.801167	0.96999	1.37094	1.32773	1.51641	0.0439286
Fam160b2	239170	0.169858	0.128016	0.130833	0.251541	0.21883	0.179609	1.51614	0.0409421
Kcnj11	16514	0.34499	0.545202	0.633628	0.725079	0.848749	0.735896	1.51575	0.0496084
9130401M01Rik	75758	0.791203	1.10577	0.931907	1.19426	1.55918	1.5343	1.5157	0.030827
Tardbp	230908	3.41239	4.74604	5.61828	7.39526	6.65877	6.82033	1.51519	0.025279
Jam2	67374	1.98604	1.59178	1.997	2.56108	2.76114	3.12277	1.51484	0.0106499
Prkra	23992	1.01172	1.09854	1.1866	1.52843	1.71866	1.74601	1.5145	0.0026562
Rffl	67338	0.0931277	0.0686755	0.0860777	0.127872	0.115375	0.131524	1.5119	0.00846584
Gm4535	100043585	4.90011	4.37361	3.42953	5.16161	7.02175	7.02262	1.51189	0.0453871
Cyp2b13	13089	0.03	0.03	0.03	0.0362319	0.0468615	0.0529605	1.51171	0.0348235
Aplf	72103	0.0700272	0.0528721	0.0703264	0.100948	0.11295	0.0781744	1.51156	0.0482129
Snap47	67826	2.37927	2.72015	2.93069	4.06244	4.33117	3.74231	1.5113	0.00426603
Glis2	83396	0.550365	0.437567	0.493217	0.719507	0.656282	0.862227	1.511	0.0217183
Car14	23831	23.9154	30.4765	28.4831	44.4755	46.6117	34.0915	1.51045	0.0311157
Gm15593	386426	171.391	173.205	130.593	223.36	248.018	246.368	1.51044	0.00725814
Cdh13	12554	9.60887	11.6448	12.3845	16.8573	17.3697	16.5787	1.51035	0.00266748
Apoa1bp	246703	10.7577	12.4194	12.0747	17.5718	17.4315	18.2101	1.50952	0.000434064
Tpd52l2	66314	1.00588	0.816169	0.896332	1.26479	1.35051	1.48775	1.50937	0.00560014
Gimap9	317758	0.311394	0.200208	0.293365	0.447379	0.366898	0.400684	1.50933	0.0303741
Fam149b	105428	0.678993	0.604682	0.584018	0.953998	1.03054	0.833953	1.50908	0.00777889
F630048H11Rik	100038492	0.111738	0.10456	0.134215	0.18424	0.157566	0.186892	1.50836	0.0101108
Gm7928	666098	3.82681	4.96879	4.98647	5.9706	6.73788	8.06804	1.5075	0.0321223
Whsc1	107823	0.0763095	0.0585798	0.0525671	0.0922791	0.0967528	0.0935407	1.5074	0.0119383
Inca1	103844	0.395825	0.357061	0.340712	0.630852	0.456099	0.560922	1.50684	0.0257377
Zfp444	72667	0.491719	0.397244	0.464394	0.679141	0.708777	0.651282	1.50677	0.00217976
Ldha	16828	41.0197	60.2531	49.2193	72.5824	81.3772	72.7601	1.50652	0.0155498
Nudt13	67725	1.87374	1.96382	2.02359	2.91969	3.24688	2.66274	1.50641	0.00477815
Mmab	77697	0.445036	0.282956	0.335321	0.48324	0.619607	0.498504	1.506	0.0494689
Mrps27	218506	2.38174	2.57692	3.02583	3.83402	4.55569	3.63076	1.50548	0.0166056
Wrb	71446	0.429071	0.447005	0.636874	0.703528	0.792581	0.781106	1.50515	0.0241832
Itpripl2	319622	2.6243	2.62498	2.81805	3.67262	3.76356	4.70386	1.50484	0.0155807
Nudt14	66174	1.20831	1.43962	1.37646	1.73356	2.22965	2.09224	1.50468	0.0142786
Rtn4ip1	170728	0.891644	0.936677	1.15334	1.61702	1.58579	1.28117	1.50385	0.0202539
Naa10	56292	4.50301	6.27683	5.16799	7.44438	8.77377	7.758	1.50341	0.0150061
LOC100045251	100045251	0.0868558	0.0605054	0.0731375	0.0985308	0.102687	0.130238	1.50321	0.0418477
LOC546078	546078	2.33392	2.78603	2.43682	3.68458	3.60815	4.06573	1.50309	0.00299479
Pts	19286	2.03404	2.58409	2.81146	3.39543	4.17454	3.59705	1.50305	0.019186
Akr1b3	11677	25.6771	26.893	24.461	38.4956	40.2946	36.8766	1.50156	0.000443117
Gapdh	14433	83.8748	80.7143	75.9829	112.814	120.388	128.011	1.50147	0.00124881
1600014C10Rik	72244	1.03023	0.826373	1.00719	1.41099	1.57897	1.30691	1.50041	0.0094757
Psd3	234353	0.319164	0.388231	0.465061	0.608926	0.614915	0.535101	1.50022	0.0166441
Ybx2	53422	0.601076	0.631341	0.631738	1.02134	0.844071	0.931184	1.5002	0.0039857
Rab3a	19339	2.73541	3.5113	4.25285	4.83426	6.04855	4.86383	1.49974	0.0420285
Tomm5	68512	32.375	35.8561	28.4658	46.0553	45.6155	53.335	1.49959	0.00807282
Gm16379	100040259	32.0552	39.9171	31.8302	49.5812	53.6683	52.4063	1.49954	0.00408285
Trappc3	27096	2.31684	2.24238	1.35322	2.83114	2.96949	3.06457	1.49941	0.0360079
Bscl2	14705	1.37269	1.95093	1.93004	2.33722	3.01419	2.51987	1.49825	0.0345264
Rgs6	50779	0.258646	0.238315	0.239741	0.355042	0.386518	0.361975	1.49794	0.000455131
Fam54b	76824	5.24769	5.02415	4.64183	7.39551	8.33532	6.60544	1.49771	0.00955323
1110032A13Rik	68731	3.49997	4.51978	3.69168	5.54933	6.71756	5.2732	1.49769	0.023085
Gm5513	433225	7.16732	7.53696	6.45919	8.89122	11.8821	10.9077	1.49696	0.0200053
Gnb5	14697	1.00229	0.878299	1.07282	1.32038	1.61994	1.48031	1.49679	0.00915039
Atg10	66795	2.48076	3.07942	2.14849	3.75797	4.00429	3.77593	1.49678	0.0108248
H2-Q7	15018	26.1356	27.6996	22.2221	30.2756	39.3858	44.1541	1.49644	0.0454578
Ube2v1	66589	3.45193	3.79941	4.16697	6.07033	5.82641	5.18594	1.49608	0.0048722
Fert2	14158	1.08159	1.13085	1.40658	1.76419	1.92789	1.72182	1.49596	0.00735727
Map2k2	26396	3.52595	3.10152	2.73437	4.13069	4.79913	5.06639	1.49503	0.0127585
Tomm5	68512	20.7955	25.3245	18.4582	28.3095	30.4023	37.7586	1.49385	0.0386067
Rell1	100532	2.16674	1.91339	1.55235	2.66355	2.47163	3.27063	1.49238	0.0367346
Msrb2	76467	9.31767	8.86895	6.7318	12.5674	13.2063	11.4	1.49182	0.0129688
Gm4461	100043474	0.0421748	0.0316322	0.03	0.0588889	0.0480911	0.0478434	1.49146	0.0321482
Chchd5	66170	2.47988	2.60299	2.67531	3.31269	4.06569	4.18969	1.49108	0.0105183
Trim34	94094	0.501486	0.384332	0.64024	0.682281	0.804442	0.788691	1.49104	0.0400247
Gm6594	625514	13.5081	19.2877	24.0414	25.9345	30.7508	28.0604	1.49103	0.0499381
Gm13668	667729	176.094	166.517	133.166	224.934	254.243	230.159	1.4909	0.00794852
Nme4	56520	0.342017	0.529939	0.563729	0.629249	0.795047	0.715587	1.4905	0.0490133
Matn2	17181	0.599697	0.581348	0.786609	0.958911	0.914438	1.05875	1.49015	0.0147428
Acy3	71670	3.26981	3.84324	4.00843	5.13717	6.27813	5.1527	1.48973	0.0144378
Dnajc28	246738	0.359494	0.337616	0.423167	0.624224	0.571841	0.472665	1.48957	0.0235326
Mri1	67873	1.86656	2.49706	2.5999	3.08324	3.96597	3.32297	1.4895	0.0312884
Enpp5	83965	0.541076	0.701738	0.655176	0.828409	0.928914	1.06973	1.4895	0.02166
Gm8055	666342	203.808	198.743	159.614	274.076	280.041	283.195	1.48944	0.00297261
Mrpl41	107733	11.5979	16.1325	12.372	18.2448	19.5361	21.9445	1.48932	0.0209582
Gstp2	14869	23.3711	21.158	18.7781	27.5241	30.9396	35.818	1.48927	0.0198188
0610012G03Rik	106264	0.309453	0.252843	0.342519	0.518886	0.446962	0.381296	1.48886	0.0362704
Btk	12229	0.093531	0.12464	0.133594	0.1593	0.177004	0.187118	1.48799	0.0173028
Gm12538	619973	0.430123	0.392263	0.373174	0.553592	0.685889	0.539365	1.48788	0.0172052
Cadm4	260299	0.172876	0.230098	0.223922	0.283184	0.309354	0.339699	1.48707	0.0140189
Tsfm	66399	3.01105	3.26258	2.70187	4.25488	4.75674	4.32788	1.48621	0.00296694
Cbr4	234309	3.84104	4.2722	3.41195	6.02819	5.64436	5.45534	1.48613	0.00339543
Reep5	13476	3.49136	4.56213	4.88104	7.05565	5.5219	6.63129	1.48508	0.0281066
Myadm	50918	2.26736	2.70711	2.78742	3.91581	4.10021	3.51036	1.485	0.00616977
Nprl2	56032	1.62806	1.32889	1.51883	2.23859	2.12068	2.28661	1.48485	0.00196323
Ppif	105675	5.02393	7.27159	6.54328	9.46407	9.6479	8.85483	1.48453	0.0124369
Fam173b	68073	1.47635	1.83435	1.76999	2.32621	2.62456	2.59127	1.48445	0.00481859
Nqo2	18105	0.583543	0.790318	0.637074	1.04359	1.0399	0.900732	1.484	0.0140186
Wdr45l	66840	0.672917	0.911777	0.884034	1.2638	1.40632	0.992694	1.48369	0.0494937
2310011J03Rik	66374	1.53422	1.81375	1.70731	2.26229	2.78499	2.4525	1.48355	0.00925915
Gm2694	100040294	0.0928594	0.112253	0.0806203	0.124631	0.146349	0.152902	1.48349	0.021469
Nfe2l1	18023	4.10589	3.1177	3.32579	5.39167	5.22736	5.0308	1.48348	0.0059232
Psmd14	59029	2.84858	3.67627	2.89163	4.75231	4.95136	4.25946	1.48284	0.0110253
Cpt1c	78070	0.0947216	0.0723804	0.0751549	0.11014	0.128296	0.120634	1.48219	0.0113875
Usp14	59025	0.193244	0.19167	0.192066	0.284743	0.254442	0.315865	1.48194	0.00640355
Acot8	170789	1.2444	0.943036	1.11096	1.46679	1.7303	1.68936	1.48146	0.0114575
Mrpl35	66223	0.466305	0.558019	0.66296	0.841507	0.892992	0.765028	1.48139	0.0162944
Cyb5r1	72017	0.625081	0.629837	0.698402	0.88911	1.00928	0.993783	1.48064	0.0021647
Slbp	20492	0.893808	0.73379	0.8989	1.28925	1.20691	1.24456	1.4806	0.00239472
Sox12	20667	0.03	0.0346232	0.0368272	0.0480501	0.0507204	0.051368	1.47992	0.00196992
Zmat5	67178	2.79394	3.77546	3.59439	4.43116	5.25765	5.35118	1.47976	0.0179927
Capn1	12333	0.565003	0.668338	0.677968	0.883207	0.96717	0.977716	1.47966	0.00286823
Tpi1	21991	95.9106	123.967	111.746	155.204	175.895	159.553	1.47955	0.00670828
Adamtsl5	66548	1.49449	1.58624	1.38317	1.938	2.06666	2.59849	1.47923	0.0275971
LOC638803	638803	6.29336	8.07706	7.12494	9.85028	10.989	10.9519	1.47898	0.00572147
Gm8927	668018	151.905	135.942	106.731	190.536	205.884	186.784	1.47804	0.0121722
Zmat1	215693	0.03	0.03	0.0446067	0.0537888	0.0556294	0.0451818	1.47792	0.0461699
Parp10	671535	0.8449	1.01647	0.922035	1.28977	1.45095	1.37285	1.47789	0.00286042
Vbp1	22327	5.70124	7.07997	7.20412	9.88344	10.4192	9.22773	1.4776	0.00579541
1500026H17Rik	69002	0.825632	0.745533	0.732038	0.965037	1.31374	1.12414	1.47747	0.0250492
Tax1bp3	76281	3.2226	3.4906	3.1667	4.56248	4.85281	5.17949	1.47722	0.0015372
3830406C13Rik	218734	0.62836	0.578533	0.684558	0.928513	0.93872	0.92675	1.47716	0.000619502
Fam60a	56306	0.0728905	0.0637827	0.078432	0.0998874	0.107464	0.11035	1.47696	0.00294606
Hemk1	69536	0.590804	0.77377	0.900169	1.1341	1.24942	0.957029	1.47502	0.0441345
Dpy30	66310	3.57326	4.75142	4.14862	5.32097	6.03605	7.02018	1.47332	0.0302818
Rad51l1	19363	0.05612	0.0608182	0.0382005	0.0792585	0.0708388	0.0784487	1.47317	0.0296787
Gm8483	667152	12.2811	18.3719	17.2933	22.4987	25.2518	22.8802	1.47312	0.0215378
Schip1	30953	9.81588	9.01343	9.34449	14.7044	13.0215	13.7771	1.47311	0.0011851
H2-T23	15040	25.0414	28.609	24.7197	30.7167	39.7471	44.969	1.47292	0.0467259
Gm8280	666767	0.3059	0.254331	0.263039	0.429967	0.404125	0.377887	1.47215	0.00409391
Gm16500	100039350	1.16989	1.07826	1.1819	1.44324	1.72429	1.88114	1.47189	0.015087
Abhd14b	76491	0.967852	0.965613	1.11258	1.30792	1.47802	1.6964	1.47153	0.017417
Abcc9	20928	8.15628	8.36023	9.205	12.492	11.8774	13.4713	1.47117	0.00201533
Slc22a5	20520	0.596433	0.775355	0.832238	1.11327	1.14084	0.987369	1.47071	0.0154324
LOC634780	634780	0.67716	0.947788	0.634999	1.15581	1.08711	1.08051	1.47058	0.0246057
Gm10078	100042811	13.3571	19.7424	16.3633	21.7614	26.2182	24.7499	1.47039	0.0266051
Adh5	11532	0.192091	0.234312	0.248174	0.367146	0.324181	0.30043	1.47019	0.0148773
Sez6l2	233878	0.163456	0.201598	0.150885	0.244292	0.227486	0.286715	1.47012	0.0255949
Stap2	106766	1.73842	1.38039	1.46532	2.09019	2.23023	2.41595	1.4695	0.0074771
Gm12791	665362	0.809905	0.974304	1.02038	1.44424	1.35219	1.32436	1.4693	0.00394383
Fhod1	234686	1.10965	0.790507	0.717586	1.30377	1.18351	1.35876	1.46922	0.0353715
Pomt2	217734	0.504618	0.421864	0.602379	0.724123	0.736537	0.785297	1.46904	0.0125077
AU022252	230696	0.307933	0.191976	0.252013	0.379031	0.377979	0.347473	1.46888	0.0284754
Cyb5r3	109754	4.28392	4.13717	3.51069	5.75937	6.46931	5.29003	1.46824	0.0110902
Gm7776	665766	1.3201	1.56712	1.16445	1.96931	2.12267	1.85105	1.46681	0.0111073
Cryzl1	66609	2.039	2.66837	2.95206	3.36749	3.82458	4.04055	1.46651	0.0236603
Trim30	20128	0.453767	0.360609	0.530995	0.732135	0.578384	0.662371	1.46643	0.0344238
Herc5	67138	0.105942	0.144284	0.131916	0.196761	0.185931	0.177662	1.46635	0.00915546
BC003266	80284	4.48682	5.33344	4.81145	6.43453	7.23613	7.78357	1.46628	0.00796926
2410022L05Rik	66423	1.32043	1.46579	1.3481	1.7483	2.08709	2.22459	1.46577	0.0123878
Tmem171	380863	0.994526	1.48069	1.55925	1.75195	2.12873	2.03158	1.46544	0.0405046
Asap3	230837	0.295912	0.195431	0.298178	0.393611	0.336861	0.425896	1.46464	0.045815
Timm50	66525	3.53501	3.71195	2.87169	4.49931	5.39769	4.92114	1.46444	0.0126512
Arl6ip1	54208	1.13478	1.03067	1.10725	1.39855	1.73803	1.65603	1.46442	0.0090441
H2-K1	14972	23.1701	28.1317	25.4019	32.3534	38.9221	41.0401	1.46428	0.0164048
Gm14719	100041697	8.81383	10.3673	10.806	13.0592	15.8672	14.9767	1.46406	0.0106308
Gm5431	432555	0.0750162	0.0977082	0.100109	0.136445	0.123067	0.139931	1.46405	0.0113295
Gm6298	622213	169.075	158.668	121.237	218.407	229.147	209.538	1.46352	0.0112561
Ssx2ip	99167	0.0851853	0.0662477	0.0950737	0.13376	0.12781	0.0991866	1.46348	0.0489688
Fhl2	14200	77.3681	103.334	84.6707	134.22	116.981	137.142	1.46338	0.0147
Nup35	69482	0.826527	0.562768	0.89601	1.09326	1.12188	1.12805	1.46291	0.0259384
Mpnd	68047	3.73496	3.24044	3.24663	4.36503	5.47146	5.10932	1.46212	0.0124561
2810006K23Rik	72650	0.950025	1.15975	1.06956	1.41384	1.54096	1.69268	1.46178	0.00834513
Pkig	18769	8.75105	10.0465	9.53287	13.0026	14.7713	13.6233	1.46122	0.00244305
Thy1	21838	1.90984	2.47434	2.01756	2.83239	2.87993	3.64193	1.4612	0.035112
Gm6637	625931	3.77042	4.50411	4.42509	5.43572	6.6477	6.46709	1.46071	0.0117018
Zpbp	53604	0.124949	0.119366	0.149848	0.176658	0.223743	0.175259	1.46046	0.0307021
Spata2L	78779	0.27162	0.242098	0.219684	0.327638	0.410111	0.333256	1.46032	0.0211611
Casp6	12368	2.4022	2.79411	3.22722	3.62367	4.54303	4.13203	1.46004	0.0223961
Tmx4	52837	3.14092	3.28682	3.92525	5.12545	4.81434	5.17369	1.45982	0.00395788
Med29	67224	2.8392	3.30494	3.06225	3.73594	4.69399	5.00855	1.45969	0.0254067
Smurf2	66313	0.296264	0.177019	0.243329	0.36878	0.353234	0.323559	1.45905	0.0412667
Samd1	666704	2.10241	2.46166	2.15075	3.16733	3.08682	3.54158	1.45882	0.00463962
Zbtb42	382639	0.111326	0.0833849	0.0873243	0.126745	0.131181	0.153494	1.45875	0.0230691
Akr1e1	56043	1.23149	1.60284	1.74052	2.12611	2.50666	2.04021	1.45862	0.0286387
3110062M04Rik	78412	0.448769	0.362668	0.559851	0.661157	0.659641	0.679026	1.45835	0.0217859
Gm5652	435292	67.2792	63.4602	50.9916	85.401	94.5694	85.0416	1.45826	0.00885655
LOC100046321	100046321	0.431893	0.515295	0.473467	0.630743	0.761895	0.678023	1.45754	0.00874291
Ube2n	93765	2.80332	3.64227	3.2226	4.87574	4.55102	4.66172	1.4572	0.00479908
Gm2775	100040445	0.03	0.03	0.03	0.0392744	0.0501483	0.0416995	1.45691	0.0141541
Wdr82	77305	2.15104	2.09921	2.36572	3.11302	3.20161	3.32292	1.45671	0.000585016
Tagln2	21346	10.0366	10.0577	8.63907	11.3488	14.4004	16.1007	1.45649	0.0407458
Nipsnap3b	66536	0.671978	0.703949	0.920703	0.955068	1.17769	1.2117	1.45625	0.0357325
Sacm1l	83493	1.94337	1.70795	2.3739	3.20659	2.76048	2.80702	1.45623	0.0190597
Rsl24d1	225215	1.73954	1.97134	1.87908	2.83994	2.93101	2.36768	1.45594	0.0104992
Robld3	83409	8.54436	11.4452	9.60106	12.5252	15.4503	15.0932	1.45548	0.0229885
Mamdc2	71738	0.190359	0.181105	0.203254	0.295641	0.27178	0.268931	1.45524	0.00120199
Josd2	66124	5.70042	5.21679	4.5566	6.72363	7.34579	8.43666	1.45446	0.0174836
Scnm1	69269	3.66623	5.51636	5.21596	6.48464	7.02468	7.43152	1.45437	0.0264926
Hspbp1	66245	4.25045	5.40443	5.03726	6.70391	7.97947	6.68421	1.45436	0.0152723
1110002E22Rik	100039528	2.25208	2.65467	3.63442	4.21433	4.14447	4.06011	1.45401	0.0351667
Hax1	23897	4.50936	4.14477	4.41676	5.698	6.44011	6.8654	1.45388	0.00525765
Lims1	110829	6.25978	6.83738	7.73163	11.2067	8.92676	10.1449	1.45368	0.0160035
1810020D17Rik	66273	8.73284	10.4853	8.34374	12.1437	13.891	14.0314	1.45368	0.00964161
Rgs4	19736	1.11522	0.889213	1.34278	1.70054	1.45437	1.7107	1.45363	0.0312044
Sdr39u1	654795	3.74479	4.58493	3.33502	5.88788	5.93022	5.12986	1.45292	0.0174053
Nap1l4	17955	8.45098	7.955	8.92841	11.6677	13.4328	11.6993	1.45256	0.00411894
LOC636901	636901	53.7013	65.5082	58.0166	70.7	91.3355	95.3055	1.45205	0.0332039
Gm9081	668275	184.222	174.467	135.533	241.217	235.178	241.009	1.45158	0.00771571
Elovl1	54325	3.99791	3.28886	3.54406	4.5484	5.65403	5.51706	1.45137	0.015825
Caprin1	53872	0.079726	0.0719458	0.0935983	0.123263	0.12876	0.103951	1.45136	0.0198991
LOC100044526	100044526	8.81382	13.2706	10.3086	14.5848	17.4116	15.0168	1.45134	0.0365858
Snapin	20615	4.78946	6.67549	6.82439	8.17146	9.9819	8.3903	1.45132	0.0339281
2810428I15Rik	66462	6.65664	7.86251	6.89228	9.0841	10.3596	11.622	1.4509	0.0172043
Abcf1	224742	1.54368	1.07829	1.20425	1.74139	1.93535	1.87335	1.45054	0.0187211
Gm6372	622952	73.4459	89.9637	90.0301	124.387	109.753	133.33	1.44993	0.0125145
4632428N05Rik	74048	0.766787	0.804784	0.668994	0.913342	1.24287	1.09207	1.44976	0.031485
4831440E17Rik	320965	0.709664	0.73371	0.744949	0.994654	1.04764	1.12996	1.44963	0.00128961
Ispd	75847	0.108556	0.110175	0.113985	0.179137	0.171501	0.131661	1.44958	0.0281082
Gapdh	14433	281.522	262.973	191.735	340.041	394.129	332.962	1.44946	0.0301364
Tppp	72948	0.387983	0.316258	0.465761	0.612453	0.576517	0.50631	1.44896	0.0302612
Prlr	19116	0.128652	0.134195	0.115275	0.194067	0.186768	0.1669	1.44856	0.00459935
Nme6	54369	3.50844	3.46893	3.16917	4.36567	4.93209	5.39864	1.44841	0.00877565
Rtn2	20167	10.9475	12.3926	12.5635	17.776	17.9891	16.2357	1.44834	0.00205627
4833439F03Rik	78786	0.135377	0.145955	0.117699	0.158447	0.216358	0.201852	1.44515	0.0370886
Tnfaip8l2	69769	0.179884	0.200278	0.247558	0.260584	0.316182	0.330147	1.44477	0.0333358
Ipo7	233726	0.961896	0.792758	0.773819	1.37143	1.29085	0.990411	1.44462	0.0453388
Il10rb	16155	6.02642	6.78945	7.16942	9.38067	10.1365	9.35309	1.44457	0.00218773
Surf2	20931	2.45928	2.83167	2.59068	3.39855	4.09637	3.88504	1.44386	0.00753434
Mgst3	66447	110.702	134.641	121.103	177.399	158.213	193.434	1.44372	0.0116842
Dusp7	235584	4.25147	3.4131	3.64024	5.54092	4.49974	6.27726	1.44345	0.0434461
Snx5	69178	2.25542	2.41973	2.98804	3.80774	4.17445	3.07571	1.44299	0.044674
Cttn	13043	0.73715	0.787879	0.909447	1.16333	1.29385	1.05568	1.44296	0.0137905
Atxn7l1	380753	1.66553	1.84003	2.09671	3.05365	2.60903	2.42075	1.44288	0.0214606
1810020D17Rik	66273	8.54408	9.63051	8.75918	12.0348	13.6868	13.1401	1.44286	0.0025039
Rsl24d1	225215	4.24887	4.73959	5.11195	7.51576	7.06123	5.76535	1.44268	0.0231325
Gm2383	100039709	226.714	233.302	207.141	305.712	307.57	349.018	1.44239	0.00369079
5730405A17Rik	70482	0.0371441	0.0442828	0.03	0.0472631	0.0609647	0.0524703	1.44218	0.0458643
Trappc1	245828	2.46232	3.60696	3.165	3.97221	4.6525	4.69111	1.442	0.0287417
Nat9	66176	0.602761	0.755008	0.683596	0.92165	1.09614	0.925293	1.44173	0.0142707
Rom1	19881	1.45658	1.33728	1.11474	1.84663	2.18942	1.5971	1.44122	0.0444759
Lgals4	16855	7.56619	7.95221	8.86871	11.3461	13.5761	10.2171	1.4409	0.0277374
Rpsa	16785	61.4625	77.4504	67.2504	80.7606	108.43	107.733	1.44024	0.0417623
Nme6	54369	2.56155	2.40112	2.33559	3.04769	3.70002	3.76221	1.44006	0.0108643
Cbx5	12419	0.290604	0.39307	0.407663	0.466678	0.534482	0.57	1.43967	0.0284814
Jam2	67374	4.29996	6.61474	6.47215	7.41866	8.85675	8.74771	1.4392	0.0444692
Ept1	28042	0.390673	0.297868	0.344461	0.540006	0.451754	0.494854	1.43912	0.0149782
Slc25a20	57279	20.7938	19.9945	15.7966	30.2315	28.817	22.3675	1.43883	0.0450121
Aip	11632	6.09914	5.31788	5.52117	7.81201	8.28764	8.26671	1.43855	0.000912599
Psd3	234353	0.467079	0.617475	0.749672	0.928802	0.901332	0.807773	1.43816	0.0401788
Tef	21685	7.68128	9.04206	9.86115	13.0845	12.0903	13.0541	1.43802	0.00557457
Ccdc90b	66365	2.43481	3.32454	3.20647	3.97072	4.59247	4.3291	1.43794	0.0169468
LOC674496	674496	51.0162	57.8676	51.8926	75.6931	79.6428	75.6946	1.43697	0.000749691
Mrps25	64658	8.16582	8.96648	7.85401	10.5152	12.1082	13.2745	1.4367	0.0136764
Fam160b2	239170	0.930864	0.6645	0.700698	1.19357	0.930491	1.17412	1.43645	0.0482669
Tsen34	66078	8.98457	11.8768	11.9904	14.788	16.6337	15.7423	1.43566	0.0130041
Ctsf	56464	4.17331	3.82	3.80205	5.45998	6.48896	4.97745	1.435	0.0207745
Timm22	56322	2.88206	3.4805	3.36198	4.30378	4.9151	4.73557	1.43497	0.00542559
Guk1	14923	11.5703	14.2084	14.6402	18.8771	20.2374	18.8829	1.43491	0.00524635
Smc4	70099	0.801308	0.946144	0.944119	1.30457	1.12919	1.42807	1.43479	0.0170025
Inca1	103844	0.446261	0.385118	0.394167	0.676604	0.561595	0.520094	1.4347	0.024591
LOC100048880	100048880	0.100039	0.111333	0.157089	0.182659	0.182875	0.163078	1.43465	0.0457164
Klhdc3	71765	7.0164	7.16191	6.47354	9.17211	10.5868	9.86278	1.43433	0.00286693
Ankmy2	217473	0.717642	1.03158	1.0488	1.30193	1.46121	1.24978	1.4342	0.0316917
Kdm5c	20591	0.117863	0.0908357	0.0940274	0.158703	0.127174	0.148273	1.43414	0.0254126
Ak1	11636	35.0088	45.4389	43.0843	60.8781	62.7382	53.4919	1.4337	0.0135265
Usf1	22278	0.579644	0.685371	0.685369	0.809897	1.073	0.913096	1.43356	0.0286969
Gnb4	14696	0.230702	0.235652	0.304583	0.336816	0.418713	0.3496	1.43349	0.0330583
Ttll12	223723	0.203648	0.239633	0.315757	0.331267	0.360869	0.395916	1.43346	0.0446145
Kbtbd12	74589	1.44901	1.18678	1.01808	1.77245	1.84185	1.62325	1.43342	0.0200465
Mrps36	66128	16.8402	23.5738	16.5329	24.8306	28.6644	28.1257	1.43328	0.0337266
Chtf8	214987	4.26653	3.51815	5.16719	5.95853	5.87694	6.72803	1.43327	0.0270075
Pik3c2b	240752	0.119226	0.071998	0.114185	0.151697	0.145776	0.140129	1.43284	0.0453664
Laptm4b	114128	4.18519	5.18708	5.67704	7.24751	7.36495	6.94642	1.43255	0.00894138
Ppil3	70225	1.80337	2.094	2.0253	2.51251	2.95419	3.01701	1.43241	0.00925788
Crebl2	232430	0.526505	0.333698	0.446956	0.635728	0.643055	0.593472	1.43231	0.0315049
Gm10290	100039258	268.658	275.031	232.637	352.793	359.879	399.027	1.432	0.00459856
Pfdn2	18637	6.60326	8.81438	7.34863	9.91467	11.0226	11.6564	1.43167	0.0165396
Gm6560	625174	48.9133	51.5656	46.3567	72.8755	75.4472	61.8489	1.43134	0.0088931
Lmf1	76483	2.80023	3.01987	2.73387	4.37155	4.00579	3.86276	1.43093	0.00214017
Tmem204	407831	7.28827	5.93401	5.59646	7.92721	8.56091	10.434	1.4306	0.041616
Cox19	68033	8.109	9.68584	8.48594	11.7642	11.5751	14.2456	1.43013	0.0185671
Kcnj12	16515	0.613916	0.599344	0.84601	1.07047	0.935676	0.938574	1.42998	0.0320408
Gm16470	676923	211.816	221.264	178.404	276.457	290.013	307.771	1.42971	0.00523906
Aldh3a2	11671	0.557467	0.491944	0.589587	0.699172	0.88881	0.755006	1.42953	0.0205746
Endog	13804	9.48328	10.265	6.79508	11.57	13.7416	12.6252	1.42924	0.0360971
Ptdss1	19210	3.02668	2.80424	3.2645	4.29027	4.576	4.12931	1.42881	0.00221926
Tufm	233870	19.3126	16.6776	16.4059	25.1402	28.5309	21.1854	1.42867	0.031901
Snx12	55988	1.02456	1.15976	1.01232	1.41369	1.75495	1.39803	1.42859	0.022081
Ddit3	13198	2.9118	2.53147	2.06371	3.10653	3.56989	4.04698	1.42846	0.0427972
Grb2	14784	0.878678	1.19414	1.25917	1.70766	1.62925	1.42213	1.42829	0.030565
Tpd52l2	66314	1.10507	0.88022	0.905773	1.2536	1.26147	1.6122	1.42759	0.0404636
Pnck	93843	0.399146	0.478038	0.48973	0.730601	0.656089	0.564209	1.42723	0.0252986
1190007I07Rik	544717	5.97591	7.41124	6.50237	8.71801	9.89229	9.76988	1.42689	0.00725386
Kcnj5	16521	2.93644	2.67805	3.52074	4.27209	4.41289	4.34615	1.42647	0.00678141
Utf1	22286	0.557085	0.755753	0.486102	0.79243	0.898835	0.874505	1.42627	0.0423015
Cryab	12955	150.696	174.519	139.76	223.694	220.799	218.684	1.42627	0.00310555
Fbxl8	50788	0.290106	0.230452	0.301277	0.328486	0.429607	0.413813	1.42596	0.0382602
Spint2	20733	0.594412	0.828869	0.697014	0.923605	1.04498	1.05472	1.42589	0.0196482
Gm5507	433184	293.878	277.572	227.446	349.306	389.227	400.575	1.42585	0.0110042
Gm8387	666966	3.90085	4.65944	4.11474	5.19263	6.28497	6.59436	1.42579	0.0201759
Gm8709	667572	236.392	224.98	188.087	291.58	314.255	319.835	1.42529	0.00556711
Nkiras1	69721	2.43133	3.45336	3.31619	4.16596	4.55113	4.39412	1.425	0.0184226
Tgfb1	21803	2.12997	2.20719	2.61968	3.40152	3.55174	2.95255	1.4239	0.0140046
Gm5452	432789	25.4825	38.5255	33.9657	44.9276	49.7518	44.7931	1.42357	0.0291269
Asb2	65256	15.116	12.1291	10.6718	18.4706	18.5164	16.9885	1.42352	0.0187655
Slc30a9	109108	1.73367	1.58907	1.63207	2.6711	2.50898	1.87289	1.42346	0.0474551
Gfra4	14588	0.373141	0.252457	0.287788	0.476305	0.39635	0.426979	1.42287	0.0394251
Gm7251	638833	186.586	183.632	147.58	228.492	248.706	259.551	1.42285	0.00923561
Fancl	67030	0.743824	1.11348	0.898003	1.17001	1.31317	1.43706	1.4228	0.0423889
Rab8a	17274	1.63373	1.91512	1.91034	2.26592	2.91332	2.58556	1.42233	0.0211768
Wdsub1	72137	0.485766	0.651797	0.625631	0.808399	0.885628	0.813377	1.42208	0.0123291
Gm8995	668139	0.165535	0.147127	0.206714	0.251025	0.238839	0.248669	1.42196	0.0153858
Fmc1	66117	43.7066	60.9638	49.2423	62.8093	75.1218	80.9203	1.42192	0.0426002
Dusp12	80915	0.662997	0.505024	0.644425	0.803943	0.907641	0.865472	1.42187	0.0119089
LOC637477	637477	0.140409	0.203657	0.168599	0.229392	0.244789	0.254616	1.42159	0.0216776
A830093I24Rik	207921	0.140834	0.144265	0.107801	0.195022	0.182979	0.1803	1.42097	0.0115168
Tln2	70549	0.720505	0.657543	0.855032	1.00113	1.06347	1.10807	1.42076	0.00899495
Arsb	11881	0.0428909	0.03	0.0320559	0.046658	0.0480698	0.0543421	1.42043	0.0339518
Ncbp2	68092	0.415805	0.263778	0.370364	0.509583	0.481148	0.500477	1.42027	0.032602
Fam82a2	67809	0.373725	0.358856	0.331036	0.506369	0.538291	0.465818	1.42013	0.00365427
Paip2	67869	20.1924	23.0641	22.2648	32.2533	28.5709	32.2223	1.4201	0.0035479
Psmb5	19173	20.1939	21.1886	18.7093	27.5568	29.7803	27.9987	1.42009	0.00105213
Naa10	56292	7.17341	9.73149	8.61254	10.5111	13.6111	12.11	1.4199	0.0371198
Wars2	70560	0.267125	0.273634	0.26419	0.37046	0.429433	0.34226	1.41891	0.0121467
Gm6637	625931	5.95298	7.06212	7.22052	8.25094	10.1169	10.34	1.41868	0.0217135
Sp110	109032	0.300575	0.357963	0.310149	0.446899	0.460523	0.466516	1.41835	0.00193806
Gm12070	654472	314.587	320.62	275.309	398.24	410.711	482.312	1.41817	0.0130617
Dtx3l	209200	1.43799	1.64474	1.60527	2.08254	2.01705	2.54866	1.41814	0.0217479
Znhit1	70103	7.27022	8.01303	7.0077	8.74995	10.6851	12.1729	1.41797	0.0399902
Rab28	100972	7.3347	8.09192	7.16643	10.4722	10.7129	10.8411	1.41753	0.000496104
Gm7784	665782	250.359	231.951	196.122	309.292	324.276	328.127	1.41753	0.00506507
Oaz2-ps	18247	4.3023	4.7241	4.61748	6.2202	7.40018	5.71861	1.41741	0.020991
Nhej1	75570	1.08675	0.90992	0.876529	1.23693	1.37315	1.45728	1.41562	0.0121629
Pet112l	229487	3.68892	3.05338	2.99173	4.85838	4.82944	4.08968	1.4154	0.0159867
Upf2	326622	2.0049	1.75409	2.07727	2.94891	2.53351	2.77694	1.41518	0.00650808
Hmga1	15361	0.683053	0.804309	0.845913	1.21736	1.16738	0.917231	1.41517	0.0370077
Gm5529	433326	18.0937	18.9781	13.1813	23.0553	26.0338	22.0227	1.41508	0.0326434
Trp53	22059	0.835963	0.897038	0.945807	1.16495	1.22671	1.39842	1.41484	0.00847636
Znrd1	66136	4.18217	4.86751	4.12081	5.26934	6.35957	7.0042	1.41476	0.0313307
LOC100047518	100047518	3.67754	3.86245	3.19495	4.62641	5.41773	5.139	1.41437	0.00831253
Gm5987	546882	14.4823	20.094	16.9487	23.7734	26.4444	22.6498	1.41422	0.0227424
Gpr153	100129	0.580865	0.553411	0.596511	0.755492	0.760464	0.931399	1.41401	0.0156553
Gm10290	100039258	173.988	166.6	131.945	207.593	227.792	232.765	1.41397	0.0123889
Dnlz	52838	8.08981	7.48313	6.99811	9.53838	10.8487	11.5277	1.41397	0.00936151
LOC226574	226574	46.2033	58.9624	45.698	59.1714	76.4849	77.6079	1.41362	0.0478725
Csf1r	12978	0.201307	0.18377	0.22696	0.274075	0.336706	0.254368	1.41356	0.0386375
Gm13937	668797	17.7577	26.1885	23.2815	31.246	33.7189	29.9923	1.41247	0.0268237
2510002D24Rik	72307	0.977676	1.36033	1.34528	1.77633	1.78929	1.63376	1.41161	0.0199042
Glcci1	170772	0.140605	0.0913761	0.134579	0.170136	0.18237	0.164716	1.41102	0.0372941
Mme	17380	0.247533	0.1676	0.197552	0.257336	0.311327	0.29576	1.41088	0.0413537
Vps45	22365	0.788061	0.593835	0.820866	0.980481	1.10053	1.02445	1.4098	0.0189969
Mapk6	50772	0.109522	0.1038	0.104334	0.118832	0.163416	0.165571	1.40976	0.0474414
Cwc27	67285	0.445983	0.716256	0.61542	0.846671	0.892462	0.766625	1.40958	0.0493405
Wdr18	216156	3.24904	3.19246	2.96149	4.59709	4.77333	3.88182	1.40937	0.0109927
Rnf7	19823	14.0407	16.229	15.3227	18.6714	22.588	22.9642	1.40865	0.0147717
Cnih4	98417	1.89665	1.87896	2.49604	2.92775	3.0607	2.8452	1.40851	0.0158302
Hexdc	238023	0.281699	0.392458	0.34653	0.418052	0.534519	0.484942	1.40838	0.0406573
Bat5	193742	4.26479	4.10868	4.0687	5.30206	6.39964	5.81952	1.40821	0.00630649
Nqo2	18105	2.07919	2.94516	2.73491	3.73526	3.9367	3.25455	1.40819	0.032947
Gm8738	667631	67.2078	82.8487	63.7613	88.039	101.545	111.423	1.40777	0.0316506
Gm9481	670250	11.7672	16.5185	13.6914	17.7766	20.6929	20.6193	1.40764	0.027449
Asph	65973	0.912188	0.94293	1.057	1.49929	1.32033	1.27872	1.40734	0.00805988
Arl1	104303	6.79882	6.73733	6.31877	8.55629	10.0906	9.29522	1.40731	0.00450592
LOC637711	637711	0.177691	0.19244	0.195494	0.223602	0.309647	0.262464	1.40678	0.0395388
Ttc32	75516	2.36083	2.83196	3.16076	3.72395	3.93601	4.08726	1.40625	0.0113565
Cdnf	227526	1.54258	1.68765	1.50879	2.16364	2.42374	2.07486	1.40582	0.00560165
Zbtb7a	16969	1.9002	2.01006	1.62072	2.75417	2.67229	2.34863	1.40573	0.011593
Asb8	78541	4.52216	4.37988	4.22678	5.60837	7.16283	5.68393	1.4057	0.0258232
Snap47	67826	3.72397	4.54952	5.02947	5.48856	6.88478	6.32398	1.4055	0.0319731
Mrgprf	211577	0.129084	0.184827	0.202657	0.262484	0.238902	0.224352	1.40492	0.0481799
Commd1	17846	13.0335	15.4684	13.8261	17.9499	20.3642	21.1514	1.40487	0.00892207
Ccdc90b	66365	1.43645	1.40472	1.09188	1.67389	2.10305	1.74766	1.40466	0.0368782
Abhd10	213012	0.913114	1.27616	1.15483	1.61247	1.69633	1.38836	1.40461	0.0328265
Pstk	214580	6.07976	8.23662	6.40141	9.8279	10.4079	8.86157	1.40446	0.026006
Sgk3	170755	14.0768	19.1839	15.4467	19.762	24.551	24.042	1.40338	0.0383311
Rab7l1	226422	0.780524	0.860943	0.999346	1.04818	1.28238	1.37488	1.40314	0.0380211
Cope	59042	14.4813	18.0286	15.6262	21.0827	24.6816	21.7773	1.40314	0.0130721
Mrpl37	56280	4.36218	3.92528	3.37643	5.63395	5.76866	4.96162	1.40298	0.014445
D2hgdh	98314	0.937114	1.00342	1.19525	1.52812	1.62614	1.24431	1.4027	0.038184
Gpr3	14748	0.457874	0.542957	0.452449	0.646502	0.70396	0.688011	1.40267	0.0045448
Slc33a1	11416	0.523933	0.4744	0.67859	0.751042	0.791745	0.809134	1.40252	0.0243735
Ran	19384	1.99115	2.62433	2.97093	3.51825	3.69012	3.43054	1.40237	0.0265789
Lrrc59	98238	0.473013	0.430711	0.420358	0.667586	0.630747	0.558488	1.40235	0.00775183
Ank1	11733	7.32393	7.23284	6.82449	10.8734	9.16019	9.94769	1.40222	0.00522378
Gm6929	628898	6.03334	7.56216	7.93631	9.54986	9.74039	10.9004	1.40214	0.0159371
Smoc2	64074	4.16685	5.05837	5.78548	6.61417	6.68732	7.74474	1.40208	0.0275679
Adk	11534	19.348	19.509	18.2582	26.1005	26.5804	27.393	1.40197	0.000148828
Cyb5b	66427	1.49733	1.1186	1.28819	1.801	1.9103	1.7613	1.40175	0.0114963
Tcfeb	21425	1.24057	1.14114	1.03609	1.69493	1.46517	1.63025	1.40159	0.00716349
Mtfr1	67472	0.921549	0.716944	0.830849	1.27241	1.12876	1.05976	1.40156	0.0185323
Tfam	21780	0.266845	0.344088	0.392765	0.483601	0.466301	0.456741	1.40146	0.0231191
Gtf2e2	68153	1.75279	1.70484	1.87976	2.51739	2.61959	2.34246	1.40133	0.00176448
Copz2	56358	4.59936	3.81548	3.5914	5.11987	5.87565	5.82803	1.40123	0.0148046
Gm4398	100043373	220.36	224.189	180.271	289.348	299.105	286.91	1.40098	0.00454271
Ppp2r5d	21770	0.879834	0.684936	0.817534	1.05439	1.28855	0.994254	1.40082	0.040491
Bcl7c	12055	2.76442	3.39277	3.02457	3.66841	4.23536	4.9576	1.40075	0.0418019
Gm5760	436219	77.5404	73.2123	58.4901	98.3514	100.444	94.2696	1.4006	0.00986004
Cct6a	12466	5.94875	7.08569	6.88244	9.55977	9.05668	9.27839	1.40056	0.00217518
Cby1	73739	1.76976	2.08157	2.1622	2.52611	2.96082	2.93455	1.40042	0.0122041
Gm9083	668277	61.3424	78.802	70.1632	81.2214	103.469	109.802	1.40029	0.0488605
Gstp1	14870	24.1759	23.0482	20.3139	30.8863	29.1205	34.5437	1.39996	0.0101833
Lgals4	16855	9.50815	9.93096	11.4649	14.6687	15.7867	12.8072	1.3999	0.017354
Lynx1	23936	13.5202	17.9231	17.6895	21.2491	23.5869	23.9304	1.3996	0.0169217
Nudt16l1	66911	1.24628	1.33451	1.59	1.71111	2.11615	2.00935	1.39941	0.025118
D930001B02	328087	0.166121	0.138812	0.125724	0.208827	0.171762	0.221761	1.39868	0.0402962
Ccl27a	20301	1.17563	1.27305	1.37893	1.54096	1.98443	1.82698	1.39836	0.0234229
Mif	17319	37.1925	47.3353	40.3358	56.0277	59.8609	58.6789	1.39807	0.00665297
Slc25a39	68066	4.71634	3.80134	3.79456	5.95505	6.09034	5.16651	1.39795	0.0177599
Pdf	68023	2.55594	3.20505	3.43803	4.31101	4.45118	4.0952	1.39769	0.0126302
Celf2	14007	1.51561	1.72398	1.54576	2.29652	2.29561	2.09592	1.39761	0.00243241
Rpl31	114641	0.497484	0.478268	0.451365	0.607993	0.60186	0.784467	1.39745	0.0368652
Timm17b	21855	2.90394	3.18841	2.84975	3.64754	4.45068	4.39347	1.39695	0.0132888
Gm6645	626034	0.176942	0.152286	0.178252	0.256717	0.227694	0.224314	1.39656	0.00727724
Mrps7	50529	1.91817	2.05226	2.18415	2.77922	3.1978	2.61804	1.39653	0.0126191
Nckap1l	105855	0.143625	0.163237	0.190487	0.197681	0.250077	0.246783	1.39649	0.0389147
LOC100046591	100046591	3.92932	5.13475	4.87347	6.07179	6.0469	7.34315	1.39636	0.0308051
Parp3	235587	0.38044	0.347087	0.388633	0.46529	0.545647	0.547621	1.39636	0.00790762
Nptn	20320	5.30893	5.59769	5.31103	7.14088	7.35282	8.14646	1.39602	0.0026182
Sh3bp5	24056	1.29742	1.42612	1.51991	1.89146	2.06998	1.96174	1.39584	0.00249363
Wipi1	52639	1.86796	2.78896	2.48219	3.10731	3.69438	3.16242	1.39571	0.0458937
Cenpb	12616	2.76454	3.46703	3.15836	3.96388	4.34783	4.78862	1.39515	0.0168345
2310061C15Rik	66531	4.0673	4.79727	4.28683	5.53616	6.61838	6.1894	1.39483	0.0105476
Wdr1	22388	3.52225	3.85665	4.56954	5.29461	6.00568	5.35528	1.39395	0.0149759
Ccdc101	75565	2.04178	1.95536	1.67946	2.73748	2.60734	2.56513	1.39343	0.00353441
Mrps36	66128	7.64419	11.6906	9.55095	13.3475	14.5756	12.3255	1.39337	0.0472614
Gm4217	100043084	307.311	298.694	264.274	389.058	409.265	414.054	1.39309	0.00169563
Dlst	78920	22.4113	21.8545	20.4773	30.8664	31.9485	27.3745	1.39304	0.00476156
Crot	74114	3.10727	4.10685	4.52577	5.80447	5.59195	4.955	1.39281	0.0354042
Racgap1	26934	0.10225	0.0790506	0.0978807	0.124608	0.11787	0.146367	1.3928	0.0306505
Gm5710	435752	128.715	111.557	95.6213	153.688	155.812	158.017	1.39186	0.0103959
LOC100046468	100046468	12.1037	17.2387	13.7401	18.8525	19.0328	22.07	1.39164	0.0377398
Mrpl48	52443	14.5637	18.3457	14.5218	19.0495	23.0216	23.9187	1.39127	0.03436
Scfd2	212986	0.991959	1.2027	1.05772	1.49372	1.69948	1.33115	1.3911	0.0264051
Fam3a	66294	0.808824	1.05143	1.10123	1.24315	1.53304	1.34243	1.39073	0.0359095
Nubpl	76826	1.71765	1.58226	1.44267	2.23424	2.05258	2.30806	1.39057	0.00492376
Sirt7	209011	0.315126	0.405406	0.315391	0.428972	0.525555	0.485373	1.38997	0.0305606
Snapc5	330959	4.29649	4.91918	4.57599	5.24042	6.64213	7.28335	1.38967	0.0465971
Gm13642	100040177	3.3589	4.22588	4.18458	4.74877	5.53493	6.06584	1.38916	0.0325635
Abca9	217262	0.939704	1.06895	1.37235	1.62238	1.5842	1.48995	1.38909	0.0308074
Arl1	104303	6.08459	6.50302	7.52582	9.34735	9.84732	8.74351	1.38903	0.00813096
Rnf181	66510	5.76699	6.49837	6.52872	7.94665	9.59069	8.5603	1.38861	0.0107832
Deb1	26901	14.6169	13.6714	11.7844	16.4814	18.5889	20.5682	1.38844	0.0229012
Zcchc17	619605	3.48129	3.33387	3.4017	4.34329	4.94348	4.89339	1.38792	0.00256948
Snx6	72183	1.77972	1.76493	1.97019	2.56744	2.71376	2.37174	1.3877	0.00392016
Gm9568	672572	119.465	108.069	89.2728	141.544	154.399	143.561	1.38729	0.0133537
Lars2	102436	1.56614	1.56186	1.48738	2.22234	2.23951	1.94051	1.38718	0.00402323
Cars2	71941	1.42342	1.0935	1.15034	1.76909	1.69983	1.6175	1.38698	0.0129782
Rps2	16898	114.211	114.361	107.329	138.287	166.001	161.594	1.38697	0.00824787
Gapdh	14433	280.284	262.984	218.939	339.303	358.611	359.193	1.38691	0.00713914
Naip2	17948	0.246496	0.173981	0.238393	0.296173	0.310767	0.306601	1.38653	0.0220442
Isca1	69046	14.3378	14.7061	13.6678	19.0999	21.6138	18.505	1.38647	0.00532059
Gm11829	546828	5.4502	7.6911	6.81445	8.38427	8.97864	10.2994	1.38618	0.0409232
Gm9755	100041265	19.599	17.8689	17.1534	25.4452	26.1834	24.0852	1.38616	0.0017859
Bod1	69556	16.0791	16.7028	16.4219	22.0918	22.8643	23.2077	1.38534	7.34651e-05
Gm6097	619750	6.56927	8.2905	6.36944	9.10214	10.5174	9.789	1.38529	0.0205755
Tubb2a-ps2	627110	1.52968	1.48741	1.48511	1.95626	2.15114	2.1294	1.38528	0.000798932
Wdr45l	66840	1.02083	1.10286	1.1546	1.54872	1.68346	1.30911	1.38526	0.0222897
Serf2	378702	95.5798	103.15	83.0475	119.087	127.711	143.449	1.38495	0.017298
Bad	12015	1.50569	1.44987	1.25839	1.85352	1.9588	2.02268	1.38469	0.00382054
Iah1	67732	1.43875	1.62572	1.29887	1.92484	2.04545	2.07032	1.3844	0.00594591
E130102H24Rik	77866	0.757132	0.734735	0.755491	1.08831	1.03729	0.985139	1.38417	0.000716124
LOC436420	436420	184.404	179.689	157.528	235.925	241.409	244.673	1.38416	0.00152733
Gpn1	74254	1.93848	2.15021	2.05975	2.58591	3.17888	2.74499	1.38406	0.0137212
LOC674079	674079	3.01642	3.95228	3.28651	4.71842	5.33903	4.13545	1.38397	0.0420078
LOC100041034	100041034	0.542291	0.687985	0.652353	0.789731	0.878857	0.936562	1.38378	0.0170373
Mrpl49	18120	2.84115	2.8683	2.82621	4.2339	4.06111	3.51502	1.38361	0.00733464
Gm5224	383218	1.53027	1.71353	1.70534	2.28241	2.29273	2.26959	1.38301	0.00046414
Dhps	330817	1.72287	1.96026	2.13704	2.46617	3.01867	2.56421	1.38296	0.0234217
Wbp1	22377	7.77501	9.13674	10.3232	12.0398	12.7493	12.8699	1.38275	0.011224
Polr2e	66420	10.1822	12.3684	11.4234	14.9978	16.0169	15.9615	1.38271	0.00372595
Exosc6	72544	1.44368	1.12096	1.31849	1.86927	1.75349	1.74587	1.38255	0.00833216
Ahsa1	217737	16.9094	15.039	14.0806	20.186	20.2696	23.1788	1.38249	0.0103591
Sulf1	240725	1.76162	1.81488	1.38385	2.15497	2.1304	2.57205	1.38245	0.0327617
Rgs19	56470	0.468225	0.41051	0.461041	0.537214	0.595883	0.718071	1.3817	0.0388278
Stk38	106504	0.613119	0.562862	0.523728	0.852811	0.805663	0.690006	1.3817	0.0169212
Ppdpf	66496	9.49001	10.2318	10.5571	12.3069	15.0365	14.4815	1.38132	0.0124423
Gm6498	624367	145.011	139.239	119.666	166.117	190.894	200.92	1.3813	0.0163063
Hmox2	15369	10.8563	11.5998	11.0214	14.7416	16.864	14.6363	1.38128	0.00499368
Sft2d2	108735	0.633658	0.649688	0.559573	0.755817	0.904834	0.88413	1.38084	0.0125172
Timm50	66525	5.65217	5.43713	4.82935	6.72562	7.82475	7.42462	1.38046	0.00755893
Acy1	109652	0.866312	0.931222	0.700551	1.01111	1.30889	1.12839	1.38042	0.0456558
Brd3	67382	0.346361	0.254291	0.323563	0.42224	0.430273	0.423101	1.38022	0.0135502
Med27	68975	1.30374	1.37902	1.24961	1.76785	2.01129	1.64833	1.3802	0.0116672
Vps52	224705	0.150862	0.127131	0.161525	0.228366	0.188868	0.189305	1.38001	0.0283404
Mpv17	17527	6.20698	7.78845	7.79304	10.1442	10.7172	9.20667	1.38	0.0159319
1110008L16Rik	66132	0.340067	0.357719	0.365676	0.459957	0.544911	0.462553	1.37985	0.00959892
Sox7	20680	1.22512	1.03472	1.09222	1.29821	1.63688	1.69011	1.37981	0.0347734
Klhl30	70788	1.23881	1.37307	1.45912	2.03785	1.78222	1.79676	1.37972	0.00794442
Cpsf3	54451	3.24548	3.16152	3.01631	4.29327	4.72758	3.98005	1.37965	0.00626652
Med29	67224	3.77601	4.15645	3.88745	5.00256	5.58085	5.72133	1.37943	0.00377398
Chpt1	212862	13.5904	13.6511	13.5119	21.0678	18.5476	16.585	1.37904	0.0165842
Hadha	97212	30.3684	32.3094	32.9048	46.6695	45.6725	39.4627	1.37896	0.00712614
Vamp4	53330	2.69228	2.75866	2.6777	3.39298	3.65776	4.15723	1.37882	0.0103938
Ubiad1	71707	1.44494	1.09241	1.43013	1.79356	1.82409	1.85266	1.37878	0.012602
Pter	19212	0.451112	0.604471	0.641755	0.761774	0.832758	0.745589	1.3787	0.0288835
Wars	22375	4.03251	3.23386	2.84881	4.48355	4.70221	4.75245	1.37795	0.0236424
Pfn1	18643	18.9329	24.0493	22.6794	28.9759	30.31	31.1749	1.37768	0.00755883
Acot7	70025	12.8383	10.3001	10.3694	14.8862	15.5927	15.6824	1.37763	0.00841622
Bbs9	319845	0.398605	0.502883	0.5868	0.668558	0.723506	0.657529	1.37715	0.0323242
Mpv17	17527	11.9482	13.5049	12.8301	16.5803	19.0782	17.0597	1.37706	0.00562712
Sssca1	56390	3.39959	4.46376	4.17041	5.28569	6	5.28256	1.37682	0.0189915
Gm5863	545741	210.738	190.851	149.681	238.322	255.439	265.233	1.37681	0.0242636
A330069E16Rik	606735	0.373642	0.319816	0.265804	0.459168	0.395323	0.465985	1.37655	0.0350323
Ppl	19041	0.649809	0.624421	0.713951	0.806531	0.902917	1.0269	1.37631	0.0225958
Akr1b10	67861	8.16296	6.73813	5.79815	9.79813	9.46267	9.21777	1.37583	0.0215029
Arfrp1	76688	1.19796	0.911403	1.18391	1.37785	1.64147	1.5111	1.37566	0.0266364
Nudt7	67528	11.2112	17.1402	14.9736	20.3281	20.8898	18.3717	1.37541	0.045729
Gm14130	667048	73.3082	67.4001	56.6576	84.9672	96.3714	90.1027	1.37532	0.0137386
Psmb2	26445	7.14094	10.5111	8.5012	11.1263	12.0924	12.7396	1.37491	0.0394967
LOC631981	631981	1.52696	2.04694	2.0426	2.59055	2.76096	2.36975	1.37474	0.0273161
Adam11	11488	0.282014	0.214335	0.237549	0.341492	0.324745	0.342626	1.37467	0.0114037
Hmgb1	15289	4.02757	4.85243	4.74667	5.94231	5.69718	7.07944	1.3737	0.0271455
Ybx2	53422	0.832239	0.942621	0.899086	1.33656	1.1552	1.17856	1.37262	0.00708234
Gm7286	640094	224.881	226.018	184.33	260.703	296.848	314.358	1.37259	0.0195746
Gm8709	667572	71.6068	64.0497	52.497	84.7635	91.0454	82.4301	1.37249	0.0188543
Eef1g	67160	20.1126	17.5759	18.9602	23.8913	27.348	26.5063	1.37242	0.00524592
Enho	69638	1.06512	1.175	1.42118	1.63993	1.68413	1.70029	1.37229	0.0131138
Ppie	56031	2.17858	2.63682	2.45903	3.12161	3.53241	3.32685	1.37205	0.00720753
4930422I07Rik	71640	0.315782	0.334489	0.35088	0.39623	0.537446	0.439632	1.37173	0.0447161
Ddah2	51793	2.26111	3.03056	2.48497	3.25459	3.37592	4.03664	1.37169	0.0446272
2210012G02Rik	66526	0.175384	0.117331	0.17783	0.203984	0.220927	0.220386	1.37139	0.0470474
Mrpl34	94065	8.42534	9.94246	8.11628	11.8748	12.6657	11.777	1.3713	0.00652395
Gm5863	545741	279.825	258.626	195.291	331.222	356.775	318.001	1.37105	0.0310411
Gm2308	100039556	134.288	122.112	110.151	162.349	176.299	163.908	1.37103	0.00534011
Gfm2	320806	2.87908	2.47014	2.88251	4.06864	4.04692	3.17031	1.37102	0.0354365
Timm13	30055	18.5708	22.2463	18.1589	24.1537	28.2792	28.4225	1.37099	0.0187955
LOC676155	676155	3.61303	4.07529	3.88607	4.43246	5.6111	5.82396	1.37092	0.0342306
Rbbp9	26450	0.504135	0.49742	0.598699	0.68989	0.779339	0.724318	1.37075	0.00910025
Aga	11593	1.81364	1.96474	1.41701	2.3121	2.52778	2.28167	1.37074	0.0237582
Apbb1	11785	14.0429	11.9786	9.50291	15.0633	17.7005	15.9275	1.37064	0.0450818
Ccnc	51813	0.656969	0.664235	0.896047	0.913965	1.11127	1.0131	1.37031	0.0477421
1700048M11Rik	73386	0.044781	0.0411152	0.0361517	0.0603773	0.0494932	0.0573692	1.37028	0.0212572
Plekhb2	226971	2.147	1.77024	2.12939	3.07561	2.90512	2.30341	1.37004	0.0478038
5330426P16Rik	68190	0.319048	0.259126	0.257799	0.420976	0.367013	0.357271	1.36997	0.0218903
Vps29	56433	4.98333	6.00977	5.26472	7.06548	7.18776	8.01696	1.36981	0.00942181
Elp3	74195	1.16985	1.06646	1.24354	1.80125	1.54869	1.41637	1.36968	0.0258805
Lix1l	280411	1.01644	1.24534	1.14637	1.78222	1.42294	1.46104	1.36913	0.0334938
Gm8429	667030	19.5594	21.6387	15.4652	24.1572	27.9154	25.4869	1.36878	0.0303939
Gm8513	667204	155.701	150.578	123.422	185.571	202.737	199.831	1.36872	0.00959034
Sirt4	75387	1.23268	1.31579	1.26968	1.67736	1.87492	1.67356	1.36868	0.00267558
Gm8756	667676	203.948	199.73	175.896	252.745	268.388	271.698	1.36795	0.00249119
Tpd52l2	66314	3.09801	3.47821	2.75734	3.7773	4.44915	4.54104	1.36791	0.0228311
Ccndbp1	17151	3.69708	3.97407	3.9347	4.76345	5.60943	5.50268	1.36789	0.00704016
Mrpl49	18120	5.2172	5.46039	5.82124	7.36998	7.67975	7.51374	1.36758	0.000508245
2310004N24Rik	69535	1.01265	1.2698	1.16776	1.42606	1.65833	1.63335	1.36738	0.0157719
Psmd10	53380	1.94935	1.98042	1.97085	2.51318	2.81185	2.74252	1.36724	0.0013478
Clstn1	65945	0.915442	1.09446	1.09628	1.28	1.47427	1.49251	1.3672	0.0137728
Sap25	751865	0.250414	0.347696	0.290594	0.381987	0.400956	0.431981	1.36707	0.026696
Eps15l1	13859	0.969701	0.771316	0.774027	1.21292	1.22067	1.00459	1.36705	0.0333105
Lrch4	231798	0.557272	0.431597	0.48307	0.584046	0.72567	0.701864	1.36662	0.0342981
Gm6981	629557	216.891	219.959	182.206	265.387	279.909	300.493	1.36626	0.00879153
Gm4462	100043475	26.3365	22.52	25.5756	32.6457	33.9465	35.0979	1.36621	0.00264176
Cdc14b	218294	0.53819	0.579454	0.657342	0.745026	0.838657	0.841024	1.36604	0.0100548
Cenpp	66336	0.45978	0.610525	0.488728	0.656726	0.709564	0.762009	1.36514	0.0264854
Snapc3	77634	0.481449	0.531186	0.56832	0.786642	0.686713	0.684634	1.36499	0.0102101
Gm13464	100041245	325.15	319.037	285.195	404.404	415.095	448.974	1.36486	0.00348973
Brix1	67832	0.443205	0.353565	0.477885	0.606789	0.527527	0.605114	1.36463	0.0268504
Rpl27a	26451	5.78038	6.52744	6.69933	7.81208	8.17531	9.94284	1.36424	0.0321905
Vac14	234729	0.816504	1.10093	1.1595	1.39733	1.43982	1.36038	1.3642	0.0261412
Mrpl39	27393	11.3381	11.3239	10.6776	14.1483	16.3094	15.007	1.36369	0.00370162
Gm10313	100039875	233.886	226.454	197.61	291.666	298.099	307.201	1.36327	0.00262654
Gm4795	215974	124.579	120.246	95.5388	153.314	161.808	148.88	1.36325	0.0136741
H2-Q2	15013	22.6656	24.192	20.8226	25.5151	32.8437	33.9046	1.36323	0.043484
Znhit1	70103	9.80001	10.8586	8.94187	11.7443	13.8973	14.7049	1.36304	0.026437
Gcom1	102371	35.272	29.8983	37.0581	47.6448	49.4719	42.223	1.36302	0.0155804
Dusp28	67446	2.57247	3.13334	2.9075	3.86904	4.20476	3.66466	1.36283	0.0100475
Rtn3	20168	3.87102	3.96949	3.57742	5.01005	5.63162	4.91183	1.3622	0.00561099
2610030H06Rik	67048	3.24778	4.29246	3.21927	4.45717	5.15804	5.04024	1.36209	0.0350208
Slc35e2	320541	0.0403227	0.0348521	0.0429149	0.0512066	0.050987	0.0586455	1.36201	0.0146545
Mrpl4	66163	13.0106	12.5098	10.6257	16.3302	16.8364	16.0591	1.36186	0.00459404
Alkbh7	66400	9.25485	12.3551	10.7666	13.4726	15.1706	15.4437	1.36169	0.0229325
Ap2s1	232910	8.72382	11.5872	9.89553	12.2469	14.3705	14.5131	1.36164	0.0303208
Vasp	22323	2.1709	2.22374	2.27387	2.6478	2.95787	3.47181	1.36125	0.029474
Gm5732	435963	257.688	242.671	194.443	303.275	330.119	312.382	1.36122	0.0154396
Rcc1	100088	0.534052	0.45196	0.500603	0.661182	0.65203	0.709723	1.36077	0.00388815
Nutf2	68051	0.905191	0.958266	1.0914	1.41963	1.22842	1.37205	1.3605	0.0112582
Gm5523	433273	211.591	200.975	175.622	252.286	272.78	275.095	1.36038	0.0054061
Mus81	71711	1.14069	1.26797	1.41099	1.80965	1.84795	1.53832	1.36031	0.0213208
Cul7	66515	0.424933	0.545256	0.478768	0.614245	0.632127	0.723673	1.35963	0.0232543
Gm5921	546164	89.9874	91.2422	91.2858	108.778	126.133	135.601	1.3596	0.0142245
LOC674958	674958	243.798	224.825	172.475	278.136	315.006	278.378	1.35942	0.0354285
Cys1	12879	0.20765	0.24041	0.195068	0.306014	0.300053	0.268196	1.35939	0.0126063
Fancc	14088	0.13281	0.117248	0.132429	0.147328	0.178736	0.193677	1.35884	0.034977
Katna1	23924	0.978608	0.880834	0.846435	1.25361	1.13878	1.28427	1.35877	0.00551411
Cmas	12764	1.58481	1.47414	1.49226	1.87386	2.19922	2.11026	1.35861	0.00615291
Cbr1	12408	3.52699	3.62073	3.72164	4.73836	5.12091	4.90799	1.35861	0.000470673
Hmgcl	15356	7.39359	7.42126	7.21369	9.27381	10.0104	10.6439	1.35861	0.00278786
Magee1	107528	0.0598092	0.0826587	0.0856089	0.109034	0.102004	0.0988268	1.3586	0.0349722
Tnfsf13b	24099	0.126438	0.179319	0.135167	0.18868	0.212455	0.197798	1.35836	0.0414054
Med28	66999	6.34236	7.22266	7.27596	8.3515	9.92036	10.0358	1.35827	0.0160992
Rasl2-9-ps	19428	10.353	11.646	10.1129	13.6073	14.8723	15.128	1.35799	0.00460139
Art3	109979	55.3474	69.1525	48.9751	73.5766	82.6468	79.3277	1.35784	0.0337063
Clybl	69634	6.68969	6.01817	4.97868	8.4719	8.10194	7.43771	1.35762	0.0223632
LOC674193	674193	3.04762	3.15607	4.00349	4.60058	4.70794	4.54716	1.35744	0.0164516
Rabl5	67286	0.356501	0.424721	0.410822	0.477838	0.567705	0.572565	1.35742	0.0187666
4833439L19Rik	97820	1.59727	1.45222	1.61865	2.26536	2.32067	1.75034	1.35736	0.042277
Pard6a	56513	0.360088	0.289232	0.32191	0.437288	0.453297	0.427713	1.35735	0.00605178
Telo2	71718	0.306663	0.231098	0.318967	0.401494	0.403911	0.357419	1.35729	0.031243
Mfsd11	69900	0.962419	0.802349	0.808195	1.16245	1.2499	1.07839	1.3567	0.0132311
Gm5446	432730	1.79143	1.85334	1.80251	2.46605	2.41181	2.50972	1.35619	4.57064e-05
0910001L09Rik	66096	12.5433	14.5869	11.0139	14.8356	18.4989	18.3914	1.35606	0.0463032
Stat6	20852	0.991294	0.989861	1.12676	1.30119	1.4245	1.48734	1.35558	0.00658912
Aes	14797	62.1195	65.802	63.072	81.9647	86.4178	90.5065	1.35549	0.00111158
Lmf1	76483	0.669591	0.673581	0.497036	0.908439	0.831236	0.75403	1.35512	0.0410779
Oaz1	18245	71.3756	87.5235	77.331	107.935	103.605	108.571	1.35508	0.00489602
Sbno1	243272	2.3038	1.81302	2.47273	3.32631	2.7984	2.80352	1.35491	0.0419525
Aldoa	11674	258.531	276.283	256.338	327.802	366.285	377.645	1.35465	0.00462196
Cnih	12793	10.8945	14.8994	13.3704	16.6019	17.3623	19.0894	1.35465	0.0284075
Glod4	67201	4.56286	5.4652	4.30683	6.11674	6.62009	6.67995	1.35451	0.0126631
Isca1	69046	22.7375	23.3323	22.0771	29.7054	33.2468	29.3403	1.35432	0.00343502
Triap1	69076	2.89929	3.41961	2.90364	3.90699	4.53373	4.04693	1.35404	0.0132696
Pfkm	18642	34.8863	33.6663	35.4798	47.3929	49.0493	44.3905	1.35374	0.00111046
Gm11214	667451	81.5269	76.4332	55.0956	93.3211	101.294	93.7477	1.35346	0.0418373
Irf3	54131	5.40678	4.29665	5.13954	5.71628	7.17825	7.1927	1.35332	0.0420777
Egln3	112407	0.775194	0.772326	0.893735	1.2812	1.00736	1.01509	1.35326	0.0433216
Arf5	11844	6.50935	7.14247	6.17812	8.55037	8.70713	9.56039	1.35239	0.00528289
Trim47	217333	4.14184	3.44439	3.57615	4.83826	4.91198	5.34563	1.35239	0.00788933
Snap23	20619	1.72922	1.53194	1.50946	2.27953	2.25917	1.91048	1.35186	0.0156533
l7Rn6	67669	6.64205	8.92776	8.11999	9.84033	10.8958	11.2871	1.35178	0.0251867
Cops8	108679	4.84441	5.02222	5.21215	6.25374	8.02812	6.09063	1.35107	0.0486459
2010007H12Rik	69871	1.60641	1.38786	1.45251	1.75377	2.12688	2.1254	1.35065	0.0206231
Apobec2	11811	12.2378	11.6137	9.46018	14.5266	16.2695	14.1934	1.35056	0.0213091
Cisd1	52637	53.2739	66.9842	48.8022	72.9486	81.1336	74.231	1.35048	0.0306561
Ppp1r8	100336	1.43687	1.42625	1.61422	1.95207	1.95404	2.13996	1.35037	0.00388516
Tspan9	109246	0.765167	0.761873	0.821067	1.02439	0.952701	1.19368	1.35035	0.0207123
Zfp637	232337	2.05795	2.12992	1.95942	2.72315	2.97592	2.6016	1.3503	0.00402495
Ccdc47	67163	2.42735	2.17088	2.41159	3.10098	3.37084	2.99169	1.35004	0.00427341
Dtna	13527	2.704	3.12725	3.13991	4.16944	4.16177	3.78002	1.35002	0.00554906
Arf4	11843	6.36905	6.91264	7.42314	9.28482	9.25474	9.41222	1.35001	0.00142994
Marveld1	277010	1.93777	1.83044	1.86965	2.6108	2.44488	2.55514	1.34995	0.000344148
Gm5069	277333	84.347	78.3056	69.18	103.682	108.425	100.668	1.34914	0.00551556
Tmem50b	77975	3.20319	2.80695	3.02417	4.40873	3.99653	3.7829	1.3491	0.00830003
Flad1	319945	3.4548	3.85661	3.50181	4.70284	5.45568	4.42794	1.34895	0.019361
Ndufs8	225887	46.726	50.1404	35.9573	59.2998	58.6469	61.2251	1.34894	0.0236493
Csnk1g2	103236	3.8913	3.23638	3.28369	4.31872	4.82389	4.89948	1.34873	0.0122356
Ccl27a	20301	0.875807	0.894549	0.980868	1.22703	1.25026	1.23335	1.34872	0.00064103
LOC674321	674321	4.72063	5.00043	4.18675	6.16031	6.56178	6.03516	1.34868	0.00487063
Prss36	77613	0.670623	0.682901	0.643536	0.83487	0.964175	0.893785	1.3484	0.00406556
Tubb2c	227613	20.4402	20.9761	26.647	27.8746	29.9172	33.9506	1.3479	0.0417152
Nrtn	18188	6.80373	7.99719	5.76262	8.58009	9.21108	9.91919	1.34755	0.0340026
Nudt19	110959	2.4206	2.8959	2.62172	3.3001	3.86289	3.534	1.34753	0.0125911
1500002O20Rik	71997	0.12711	0.0951724	0.10431	0.152328	0.148866	0.138834	1.34733	0.021524
0610031J06Rik	56700	3.69132	4.06784	3.84801	4.77855	5.49836	5.36002	1.34718	0.00547548
Lrpap1	16976	7.4445	8.37478	8.23008	9.8937	11.4219	11.0723	1.34672	0.0069909
Tmem160	69094	16.3845	21.1926	16.1221	22.324	23.5751	26.3857	1.34611	0.038482
Chac2	68044	1.25139	1.47175	1.26636	1.93962	1.78015	1.65013	1.34601	0.0138094
Emg1	14791	10.2655	9.97406	9.28442	11.2776	13.2608	15.1915	1.34568	0.0434236
Mrps9	69527	7.30434	8.04862	6.14927	9.86358	10.1745	8.8924	1.34547	0.0213313
Gm5747	436085	1.69035	1.50192	1.51956	2.1363	2.24316	1.95862	1.34514	0.00612424
Ppp1r16a	73062	1.51861	1.4394	1.57999	1.70291	2.15055	2.24906	1.34476	0.0393173
Gm9522	671215	95.0051	85.9207	72.6408	111.938	117.846	111.091	1.34432	0.0130594
Fam96a	68250	8.19745	11.5165	9.71125	11.8111	13.9524	13.79	1.34421	0.0459599
Gm5652	435292	96.9681	91.4475	67.2414	116.657	120.373	106.625	1.3442	0.0427971
Gm3809	100042375	303.876	278.557	241.564	339.682	384.244	383.513	1.34398	0.015486
Vps25	28084	4.39514	6.01374	5.3035	6.74521	7.74487	6.62341	1.34375	0.037571
Akr1c14	105387	0.318371	0.357146	0.447951	0.527422	0.493054	0.489064	1.34364	0.0330678
1110054M08Rik	68841	2.57546	2.1918	2.13727	3.18331	3.06007	3.03369	1.34362	0.00554407
Gm8565	667309	101.472	101.904	84.0639	118.055	131.555	136.529	1.34337	0.0150832
Ube2g2	22213	1.95358	1.58008	1.53381	2.23465	2.23401	2.33797	1.3432	0.013453
Tmem126b	68472	2.69856	2.86212	2.83806	3.77542	3.59023	3.91514	1.34315	0.000852386
5133401N09Rik	75731	3.37371	3.48335	2.83456	3.94587	4.50642	4.56348	1.34299	0.0169385
Mettl3	56335	1.04278	0.797268	1.09403	1.21084	1.3412	1.38802	1.34286	0.0338932
Bcs1l	66821	0.891628	0.941172	0.929852	1.21279	1.3222	1.17466	1.34279	0.00249616
Mrpl4	66163	12.926	12.6626	9.6889	15.5909	16.1388	15.6388	1.34274	0.0186357
Naa35	78689	6.66322	6.95557	7.44788	8.97959	10.3323	8.96875	1.34244	0.00903792
Sh3glb2	227700	4.13651	5.10492	5.94143	7.41503	6.55818	6.40284	1.34204	0.0467737
Ssbp1	381760	0.635642	0.65599	0.532146	0.796595	0.839561	0.811185	1.34191	0.00674693
Csrp3	13009	200.229	205.435	189.27	252.449	251.353	294.522	1.34187	0.0106302
Dld	13382	21.5937	21.0965	17.5675	28.6487	28.172	24.0234	1.34164	0.0240741
Esco1	77805	0.850163	0.59463	0.675398	1.01573	0.876536	0.95218	1.3416	0.0476092
Sdcbp	53378	5.25146	5.59324	5.93215	7.3687	7.66275	7.47606	1.34158	0.000878088
Gapdh	14433	291.348	268.502	231.135	338.714	360.682	361.698	1.34148	0.00918626
Ier3	15937	1.94135	1.71879	1.50122	2.31162	2.41527	2.1948	1.34106	0.0145103
Sh3bgr	50795	12.6157	11.8662	8.95292	14.4039	13.9572	16.4738	1.34096	0.0490847
Lgals4	16855	8.12675	8.54811	9.97178	12.0816	12.8318	10.8025	1.34035	0.0205811
Bphl	68021	4.06065	4.03903	4.06641	5.40441	6.11827	4.77674	1.33974	0.0237041
Gm5943	546362	0.524048	0.657463	0.705485	0.787	0.865745	0.875122	1.33963	0.0249098
Mrpl47	74600	0.235108	0.287532	0.300444	0.400239	0.353374	0.348741	1.3393	0.0228115
Ppp1r16a	73062	0.578363	0.468803	0.610645	0.684655	0.797201	0.737231	1.33856	0.0254794
Ech1	51798	388.785	363.059	305.077	455.288	463.902	494.963	1.33799	0.0123977
Abcb8	74610	1.40719	1.62385	1.42574	2.11374	2.04512	1.80264	1.33762	0.0128136
Gm13886	668744	4.31803	4.5735	4.58985	6.36642	5.63312	6.03148	1.33748	0.0027181
Bcap31	27061	7.19336	8.76178	8.34347	10.3142	10.4179	11.7658	1.33744	0.0145243
Klhdc1	271005	1.77155	1.58376	2.04435	2.2964	2.53234	2.39241	1.33734	0.0155869
Rpl15	66480	3.19766	3.99375	4.76177	5.28485	5.49644	5.20154	1.33712	0.0432407
1700106N22Rik	73582	0.131563	0.153012	0.152745	0.183584	0.215735	0.184915	1.33594	0.0181154
Ebna1bp2	69072	0.44689	0.535949	0.57723	0.718865	0.62686	0.738383	1.33591	0.0276336
Gm13077	100043284	3.88045	3.85901	3.97259	4.69183	5.68218	5.27212	1.3359	0.0105668
Ciao1	26371	5.727	5.56419	5.88111	7.30937	8.22172	7.40763	1.3358	0.00317302
Acaa1b	235674	4.14831	3.89549	3.92153	4.82391	5.43104	5.72784	1.33576	0.00852721
Tmtc4	70551	0.278947	0.314944	0.327578	0.370155	0.429348	0.43116	1.33554	0.0141463
Ank3	11735	0.545378	0.467431	0.439721	0.6946	0.57063	0.674306	1.33528	0.0309762
Samm50	68653	19.1825	19.1548	17.011	23.1066	26.3043	24.4691	1.33482	0.00622626
Prkrir	72981	1.59443	1.57006	1.97377	2.39793	2.4549	2.00269	1.33421	0.041398
Ndufs7	75406	115.955	133.73	103.716	155.187	161.63	154.563	1.33384	0.0119794
Ghitm	66092	38.1188	34.3027	30.9628	47.908	42.8956	47.0779	1.33368	0.011253
Gm7191	636859	131.775	127.246	104.735	154.257	163.513	167.292	1.33348	0.0117987
Gm6981	629557	213.302	209.629	182.261	255.098	268.431	283.366	1.33329	0.00619741
Hsbp1	68196	19.6472	24.3008	19.3813	26.7853	26.9933	30.634	1.33292	0.0256961
Hrc	15464	74.6216	82.6599	69.6458	96.9361	93.877	111.653	1.33288	0.0195137
Tspan17	74257	0.733178	0.799359	0.729781	0.938108	1.04033	1.03674	1.33278	0.00342744
Cops7a	26894	4.28416	4.60405	4.75428	5.85006	6.37712	5.95197	1.33254	0.00207041
Stat2	20847	0.92345	0.918262	0.954631	1.09941	1.26635	1.35961	1.33223	0.0158099
Lrrc24	378937	0.0996643	0.0705067	0.0817461	0.112375	0.107833	0.115311	1.33186	0.0335503
Mvp	78388	2.49266	2.0981	2.11564	3.01964	3.05032	2.8614	1.33177	0.00631526
Mpnd	68047	4.00827	3.71999	3.56632	4.33946	5.6172	5.0843	1.3317	0.0334904
Nfu1	56748	5.98405	8.04597	7.10167	9.63866	9.43574	9.05999	1.33138	0.0196463
H2afz	51788	14.8322	15.4183	14.4427	18.4661	18.8715	22.1563	1.33116	0.0148113
Gm5069	277333	95.8554	88.962	79.0352	110.303	124.177	116.661	1.33082	0.00998812
Hdhd2	76987	2.22375	1.71324	2.10137	2.98139	2.6455	2.40771	1.33059	0.0425675
Hnrnpul2	68693	1.60977	1.88178	2.2568	2.50134	2.45928	2.68607	1.33024	0.0340984
Map2k1	26395	2.64807	2.64448	2.82197	3.63494	3.80833	3.35064	1.3302	0.00358894
Eif2s3x	26905	3.50645	3.19083	3.86807	4.79659	4.78808	4.46686	1.32996	0.00654306
Gm15770	666788	8.08572	9.26479	7.54352	11.0985	10.7467	11.2594	1.32982	0.0066875
Eral1	57837	0.511836	0.529184	0.577215	0.763164	0.745248	0.643206	1.32961	0.0135167
Vps29	56433	5.22501	6.16611	5.68453	7.21228	7.52595	7.96365	1.32949	0.00574972
Sdhb	67680	126.138	137.797	108.843	161.82	162.51	171.235	1.32939	0.0101971
Alg3	208624	0.633266	0.801264	0.790204	0.928604	1.09719	0.931422	1.32925	0.0348728
Gm6097	619750	24.0489	30.8684	25.9644	33.7053	34.8901	38.914	1.32922	0.0259894
Gm12182	667163	218.927	216.619	180.378	264.41	267.851	286.405	1.32917	0.00897568
Gm7129	634019	121.166	114.631	94.4767	147.242	154.006	137.732	1.32914	0.0176978
Ndrg2	29811	103.474	84.918	72.4581	120.566	119.524	106.589	1.32904	0.0468142
Rnmtl1	67390	2.37877	2.35934	2.00763	2.9723	3.09226	2.90046	1.32899	0.00510903
Zmynd19	67187	0.318746	0.339127	0.345983	0.42245	0.447947	0.463713	1.32899	0.00163175
Pin1l	241593	2.76067	2.67387	2.50787	3.12914	3.76499	3.65584	1.32831	0.0143528
BC004004	80748	37.0766	42.1936	44.3517	49.1569	57.3248	57.7182	1.32824	0.018541
Gm6283	622075	187.471	177.255	150.034	218.482	233.011	232.2	1.32818	0.00970718
Mrpl53	68499	16.1258	17.0111	13.8577	19.6526	21.5329	21.2303	1.32815	0.00965524
Gm7250	638791	7.75117	10.4069	9.33759	11.7573	12.1484	12.6066	1.32793	0.020607
Trit1	66966	0.481495	0.62469	0.590028	0.728597	0.814784	0.709025	1.3279	0.0264512
Ppp1r9a	243725	0.661106	0.751666	0.859133	1.10671	0.990785	0.918879	1.32768	0.0350485
Rsrc2	208606	6.21613	5.93171	7.37925	8.67884	8.56936	8.67345	1.32747	0.00865858
Rfng	19719	0.134778	0.115171	0.11477	0.156305	0.153417	0.174336	1.3272	0.0128623
Add1	11518	1.208	1.02922	1.24836	1.40277	1.68594	1.53717	1.32715	0.0229989
Mapk3	26417	6.62664	6.22654	6.4699	7.53759	9.01206	9.091	1.32694	0.0153205
Flnb	286940	1.37046	1.34575	1.59938	1.84284	1.8084	2.07237	1.32627	0.0153863
Gpaa1	14731	0.609466	0.625425	0.625728	0.793018	0.870571	0.803975	1.32621	0.0012328
Hadh	15107	58.1928	59.7687	64.1045	92.1905	80.3084	68.9464	1.32614	0.0462892
Ywhaz	22631	3.49826	3.52144	3.48514	4.73084	4.92199	4.27609	1.32595	0.00400571
Ap2m1	11773	6.70044	6.70864	7.02079	9.25879	9.6774	8.15087	1.32586	0.00898964
Gm3534	100041831	191.02	185.836	163.159	227.814	247.612	240.534	1.32581	0.00475128
Nutf2	68051	10.7233	14.1099	13.688	15.8892	17.9688	17.2138	1.32581	0.0270174
Tbc1d2b	67016	0.42042	0.40279	0.515477	0.595504	0.524758	0.654574	1.3258	0.0471844
Lyrm5	67636	8.41386	10.0167	8.53365	12.5035	12.3725	10.8701	1.32569	0.016366
Ifitm7	74482	0.172649	0.152502	0.202177	0.207817	0.237305	0.253701	1.32522	0.0440715
Pop5	117109	5.5474	6.23087	5.10982	7.07525	7.65191	7.65263	1.32518	0.00843687
Slc25a11	67863	29.6255	36.2173	31.2573	42.5695	46.4329	39.668	1.32513	0.0195077
Fundc2	67391	2.55655	2.87531	2.72166	4.0544	3.63678	3.11265	1.32505	0.0372166
Myg1	60315	1.94042	2.09661	2.06231	2.23542	2.95701	2.88887	1.32495	0.0481624
Sort1	20661	0.0867992	0.085211	0.0808386	0.10708	0.102874	0.124923	1.32442	0.0173666
2310030N02Rik	76947	1.78042	2.26414	1.78861	2.72696	2.55113	2.44739	1.32441	0.0245855
Wdr20a	69641	1.39111	1.82174	1.4359	1.99243	2.22917	1.9347	1.32429	0.0373096
Tubgcp4	51885	0.274057	0.207364	0.286488	0.357072	0.349268	0.310381	1.32401	0.0436553
Nfxl1	100978	0.303304	0.236226	0.264897	0.337247	0.341739	0.385848	1.32372	0.0250851
Hnrnpk	15387	10.845	12.7418	11.1298	16.7678	15.5014	13.6845	1.32368	0.0250381
Polr2e	66420	11.3441	14.1575	12.4869	15.3307	17.9904	16.9624	1.32365	0.0219457
Ube2l3	22195	7.89221	7.34786	7.66959	10.7233	9.95562	9.64203	1.3235	0.0023112
Psmd13	23997	9.43424	8.70668	9.33399	11.7144	13.2569	11.3819	1.32314	0.00886109
Oxsr1	108737	3.42253	3.21587	3.62233	4.65876	3.98751	4.92563	1.3227	0.021852
Rdm1	66599	15.8029	13.6729	12.9966	16.7696	19.2243	20.1837	1.32268	0.0259386
Flad1	319945	2.63919	3.06167	2.7961	3.59579	4.30733	3.33276	1.32234	0.044655
H2-D1	14964	34.1057	38.3988	32.8234	40.2945	48.3205	50.6551	1.32225	0.0336508
Arid4a	238247	0.643017	0.654462	0.68813	0.911242	0.835084	0.879114	1.32223	0.00118513
Mapre2	212307	3.27097	3.96252	3.39206	4.93934	4.81044	4.29863	1.32214	0.016922
Top1mt	72960	0.647248	0.518621	0.681535	0.789544	0.860715	0.792251	1.32213	0.0223377
Tmem42	66079	1.75631	1.6739	1.27807	1.88251	2.23214	2.10808	1.32166	0.0482889
Yeats4	64050	1.17364	1.01311	0.846013	1.31999	1.41263	1.27531	1.32155	0.0341847
St13	70356	6.49894	5.25966	5.38419	8.02552	7.20411	7.41621	1.32101	0.0168401
Pmpcb	73078	17.2175	16.0431	15.0639	21.885	21.8522	20.0991	1.32099	0.00381499
Phf23	78246	2.26284	2.02834	1.54416	2.49778	2.69029	2.52001	1.32093	0.0470863
Gm10731	100039043	12.9019	15.3192	11.5234	16.8556	16.7551	18.8872	1.32088	0.0314349
Tmem93	66048	3.23477	3.09912	3.10989	4.20237	4.09818	4.17253	1.32077	4.6178e-05
Trim79	209387	0.326865	0.284467	0.357889	0.412982	0.423937	0.442838	1.3204	0.0108135
Rpain	69723	2.11932	1.95122	1.8539	2.24509	2.72147	2.85284	1.31985	0.0343652
Eml1	68519	1.23814	1.05773	1.43308	1.68858	1.72023	1.51187	1.31959	0.0346651
Stxbp3b	619371	0.521528	0.516801	0.593777	0.737776	0.772662	0.642985	1.31941	0.0195569
Eif3i	54709	14.8591	16.0987	14.4834	18.4532	19.4244	22.0722	1.31928	0.0151462
Gm12070	654472	274.528	258.22	231.975	325.853	346.348	336.682	1.31928	0.00406549
Tcf3	21423	0.552876	0.494316	0.520946	0.63297	0.667832	0.767313	1.31884	0.0188289
Pafah1b2	18475	0.623858	0.610639	0.767059	0.881318	0.803159	0.954988	1.31871	0.0330643
Nup43	69912	0.966667	0.997473	1.13547	1.25564	1.36971	1.46166	1.31855	0.0140867
Pcyox1	66881	0.650683	0.615974	0.722622	0.8963	0.913889	0.812742	1.31853	0.00883218
9530082P21Rik	638247	0.309468	0.293041	0.299959	0.417339	0.390957	0.381607	1.3185	0.00121518
Gm8170	666571	149.562	147.701	126.519	163.655	185.64	209.306	1.31813	0.0409875
Cdkn2aipnl	52626	0.959221	1.10439	1.17296	1.28397	1.56023	1.42168	1.31802	0.0278919
Dusp16	70686	1.36925	1.21196	1.34505	1.95894	1.47098	1.74496	1.31802	0.049562
Rpl21	19933	0.361056	0.368639	0.342926	0.460714	0.443142	0.509009	1.31721	0.00580459
Zc3hc1	232679	1.90825	1.96295	2.06841	2.34722	2.78934	2.68614	1.31704	0.0113883
Nsa2	59050	11.7036	13.8726	13.0753	15.0238	18.1107	17.7633	1.31684	0.0247218
Psip1	101739	1.53337	1.45691	1.72575	2.2146	1.91025	2.08389	1.31652	0.0139135
Tex261	21766	2.31032	2.03694	1.62176	2.50835	2.74471	2.60393	1.3163	0.0409847
Gm10293	100039762	353.091	338.039	299.102	422.024	450.777	430.553	1.31621	0.00458425
Cuta	67675	14.8216	18.4181	17.1392	20.9745	23.5764	21.7514	1.31607	0.0152489
Oaz1	18245	70.9177	81.7151	76.4534	99.683	98.4696	103.196	1.31544	0.00215233
LOC100044854	100044854	0.557241	0.599936	0.750336	0.824425	0.87904	0.804614	1.31484	0.0330422
Alkbh7	66400	4.65085	5.68052	4.48001	5.97544	6.64554	6.85173	1.31471	0.0276287
Rexo2	104444	5.71628	5.01117	4.18618	6.40837	6.33173	6.86507	1.31458	0.0296538
Adi1	104923	1.04126	1.15326	1.33064	1.6446	1.53903	1.45045	1.31457	0.0217397
Gm7722	665632	47.9624	57.3928	52.3273	58.6987	73.5241	75.0446	1.31446	0.0483367
Mgat4b	103534	3.27539	2.59907	2.7626	4.07085	3.99616	3.28568	1.31441	0.0485408
Cdkl1	71091	0.607056	0.75198	0.729332	0.975014	0.816211	0.952376	1.31375	0.0310476
Set	56086	5.72033	5.88771	5.52378	7.54324	7.25039	7.71032	1.31358	0.000466469
2310003C23Rik	76425	2.74803	2.90033	2.32884	3.44578	3.81553	3.21545	1.31334	0.0270584
Tmem123	71929	3.29329	3.38137	3.59465	4.69216	4.35438	4.43029	1.31234	0.00141122
Traf4	22032	0.325138	0.270795	0.28157	0.377311	0.37377	0.400483	1.31232	0.00798507
Tomm22	223696	8.59995	11.709	10.3913	13.1535	13.5356	13.5844	1.31183	0.024851
H2afv	77605	11.6571	11.85	11.2935	13.1814	15.1473	17.3167	1.31163	0.0399759
Mrm1	217038	1.62955	1.20546	1.35598	1.84416	1.91463	1.7376	1.31148	0.0317274
Pgls	66171	10.4001	13.2923	10.9614	14.2879	16.6358	14.5233	1.31146	0.0359938
Ptcd3	69956	11.4026	12.7404	13.9927	17.2786	17.2971	15.4372	1.31144	0.01505
Rpl28	19943	86.9014	97.2498	85.0417	100.71	121.609	130.701	1.3114	0.044402
1110008P14Rik	73737	8.77695	10.9604	8.72117	11.4009	12.5137	13.4052	1.31137	0.0345398
Diablo	66593	3.45949	3.48889	3.28921	4.6369	4.74214	4.04547	1.3113	0.00924485
Thoc6	386612	1.40168	1.72222	1.66013	1.91256	2.10202	2.25671	1.31088	0.0238672
Slc30a9	109108	3.41446	2.84491	2.94802	4.39508	4.13994	3.53358	1.31075	0.0369817
Msl1	74026	3.56714	3.03443	3.10035	4.10304	3.88728	4.72599	1.3107	0.0292489
Sec13	110379	6.73657	8.19867	7.35637	9.30541	10.2426	9.66321	1.31041	0.0102151
Tmem70	70397	15.5583	14.8617	14.5778	20.1516	20.1219	18.6838	1.31022	0.0011871
Cxx1b	553127	14.4256	18.1035	16.539	19.863	23.9616	20.4524	1.30996	0.0382233
Zfp768	233890	3.43736	3.85817	3.68791	4.29322	4.76227	5.33118	1.30985	0.0248739
Gm2451	100039840	247.886	243.88	217.339	294.048	303.66	331.08	1.3098	0.00751921
Gcsh	68133	7.98991	8.76164	7.85472	10.5879	11.0926	10.548	1.30977	0.00157425
Gm11263	667922	59.1954	63.5717	62.1161	70.8078	83.8084	87.5022	1.30957	0.0217276
Pdrg1	68559	15.5642	14.3847	11.5796	17.1314	18.0914	19.1575	1.30947	0.0314152
Casp8	12370	1.14194	1.19732	1.50767	1.64567	1.69047	1.69926	1.30894	0.0261868
Hook3	320191	0.624722	0.577275	0.68376	0.886579	0.77586	0.805851	1.30891	0.0126723
Nudt22	68323	2.2453	2.4626	2.12556	2.70187	3.24317	2.9993	1.3089	0.0190504
Ddx47	67755	4.87788	4.4261	4.31831	5.87939	6.31578	5.62257	1.30798	0.00619668
Ruvbl1	56505	3.719	3.78614	4.21222	4.95312	5.29594	5.07427	1.30775	0.00284778
LOC677301	677301	69.8644	68.3577	56.2577	81.2284	89.527	83.5617	1.30768	0.0159001
Sumo2	170930	11.6048	15.1517	13.451	18.0659	15.9487	18.5633	1.30766	0.033843
Tmem150a	232086	0.806058	0.757463	0.762341	0.983036	0.973389	1.0844	1.3074	0.00353597
Ndufb5	66046	17.1395	21.387	17.4612	23.02	23.7849	26.3509	1.30664	0.0279724
Ibtk	108837	1.61805	1.44911	1.84764	2.32275	1.96552	2.13289	1.30649	0.0316102
Lancl2	71835	0.327685	0.300657	0.408853	0.466173	0.464507	0.424233	1.30633	0.03988
LOC677637	677637	66.8757	62.47	48.2045	77.9172	82.3642	71.6306	1.30618	0.0480875
Apeh	235606	3.40137	3.05852	3.3922	4.15369	4.88728	3.82523	1.30594	0.0394766
Gm12933	620877	66.6578	64.602	61.5628	78.8554	88.4569	84.5005	1.30593	0.00337469
Gm12969	667354	119.047	108.075	101.526	141.844	149.074	138.132	1.3055	0.00517897
Dync1i2	13427	8.33054	9.4308	9.56514	11.7573	11.8888	12.0141	1.30497	0.00221692
Rpusd4	71989	1.43105	1.42256	1.48303	1.96441	1.98148	1.71142	1.30454	0.0078855
Taf10	24075	12.9783	14.8596	13.6741	16.747	18.0309	19.3751	1.30451	0.0108335
0610011F06Rik	68347	2.93146	2.80756	3.39099	3.95594	3.97235	3.98165	1.30448	0.00644146
Ccdc53	67282	4.81923	5.99158	5.01836	6.04253	7.23089	7.37505	1.30446	0.0446582
Pcyox1	66881	3.12594	2.94246	3.88677	4.53841	4.32562	4.12176	1.30443	0.0320862
Wdr36	225348	0.545304	0.58087	0.661702	0.789306	0.863582	0.679048	1.3043	0.0465697
Tppp3	67971	4.30345	4.51013	3.72199	5.05127	5.23791	6.05435	1.30377	0.0307429
Gm9132	668368	20.4737	18.749	17.4723	22.8815	25.7478	25.2691	1.30344	0.00989782
Ppm1j	71887	1.04488	1.15915	1.15208	1.46287	1.38919	1.5224	1.30343	0.00313729
H2-Ke6	14979	14.7439	15.2133	15.1027	18.1287	19.488	21.0984	1.30305	0.00637287
Bud31	231889	3.7756	4.17948	3.23155	4.35875	4.93228	5.28484	1.30297	0.0426382
Gpatch8	237943	0.273616	0.250075	0.293188	0.363765	0.343658	0.356601	1.30255	0.00393656
Tubd1	56427	0.341399	0.298559	0.389925	0.404869	0.475367	0.461151	1.30247	0.0380693
Gm14457	436190	0.255373	0.306279	0.341891	0.357366	0.429282	0.39012	1.30239	0.0491016
1110002N22Rik	68550	1.56874	2.09981	1.87465	2.38236	2.5514	2.28532	1.30233	0.0316769
Dnmt1	13433	0.446477	0.423168	0.457516	0.530191	0.582341	0.615793	1.30227	0.00763151
Ets1	23871	2.11304	1.85516	2.03886	2.47458	2.34289	3.00466	1.30216	0.0489434
Ppox	19044	1.17948	1.23089	1.38447	1.52531	1.8033	1.61112	1.3017	0.0205422
Tpd52	21985	1.21133	1.43579	1.43856	1.75324	1.87386	1.69106	1.30166	0.0113017
Grcc10	14790	63.9575	72.1777	62.4953	77.9395	83.9675	96.6315	1.30161	0.0335171
Pofut2	80294	1.62489	1.26198	1.51855	1.83718	1.90226	1.9946	1.30159	0.0193445
Rnf181	66510	3.72697	4.30841	4.44689	5.24043	5.88723	5.11286	1.30109	0.0183653
Dbnl	13169	1.57192	1.51649	1.88476	1.96269	2.37759	2.12915	1.30087	0.0400163
Refbp2	56009	3.10714	3.9297	3.80168	4.31781	4.76413	5.01671	1.30079	0.0293393
Vav3	57257	0.137826	0.149567	0.180457	0.21093	0.198602	0.199036	1.30078	0.024532
Pkdrej	18766	0.0592442	0.0571811	0.056695	0.063147	0.083608	0.0783576	1.30032	0.0487084
Acaa2	52538	150.697	163.713	160.103	219.672	216.382	180.847	1.30007	0.0218668
Vps39	269338	0.439377	0.464213	0.600086	0.624662	0.677979	0.651157	1.29935	0.0454345
Haus8	76478	3.15143	2.78985	3.23289	4.10623	3.8351	3.978	1.29923	0.00432333
Dap3	65111	15.4185	13.0514	12.1041	17.3201	18.1382	17.2502	1.29907	0.0169265
Itm2c	64294	9.66534	9.6195	9.46768	11.4202	13.1354	12.7781	1.29845	0.00554488
Gm5525	433283	22.6563	19.765	21.0175	23.9339	29.5869	28.8306	1.29812	0.0323708
Slc25a19	67283	1.48754	1.44169	1.43474	1.84924	1.95583	1.85971	1.29808	0.000327972
Frmd4b	232288	0.237252	0.254682	0.269083	0.340998	0.345343	0.301304	1.2978	0.0107699
2410091C18Rik	73694	3.83557	4.21486	3.7029	4.89669	5.54166	4.80738	1.29714	0.0137598
Ppil2	66053	3.63124	4.10668	4.46827	4.87131	5.60355	5.35744	1.29707	0.0203027
Cct3	12462	5.45132	5.64061	5.23647	6.99504	7.30669	6.87652	1.29702	0.000737602
Gm4116	100042937	0.252271	0.274076	0.264207	0.343977	0.358612	0.322622	1.29683	0.00304453
Sars2	71984	0.870186	1.08487	1.07106	1.25363	1.46134	1.20614	1.29575	0.046372
Gm5786	544872	120.046	119.107	99.8085	134.396	158.012	146.766	1.29565	0.0244279
Sbk1	104175	3.04693	2.70234	2.57813	3.94883	3.38475	3.4534	1.29536	0.0223181
LOC235882	235882	0.115691	0.115964	0.114693	0.141059	0.143098	0.164376	1.29503	0.0103199
Mtch2	56428	27.2423	30.3003	26.4885	35.0185	37.3122	36.4801	1.29489	0.0035601
Coq4	227683	2.28985	1.8811	2.02676	2.6002	2.79333	2.63037	1.29466	0.0104225
Ict1	68572	12.1531	14.4454	12.8826	15.5051	18.1828	17.4129	1.29431	0.0206763
Tmem223	66836	20.6345	23.3763	18.4332	25.9669	28.4287	26.4259	1.2943	0.0193066
Mrpl10	107732	4.73664	5.04461	4.96325	5.97721	7.12769	5.971	1.29376	0.0217462
Gpsm2	76123	0.0925672	0.105679	0.100212	0.124691	0.125309	0.136123	1.29372	0.00533095
Pnpo	103711	2.12926	2.37862	2.14725	2.98038	3.11017	2.51737	1.29343	0.0298222
Mrps2	118451	0.894702	1.00074	0.91029	1.28371	1.29858	1.04618	1.29324	0.0358897
Brms1l	52592	2.24439	1.69724	2.11183	2.69805	2.45085	2.67755	1.29289	0.0319046
Copa	12847	8.01946	8.19958	9.70311	11.2982	10.5054	11.7077	1.29277	0.0167678
Nt5c3l	68106	1.52932	1.81361	1.81397	2.03921	2.34721	2.27972	1.29267	0.0194641
Amacr	17117	3.05304	3.31198	3.16001	4.11933	4.45087	3.74191	1.29261	0.0130665
Cetn2	26370	5.66802	6.35639	5.67711	7.14953	7.1367	8.58733	1.29218	0.0317758
Cdk8	264064	0.663219	0.571224	0.674098	0.781186	0.828725	0.856055	1.29207	0.00910424
Cinp	67236	2.46395	2.43576	2.48399	2.99302	3.2932	3.24692	1.29111	0.00161316
4933434E20Rik	99650	6.14301	6.71053	6.5439	7.73019	9.5952	7.71449	1.29089	0.0437358
Clns1a	12729	2.09377	2.76163	2.5308	3.03789	3.4206	3.07347	1.29051	0.0362395
Tmem161a	234371	3.2413	2.83962	2.68064	3.63756	4.018	3.64313	1.28957	0.0155207
Gm11453	241765	114.784	103.792	86.2347	122.052	132.647	138.338	1.28945	0.0373663
Rala	56044	5.49869	5.71659	4.83539	6.67689	6.92783	7.08784	1.2892	0.00599678
Gm2546	100040001	108.078	106.123	80.3808	133.152	123.291	123.321	1.28916	0.0404939
Tfdp1	21781	1.3417	1.00042	1.02758	1.45082	1.50312	1.39005	1.28913	0.0467876
Chn1	108699	0.65171	0.84869	0.694485	0.930545	0.89937	0.999449	1.28907	0.0338738
Jup	16480	0.906047	0.969829	0.92177	1.26084	1.31701	1.02814	1.28894	0.0408248
1700028B04Rik	70001	111.978	128.903	101.971	153.832	130.428	157.608	1.2888	0.0463576
Idh3b	170718	126.555	114.008	93.4531	138.93	143.407	147.943	1.2882	0.0325556
Snrpa	53607	2.86103	3.40024	3.72399	4.28142	4.49317	4.0884	1.2882	0.0258967
Eif3k	73830	28.4598	32.4015	26.6784	33.5136	39.1527	40.099	1.28816	0.0342154
Acot8	170789	0.742162	0.667651	0.757567	0.846607	0.988541	0.956639	1.28809	0.0152611
Gm8481	667147	47.8599	53.0268	47.4051	56.3837	64.9452	69.6647	1.28796	0.0293236
Atp6ap1	54411	5.77618	5.21256	5.05623	6.68248	7.76163	6.21837	1.28779	0.0384994
Nsun4	72181	1.3059	1.39015	1.25256	1.76718	1.67054	1.64645	1.28759	0.00225021
Slc35c2	228875	1.0594	1.07334	1.14841	1.241	1.52515	1.45674	1.28701	0.0251485
LOC100045932	100045932	158.265	140.479	124.164	178.127	188.933	177.092	1.28669	0.0186055
Clip4	78785	3.62162	4.06561	3.67555	5.1062	4.72029	4.79202	1.28653	0.00407883
Gm7170	635956	19.925	23.3126	23.6656	26.5533	28.7081	30.8052	1.28643	0.0202486
Tm6sf1	107769	0.509127	0.40207	0.452062	0.526959	0.605048	0.621687	1.2864	0.0376669
Eya2	14049	0.617069	0.710658	0.587183	0.766631	0.840882	0.855705	1.28634	0.0168383
Wasf2	242687	0.89693	0.719431	0.77615	0.936206	1.02501	1.11635	1.28634	0.0364008
Gm13770	619941	1.18426	1.57517	1.37788	1.7079	1.76197	1.85208	1.28633	0.0305308
Gm13204	100043151	88.4663	85.0806	78.3898	98.9816	114.296	110.733	1.28608	0.011933
Bbs2	67378	0.894407	0.858566	0.944459	1.09645	1.30437	1.06779	1.28589	0.0307705
Gm6322	622432	120.297	103.888	97.3715	132.919	148.372	132.179	1.28584	0.0237472
Mrpl12	56282	28.1772	30.6476	24.2219	34.4222	36.9546	35.4075	1.28583	0.017045
Clp1	98985	0.910767	0.811519	0.981414	1.09135	1.1932	1.19177	1.28577	0.0125119
Zfand2b	68818	1.42269	1.41309	1.35387	1.60722	1.91199	1.86734	1.28568	0.0149174
Snx6	72183	2.6585	2.7226	3.07459	3.45106	3.39628	4.02083	1.28531	0.0277836
LOC100047006	100047006	41.6226	47.282	40.8661	50.2878	57.9822	58.5194	1.28526	0.020973
Cdk19	78334	0.684653	0.546057	0.768394	0.888581	0.851827	0.828907	1.28523	0.0472588
Iqcc	230767	0.660373	0.703958	0.613617	0.858201	0.848158	0.83548	1.28509	0.00220685
Rnh1	107702	5.85735	6.68428	5.50919	7.90225	8.32064	6.96837	1.28478	0.0319386
2900092E17Rik	67278	2.22746	1.71129	2.08609	2.58895	2.51408	2.63468	1.2843	0.0224656
Ift20	55978	5.06034	5.60393	5.47487	6.50196	6.70655	7.50836	1.28364	0.0118464
Psip1	101739	0.374315	0.47889	0.486931	0.608936	0.577914	0.533122	1.28343	0.0405666
Chst7	60322	0.366068	0.413701	0.393412	0.507153	0.451559	0.546623	1.28312	0.0229479
B230118H07Rik	68170	27.6928	34.8001	29.8946	38.1089	36.6208	43.8007	1.28297	0.0453255
Evc	59056	0.546239	0.518367	0.65176	0.667896	0.758762	0.774599	1.28251	0.0369637
Thap11	59016	3.28322	3.56625	3.05288	4.58455	4.08972	4.0247	1.28242	0.015627
Syngr1	20972	12.0089	14.6481	15.6706	18.3817	17.9132	17.9816	1.28229	0.0223786
Ube2w	66799	1.64449	1.40541	1.4467	1.93748	1.8506	1.97761	1.28223	0.00692577
Gm6981	629557	96.3625	91.7447	76.7636	113.433	122.966	103.214	1.28219	0.0387014
Cox7a2l	20463	40.2298	40.7133	35.5639	46.9616	49.0816	53.3089	1.28192	0.011642
Bad	12015	4.8667	5.20098	4.55322	5.78117	6.00386	6.94291	1.2809	0.0271659
Cct4	12464	14.4148	11.9138	13.1667	17.0574	16.9408	16.5879	1.28081	0.00735744
Pld3	18807	0.98058	1.1305	1.21168	1.42506	1.51589	1.31435	1.28065	0.0253471
Rrm2b	382985	0.182426	0.165518	0.207177	0.24871	0.225734	0.236364	1.28046	0.0197589
Ykt6	56418	4.41108	4.34288	4.2869	5.46014	5.81187	5.42458	1.28033	0.000694231
Acadm	11364	139.043	122.545	117.494	166.12	154.139	165.083	1.28031	0.00937469
Gm2076	100039163	89.8529	83.3651	69.5582	98.6238	103.73	108.451	1.28021	0.0266839
Farsa	66590	1.4046	1.24943	1.16996	1.63111	1.75526	1.50839	1.28001	0.0227434
Mrpl10	107732	5.89815	6.77128	6.58869	8.13178	8.42704	8.09112	1.27998	0.00328251
Trim37	68729	0.226104	0.18291	0.245165	0.295407	0.257594	0.284264	1.27987	0.0473377
Preb	50907	2.01958	1.74084	2.04521	2.42475	2.62937	2.36978	1.27874	0.0126453
Gm9081	668275	232.556	212.65	180.69	262.03	272.387	265.873	1.27863	0.0195487
Dhrs3	20148	14.101	12.216	13.6053	15.7709	19.2372	16.0363	1.27859	0.041175
Ptp4a3	19245	60.8523	58.7538	57.2558	74.1241	85.4319	66.5691	1.27854	0.042256
Gm6443	623601	82.3106	80.845	67.1515	91.1291	105.174	98.0856	1.27824	0.0275724
Abhd11	68758	9.11088	9.15819	7.05656	10.5196	10.9611	10.8903	1.27819	0.0292257
Ica1	15893	0.536621	0.606716	0.658975	0.739444	0.836634	0.727567	1.27816	0.0278819
Tspan13	66109	3.96636	4.60654	4.26545	5.04904	5.59492	5.76433	1.27807	0.0138404
Zc3h14	75553	10.8175	9.62398	9.81821	12.6437	13.279	12.7471	1.27793	0.00259203
Gm7418	664947	71.157	78.9472	69.988	85.0345	95.2043	100.939	1.27755	0.0200019
Atp6v1e1	11973	13.9971	14.8208	13.498	16.6742	18.165	19.2002	1.27705	0.00918899
Cmpk1	66588	2.6192	3.1121	2.76525	3.46643	3.74085	3.6385	1.27649	0.00931843
Vegfb	22340	25.4667	22.1096	19.6665	27.5473	29.1099	29.1235	1.27569	0.0246849
Pja1	18744	2.21084	2.67754	2.61286	3.08735	3.43398	3.04107	1.27478	0.0230172
9130011J15Rik	66818	6.55678	6.88446	6.34901	7.91336	9.23355	8.08085	1.27476	0.0149891
Arap1	69710	1.18701	1.09547	1.25255	1.48896	1.43624	1.58078	1.27467	0.00646994
Mrpl30	107734	43.3305	50.2918	45.4793	54.5278	56.7379	66.0293	1.27457	0.035532
Hmox2	15369	13.1333	15.0134	14.5631	16.1831	18.6091	19.6169	1.27393	0.0287164
Efha1	68514	6.91922	7.82529	8.47661	9.62787	9.65202	10.2989	1.27379	0.01348
Cbr4	234309	6.51333	7.62397	6.23892	8.7533	8.3444	8.85698	1.27377	0.014621
Fxc1	14356	1.05452	0.920399	0.760976	1.12726	1.14056	1.21689	1.2737	0.0490879
2010001K21Rik	69829	0.213663	0.22948	0.24561	0.269437	0.300848	0.306926	1.27362	0.0133136
Lcmt1	30949	4.25683	5.20343	5.09279	5.60077	6.79691	6.13708	1.2736	0.0439575
Stoml2	66592	9.24454	11.1312	9.98394	11.411	13.671	13.5758	1.27333	0.0396484
Apoa2	11807	0.25678	0.265802	0.250073	0.286955	0.329328	0.367508	1.27326	0.0411942
Snrnp40	66585	0.821278	0.772545	0.825615	0.944814	1.16726	0.967677	1.27292	0.038821
Abcf2	27407	5.44262	4.1878	4.29095	6.09782	5.90992	5.71025	1.27272	0.0387234
Gm16517	110012	2.86885	2.90466	2.57055	3.28386	3.64529	3.68913	1.27255	0.0103826
Gm5678	435489	0.936491	1.00889	1.026	1.24494	1.29477	1.24063	1.27225	0.00114836
Hdac10	170787	0.851363	0.995414	1.03186	1.19783	1.35632	1.10809	1.27222	0.0456255
Aimp2	231872	6.69338	6.71187	6.48797	8.08221	8.64586	8.57476	1.27193	0.000704767
Ahcyl1	229709	2.8949	2.7594	2.52617	3.91414	3.41487	3.07501	1.27181	0.0497155
LOC634990	634990	126.698	155.877	115.452	166.088	170.043	170.079	1.2718	0.0409174
Cacng7	81904	0.230894	0.241408	0.229657	0.270341	0.297903	0.324452	1.27172	0.0166935
Ccdc28a	215814	1.76557	1.94732	1.83054	2.10627	2.45408	2.48744	1.27138	0.0195856
Paip2	67869	39.5218	44.391	41.8028	55.4358	51.4665	52.9258	1.27135	0.00336372
Gm11960	100041006	160.308	155.075	137.657	188.43	192.271	195.208	1.27121	0.00453465
Prmt3	71974	0.970271	0.750187	0.984187	1.07135	1.1963	1.16984	1.27096	0.0449619
Ccdc132	73288	1.2076	1.16118	1.28113	1.5718	1.54819	1.51762	1.27061	0.00100408
Banf1	23825	12.8172	15.9564	13.1562	16.8548	18.3666	18.0383	1.27021	0.0261215
Rgmb	68799	1.28114	1.14996	1.19444	1.46253	1.40343	1.73911	1.27017	0.0416558
Fcgrt	14132	7.95792	9.48037	9.53566	11.3104	12.2026	10.7416	1.26991	0.0222421
Fdxr	14149	0.675687	0.589149	0.623588	0.714874	0.869531	0.813721	1.26991	0.0304004
Nfkb1	18033	0.723345	0.657302	0.760383	0.977239	0.904345	0.836826	1.26967	0.0189514
Zfp637	232337	3.04263	3.21296	2.8672	3.67791	4.1154	3.78891	1.26959	0.00764836
Fam189b	68521	0.151461	0.159961	0.175291	0.207899	0.189316	0.220476	1.26911	0.0187556
Mrps12	24030	8.87812	9.44772	7.83571	10.4955	11.2808	11.421	1.26893	0.0132442
Dnajb1	81489	2.30276	1.77779	2.28329	2.5501	2.74015	2.78495	1.26892	0.0375875
Immt	76614	31.3215	30.5814	27.6815	37.9833	39.3453	36.3461	1.26891	0.00468507
Htra1	56213	6.00696	8.00825	8.27034	9.39048	9.3456	9.54206	1.2689	0.0495676
Hax1	23897	6.20746	5.77712	6.12406	6.96731	7.96628	8.04408	1.26888	0.0119113
Ncapd2	68298	0.392215	0.469769	0.418119	0.570286	0.562841	0.491112	1.26883	0.0279728
Phlpp2	244650	0.285641	0.242513	0.271885	0.301577	0.338577	0.374387	1.26811	0.0436659
Mov10l1	83456	6.08827	7.84091	7.2556	8.40603	9.16569	9.28635	1.2678	0.0317648
Pqbp1	54633	2.13466	2.25754	2.15274	2.45564	2.77308	3.06544	1.26726	0.0318039
Ing4	28019	2.32707	2.49881	2.55674	2.77478	3.16221	3.41782	1.26714	0.0299455
Gm11222	433716	2.02368	2.02245	2.06405	2.37332	2.94418	2.42385	1.26696	0.0410702
Tpcn1	252972	3.59937	3.09605	3.24075	3.78622	4.13195	4.6704	1.26694	0.0411056
Phpt1	75454	15.123	16.8546	16.475	19.3777	21.3588	20.6429	1.26679	0.00529379
Gm11953	100041720	51.0087	49.3643	39.819	57.9788	63.7856	55.8142	1.26668	0.0419203
Suclg1	56451	56.7326	59.597	58.081	76.1564	79.7222	65.0251	1.26657	0.0262499
Wdr83	67836	2.42396	2.64631	2.46849	2.99152	3.53894	3.01627	1.26635	0.0247909
Dnajc11	230935	0.506647	0.450095	0.482565	0.664204	0.575754	0.581949	1.26582	0.0178606
Mrpl36	94066	5.91653	7.49187	8.08767	8.74501	9.27562	9.18793	1.26575	0.0464028
Adrb2	11555	0.271707	0.248215	0.275201	0.290085	0.347311	0.368895	1.26558	0.0480064
Map2k2	26396	9.26623	8.19472	7.17093	9.81017	10.7122	10.6512	1.26558	0.0314252
Gm9007	668153	25.8775	24.8222	30.7674	31.9623	33.787	37.3403	1.26541	0.0407129
Filip1	70598	1.88888	1.61272	1.85373	2.48195	2.27902	2.01499	1.26527	0.0420635
Actr1b	226977	0.986345	0.93755	0.906677	1.17124	1.33646	1.07279	1.26494	0.0358276
Psma4	26441	14.1668	14.6826	12.8937	16.1081	17.5354	19.1416	1.26452	0.0229337
Gm8520	667216	148.915	150.868	138.631	168.192	183.73	202.388	1.26435	0.021801
Hnrnpc	15381	11.0322	10.0059	9.19065	13.4728	11.8987	12.8412	1.26412	0.0192636
Txnrd2	26462	3.11289	3.03323	2.98561	3.87349	3.9732	3.69454	1.26386	0.000855997
Trnau1ap	71787	3.8786	4.2272	3.73646	4.40103	5.09141	5.47308	1.26374	0.0395723
Arf4	11843	9.56195	11.1351	11.1447	13.885	12.0926	14.2581	1.26361	0.0302257
Exoc7	53413	2.54954	2.78545	2.96541	3.22569	3.82943	3.43204	1.26345	0.0272085
2810407C02Rik	69227	10.9049	12.4749	11.6001	15.5	13.4211	15.273	1.26342	0.0184616
Vars2	68915	0.474163	0.519806	0.554679	0.64626	0.682893	0.626332	1.2627	0.0090232
Gm8250	666712	48.8617	53.1553	47.9945	57.027	64.9778	67.3056	1.26197	0.0200144
Prpf3	70767	3.47601	2.91776	2.68925	3.68752	3.63903	4.13138	1.26147	0.0481258
Fam126a	84652	1.34481	1.52512	1.7039	2.01615	1.78448	1.9685	1.26133	0.0336544
Tmed1	17083	6.27425	6.48223	5.33435	7.11566	7.5372	8.16519	1.2613	0.0278495
Wfikkn2	278507	0.292705	0.244091	0.236745	0.321278	0.324307	0.329716	1.26083	0.0192156
Zfp46	22704	2.34401	1.89284	2.14599	2.84684	2.64391	2.55678	1.26081	0.0237953
Nkiras2	71966	1.07725	1.11666	1.10102	1.39688	1.48136	1.27572	1.26071	0.00922428
Scrn1	69938	0.291931	0.276422	0.303571	0.347749	0.361282	0.390133	1.26062	0.00684049
Gm5257	383531	25.9321	28.7054	26.2064	31.392	34.54	35.9102	1.25974	0.011983
Gcsh	68133	12.9383	14.2457	12.7302	16.6933	17.5856	15.9861	1.25933	0.00648619
Pik3c3	225326	1.26422	1.23639	1.29169	1.45953	1.80935	1.50639	1.2592	0.0416611
Nolc1	70769	1.63759	1.83143	1.68215	1.94378	2.3431	2.19741	1.2588	0.027192
Gm4786	213781	112.358	125.084	110.968	130.888	147.375	160.22	1.25852	0.0353146
Tusc2	80385	2.17568	2.41988	2.19558	2.58208	2.76668	3.19574	1.25818	0.0418447
Myst3	244349	2.12886	1.78176	2.26751	2.69048	2.34687	2.73417	1.25791	0.0485927
Surf1	20930	7.22139	7.21417	6.25981	7.94162	9.24961	8.84016	1.25784	0.0238212
Ppp1ca	19045	35.1376	39.1774	40.4549	43.8702	49.2355	51.2454	1.25774	0.0223286
Prdx2	21672	32.3958	33.3256	33.5359	40.8318	41.7401	42.2662	1.25772	9.82293e-05
Nav3	260315	0.0902245	0.0900739	0.0914579	0.110326	0.119291	0.112079	1.25736	0.00110357
Sirt4	75387	0.700082	0.755652	0.721788	0.910965	0.915293	0.910521	1.25683	0.000328804
Pgk1-rs7	668435	27.2852	28.233	23.8338	33.1818	34.9992	31.504	1.25624	0.0155197
Aarsd1	69684	4.53164	4.70069	4.72725	5.25992	6.38152	5.89073	1.25592	0.0226591
Suds3	71954	4.99226	4.54001	4.85528	5.68927	5.88281	6.49722	1.2559	0.0115496
Psmb5	19173	32.7639	35.7354	32.9497	40.0022	42.4739	44.9333	1.2559	0.00729057
Serp1	28146	2.63667	2.0988	2.19148	2.95623	3.03502	2.70784	1.25583	0.03768
Psenen	66340	18.1831	20.9576	18.1188	22.4638	24.014	25.404	1.25537	0.0181882
Wdfy3	72145	0.649352	0.55571	0.621412	0.805718	0.747851	0.73927	1.25534	0.0110165
Rasl10b	276952	1.50586	1.39925	1.35005	1.71774	1.78625	1.83411	1.2545	0.00319328
Cct7	12468	24.5739	22.1747	23.7982	27.3512	30.2854	30.8471	1.25425	0.00987751
Hmbs	15288	2.10116	2.13084	2.03261	2.51911	2.92771	2.40935	1.25405	0.0297069
Pih1d1	68845	2.97457	3.15642	2.98356	3.57075	3.78988	4.06786	1.25387	0.00771125
Srprb	20818	1.05092	1.04256	1.12675	1.37748	1.3844	1.27542	1.25373	0.00353612
Gm4929	238091	62.1665	54.6801	49.5979	66.4389	73.2599	68.9215	1.25339	0.0277784
Pdss2	71365	1.50889	1.19053	1.26737	1.62796	1.72456	1.61746	1.2529	0.0303522
Tomm40l	641376	1.0312	1.2376	1.31224	1.56084	1.53039	1.39403	1.2525	0.0376154
Ilk	16202	8.39516	10.4145	10.4103	11.2262	12.2149	13.1537	1.25239	0.0479972
2210013O21Rik	70123	4.73822	4.78359	4.02686	5.71296	5.51574	5.73362	1.25195	0.0110928
Sigmar1	18391	1.76108	1.79516	2.00487	2.25319	2.39347	2.31419	1.2517	0.00568237
Smu1	74255	3.38674	3.75293	3.36135	4.15089	4.4136	4.57852	1.25159	0.0076992
Tfam	21780	4.36301	4.42035	4.93184	5.72365	5.88638	5.55133	1.25126	0.00498649
Bicd2	76895	5.38707	4.95478	4.75771	6.90826	5.94221	6.03966	1.25104	0.0244459
Pcmt1	18537	8.64599	10.0859	8.61089	11.2152	11.9608	11.0274	1.25091	0.0153577
Atf2	11909	0.80949	0.662068	0.801162	0.927562	1.02876	0.886624	1.2509	0.0407696
Nog	18121	0.03	0.03	0.03	0.0389146	0.0383345	0.0352909	1.25044	0.0026024
Numb	18222	0.56394	0.457758	0.466644	0.568683	0.630945	0.661424	1.25042	0.0464389
Ptcd2	68927	3.86781	4.31772	4.56351	5.29554	5.54517	5.09543	1.24999	0.0117315
2210018M11Rik	233545	3.18344	3.18908	3.28539	4.26018	3.89712	3.9134	1.24983	0.00282131
Ptges2	96979	7.40505	6.6519	5.85291	8.78328	8.52259	7.57702	1.24978	0.0457636
Vdac3	22335	28.2061	33.721	29.022	40.8685	38.3814	34.3836	1.24942	0.0415119
Rrp1	18114	4.51929	4.9059	4.74334	5.43062	6.39982	5.86711	1.24907	0.0175794
Pex11b	18632	3.13789	3.70354	3.29837	3.76783	4.56223	4.32735	1.24829	0.0441954
Mybpc3	17868	127.039	136.004	121.465	154.451	152.777	172.557	1.24779	0.0140452
Decr1	67460	138.301	150.388	133.648	173.751	174.351	178.716	1.24739	0.00263893
Atg12	67526	1.13416	1.07729	1.01955	1.24593	1.39329	1.39065	1.24725	0.0106268
H2afy	26914	1.53819	1.35229	1.2653	1.80682	1.70936	1.66612	1.24701	0.0194917
Diablo	66593	5.71178	4.99748	5.06255	6.02451	7.33005	6.31005	1.24682	0.0469514
Nat15	74763	2.3325	2.33467	2.53799	3.09104	2.95677	2.93564	1.24681	0.00210145
Svip	75744	3.05517	3.53633	3.85975	4.73317	4.18332	4.11397	1.24678	0.0478681
LOC634088	634088	99.5906	93.7806	80.0783	110.571	114.819	115.542	1.24678	0.0198398
Gltscr2	68077	8.34027	7.72312	7.21339	9.08102	10.3265	9.6043	1.24638	0.01709
Jak2	16452	1.46955	1.45366	1.73165	2.02777	1.81785	1.95451	1.24604	0.0249308
Npc1	18145	1.02581	0.950395	1.05066	1.30089	1.34955	1.12014	1.2457	0.0310531
Park7	57320	43.9479	46.3368	39.3106	50.3563	54.8748	56.1978	1.24564	0.0174584
A130022J15Rik	101351	0.475776	0.484143	0.451084	0.597005	0.63081	0.52963	1.24553	0.0211396
Cog6	67542	4.3231	4.27361	4.34637	5.69016	5.63902	4.79051	1.24543	0.022361
Calu	12321	14.8531	15.5818	17.8668	20.8788	18.9597	20.2806	1.24466	0.0211973
Nme5	75533	1.26099	1.34308	1.30524	1.57829	1.68123	1.6054	1.24445	0.00120921
Trappc5	66682	1.20268	1.06935	1.08321	1.39875	1.41807	1.35847	1.24441	0.00396459
Ptpro	19277	0.650147	0.731865	0.752543	0.98142	0.880121	0.794421	1.24427	0.0496273
Ccdc77	67200	0.358239	0.334363	0.352529	0.434505	0.448145	0.416983	1.24351	0.00182338
Hat1	107435	1.31905	1.59416	1.38694	1.77562	1.75092	1.82021	1.24338	0.0149124
Gm5509	433204	0.541712	0.493643	0.472586	0.586059	0.66446	0.623925	1.24305	0.0160747
Ldhb	16832	139.36	146.859	133.16	172.073	179.5	169.707	1.24298	0.00234144
Lysmd1	217779	0.58544	0.592836	0.721634	0.772622	0.838779	0.749971	1.24289	0.0407515
Glrx5	73046	16.2315	19.0267	15.6978	21.343	21.581	20.4026	1.24277	0.0195673
Mrps31	57312	8.76488	10.2095	8.78219	11.1121	12.068	11.3127	1.24269	0.0160198
Galnt1	14423	2.39265	2.18534	2.61417	3.11507	2.94119	2.88077	1.24261	0.0150247
Higd2a	67044	19.7022	20.9897	17.3839	24.0501	23.5085	24.5752	1.24206	0.0130131
Scaper	244891	1.27271	1.22522	1.27943	1.38744	1.65225	1.65164	1.24196	0.0274688
Ywhaz	22631	3.87273	3.68454	3.84456	4.79277	5.2216	4.14311	1.24169	0.0450089
Gm4929	238091	79.4603	77.4257	61.9449	85.9704	95.7065	90.0005	1.24149	0.0470301
Gm14263	668955	112.071	115.75	92.5106	123.14	133.953	140.551	1.24135	0.0431422
Myo9b	17925	0.642473	0.63229	0.641271	0.775542	0.758445	0.844162	1.24118	0.00429294
Gstp2	14869	29.5225	27.9983	26.1681	31.5379	33.4457	38.8742	1.241	0.0488685
Fam175b	109359	1.13712	1.18083	1.2766	1.59562	1.51298	1.35204	1.24095	0.024937
Snap29	67474	1.33569	1.36	1.29279	1.57433	1.65772	1.71685	1.2408	0.00219859
Mrps22	64655	1.75109	2.12569	1.94495	2.34278	2.47008	2.40832	1.24038	0.0150549
Ppid	67738	4.60464	5.06198	4.80462	5.90154	5.40472	6.64343	1.24037	0.0390257
Cecr2	330409	0.101457	0.0934032	0.113254	0.132936	0.119255	0.129957	1.24028	0.0255052
Pebp1	23980	22.4584	21.7272	20.0428	26.7957	26.7325	26.0847	1.23953	0.00239868
Taldo1	21351	11.0434	12.8904	12.1677	15.323	15.6455	13.7438	1.23852	0.0226632
Metap2	56307	4.66198	5.54421	5.05427	6.29462	6.09062	6.51073	1.23823	0.0127578
Tmed9	67511	0.517344	0.572656	0.571663	0.598819	0.738113	0.72018	1.23798	0.0498099
Grpel1	17713	20.5898	22.5623	19.9019	24.3093	26.9161	26.8137	1.23766	0.0128502
Nat14	269854	0.387158	0.364872	0.364433	0.440911	0.421118	0.519609	1.23751	0.0463364
Ube2a	22209	1.95218	1.9949	2.31961	2.78421	2.49994	2.4703	1.2374	0.0317661
1700027J07Rik	69443	0.0332119	0.03	0.0311621	0.0404259	0.0370073	0.0393224	1.23716	0.00562563
Nrbp1	192292	5.95631	5.67946	5.18633	6.22937	7.21975	7.35771	1.23687	0.0342748
Dpagt1	13478	3.36029	3.14249	3.46105	3.81967	4.27691	4.22658	1.23679	0.0103673
Gm7241	638532	0.345339	0.364583	0.339445	0.395305	0.438191	0.463554	1.23603	0.0179398
2310001A20Rik	71881	2.885	3.57773	3.403	3.8802	4.2771	4.03645	1.23597	0.0310188
Fgfr1op	75296	0.966822	0.884261	0.964722	1.27628	1.1761	1.02787	1.23597	0.045353
Snrpb	20638	16.832	18.7164	14.4654	20.5949	21.0484	20.1703	1.23593	0.0351034
Slmo2	66390	6.16908	6.54918	5.8247	7.62906	7.35471	7.9279	1.2356	0.00547524
Gm8445	667077	8.71843	7.88304	7.70893	10.0593	10.5747	9.40371	1.23559	0.0142909
Psmb7	19177	29.3675	32.8761	27.1613	35.8723	36.9717	37.6152	1.2355	0.015689
Zfyve19	72008	0.786981	0.858614	0.826375	0.918604	1.10464	1.03057	1.23538	0.0285852
Pin1	23988	5.28455	5.02495	4.96759	5.83174	6.5682	6.47081	1.23523	0.00878873
1700080G18Rik	73533	0.425391	0.451404	0.354023	0.508319	0.493934	0.517839	1.23503	0.032222
Rps19bp1	66538	2.3996	2.27674	2.16311	2.64682	2.759	3.0407	1.23497	0.0168145
Fam114a2	67726	6.1505	6.94032	6.3155	7.35207	8.11885	8.49125	1.23476	0.0212093
Abl1	11350	2.58457	2.94972	2.93416	3.66374	3.17711	3.61102	1.23421	0.0274688
Eef1g	67160	20.5535	16.912	19.6575	23.6722	24.9859	21.8275	1.23393	0.0355562
Scara5	71145	0.181594	0.176506	0.150318	0.19689	0.209522	0.220908	1.23387	0.0292127
Gapdh	14433	296.207	280.939	236.776	318.242	335.91	350.034	1.23376	0.0340938
Rhot2	214952	7.40395	7.2585	8.02232	9.46249	9.94325	8.56722	1.23312	0.0194252
Hk1	15275	2.75138	2.44947	2.89892	3.16196	3.38272	3.44163	1.23291	0.0161581
Rnaseh2a	69724	2.20738	2.36474	2.3721	2.66244	3.11382	2.78427	1.23276	0.0206131
Nfib	18028	2.37902	2.37932	2.48397	3.01266	3.08249	2.83058	1.23244	0.00247609
Vdac1	22333	118.139	125.822	119.358	158.526	144.714	144.521	1.23241	0.00569632
Nfic	18029	7.27931	8.39703	7.80747	9.28778	9.37813	10.2704	1.23218	0.0156232
Bckdk	12041	8.69252	7.88956	8.27244	9.86679	11.047	9.71084	1.23216	0.0161863
Pisd	320951	2.43346	2.4256	2.81604	2.95197	3.32019	3.18161	1.23175	0.0241258
Mtrf1	211253	1.97717	2.50216	2.34025	2.71616	2.94933	2.72743	1.23071	0.0385812
2310044H10Rik	69683	4.25735	3.82573	3.57706	4.94345	4.83531	4.57037	1.23061	0.0169731
Gm4941	239341	19.2677	17.2742	18.3312	20.3879	23.0941	24.0454	1.23061	0.0270763
Bak1	12018	1.36509	1.61373	1.56391	1.90829	1.72264	1.95714	1.23011	0.0287816
Enho	69638	1.58142	1.65072	1.72102	2.01034	1.97206	2.10989	1.22998	0.00273306
Mrpl46	67308	4.28217	5.42611	4.32994	5.88233	5.80084	5.58276	1.22992	0.0487787
Mbd3	17192	3.17339	3.00333	2.43092	3.51262	3.41997	3.65377	1.22988	0.048267
LOC675184	675184	101.832	101.227	90.3785	110.957	125.907	123.989	1.22974	0.0199394
Smarce1	57376	2.36907	2.55981	2.60229	3.10349	2.95593	3.20194	1.22974	0.00469544
Ccdc41	77048	1.64976	1.63107	1.72969	2.14957	1.7973	2.21446	1.22968	0.0448995
Pln	18821	106.176	131.417	128.475	140.349	158.541	151.238	1.22963	0.0428013
Kif7	16576	0.136277	0.158816	0.147597	0.172055	0.190474	0.181757	1.22949	0.0157405
Slc25a26	67582	1.29311	1.52968	1.54167	1.86129	1.62292	1.88187	1.22949	0.0450879
Qars	97541	7.69648	7.57151	7.43224	9.17317	10.2672	8.44791	1.22855	0.0317648
BC029722	613262	5.77344	5.1777	4.99695	6.86807	6.65373	6.06912	1.22842	0.022202
Snrk	20623	10.4989	9.1824	9.81008	11.991	13.1471	11.0823	1.22817	0.0339457
Gm6172	620692	0.697929	0.692654	0.647948	0.746211	0.844956	0.912153	1.228	0.0378841
Nod1	107607	2.82448	2.59818	2.78729	3.47795	3.2188	3.38347	1.22781	0.00378163
Tmem126a	66271	10.0668	12.1282	10.0402	13.055	12.482	14.0347	1.22759	0.0416676
H2afz	51788	5.02205	5.61814	4.89558	6.22908	6.00304	6.83772	1.22748	0.0243654
Gm15653	627733	59.1472	60.1848	53.208	68.0597	71.3461	72.3379	1.22721	0.00666365
Itgb1bp1	16413	4.88482	4.78037	4.19128	5.42948	5.36707	6.20635	1.22707	0.0386223
Prdx5	54683	65.0371	66.9879	54.5155	74.4078	74.6322	79.7089	1.22627	0.0294821
Msl3	17692	4.697	4.60469	4.63426	5.58213	6.0135	5.48674	1.22578	0.00309126
Rps2	16898	119.075	121.413	106.194	131.009	149.901	144.04	1.22576	0.0234839
Timm8a1	30058	1.13709	1.26438	1.00356	1.34415	1.39933	1.4289	1.22536	0.0320959
Tpm1	22003	4.1642	4.75608	4.3354	4.91602	5.56666	5.75815	1.2252	0.0324787
Ywhab	54401	4.15932	4.38477	5.2377	5.70358	5.68282	5.49838	1.22515	0.0366
BC024814	239706	3.01995	3.80124	3.44324	4.19612	4.20873	4.17059	1.22515	0.0270931
2700089E24Rik	381820	2.21363	2.3622	2.40535	3.05804	2.53064	2.96411	1.22512	0.038512
Tymp	72962	3.32395	4.09957	3.77213	4.30072	4.91483	4.50012	1.22509	0.0436224
Sparcl1	13602	29.6258	35.2743	36.6184	41.6972	38.4548	44.1927	1.22485	0.048475
Fech	14151	16.3328	13.4454	13.7169	18.8532	16.9409	17.4767	1.22475	0.0395433
Mapk3	26417	4.39952	4.14647	4.27091	4.81395	5.21588	5.66221	1.22432	0.0199662
Htr7	15566	0.0983762	0.088443	0.088095	0.11158	0.106041	0.118908	1.22413	0.0150044
Actl6a	56456	2.19751	2.64505	2.56813	3.07162	2.8907	3.10791	1.22394	0.0227399
Tspan17	74257	1.68156	1.95899	1.92501	2.11345	2.25961	2.43591	1.22341	0.0315523
Defa23	497114	0.03	0.03	0.03	0.0389049	0.0319188	0.0392581	1.22313	0.0487564
Nrd1	230598	0.22776	0.215908	0.222648	0.277048	0.258715	0.279118	1.22297	0.00251076
Gm14288	13999	27.661	31.3191	29.2427	34.8496	37.2684	35.7621	1.22282	0.00674791
Rnf167	70510	3.42951	2.98373	3.47308	3.9859	4.37403	3.72673	1.22256	0.0399971
Cinp	67236	1.12756	1.14871	1.13019	1.29871	1.48939	1.37534	1.22222	0.0106381
LOC634083	634083	42.3702	45.6554	37.6116	48.8721	51.2949	53.346	1.22188	0.0253219
Pbx2	18515	1.36216	1.49278	1.57862	1.66288	1.89359	1.86064	1.22184	0.0266003
Yaf2	67057	4.59094	4.88402	4.54507	5.61949	5.57194	5.934	1.2215	0.00264395
Hscb	100900	2.96328	3.1066	3.21745	3.6868	3.99714	3.65829	1.22126	0.0064066
LOC639606	639606	153.165	149.133	133.716	160.597	181.706	190	1.22084	0.038534
Lepre1	56401	0.355443	0.356095	0.314118	0.414816	0.439273	0.398009	1.22078	0.0146612
Dcaf7	71833	0.208646	0.186078	0.226931	0.25682	0.247797	0.254021	1.22035	0.0196068
Arpc4	68089	2.64317	3.05327	2.88163	3.32105	3.58482	3.55726	1.21975	0.0124375
Rbm18	67889	3.59338	3.78533	3.88135	4.95382	4.41245	4.36495	1.21946	0.0164037
Gm8174	666579	146.325	136.932	116.639	167.434	160.157	160.061	1.21945	0.0323861
Gm12344	628108	18.3546	22.4212	19.7178	23.3114	24.4445	25.9856	1.219	0.036204
Alg14	66789	0.730424	0.729911	0.734031	0.867361	0.877305	0.930169	1.21896	0.00120575
Chmp4c	66371	0.328389	0.376567	0.382908	0.409876	0.439338	0.476753	1.21887	0.0374967
Kbtbd12	74589	0.546399	0.579278	0.477556	0.635214	0.706603	0.612235	1.21882	0.0472635
Aen	68048	4.21795	5.06229	4.8199	5.81295	5.84352	5.52031	1.2182	0.0194383
Ddx49	234374	1.70558	1.7997	1.71545	1.89444	2.25555	2.20765	1.21777	0.0317902
[truncated: 245 more rows]
