# Supplementary material
Source: Frontiers journal article supplement (https://www.frontiersin.org/articles/17261)
Supplement: Data_Sheet_7.XLS [file Data_Sheet_7.XLS]

## Sheet: Sb2
	Down-regulated genes in 4-day hyperglycemic MBL null mice
Gene Group 1	Enrichment Score: 13.721000410108367
ENTREZ_GENE_ID	Gene Name
664812, 270148, 209589, 621699	similar to 40S ribosomal protein S7 (S8); predicted gene 6252; predicted gene 5055; predicted gene 4761; ribosomal protein S7; predicted gene 7351; predicted gene 6472
241621, 237361, 666648	predicted gene 14439; predicted gene 8213; predicted gene 13981; predicted gene 8451; predicted gene 6378; predicted gene 8667; predicted gene 4923; predicted gene 5908; ribosomal protein L27a; predicted gene 14044; predicted gene 7536; predicted gene 14407
20088, 383815, 664841, 668724, 677113, 225058	predicted gene 11878; predicted gene 4832; predicted gene 8942; predicted gene 6030; predicted gene 9320; predicted gene 5271; predicted gene 7363; ribosomal protein S24; similar to ribosomal protein S24; predicted gene 8292; predicted gene 6948
66483	predicted gene 8697; similar to large subunit ribosomal protein L36a; predicted gene 11970; predicted gene 10077; similar to ribosomal protein L36a; predicted gene 2718; predicted gene 10316; predicted gene 8001; predicted gene 6525; predicted gene 9409; ribosomal protein L36A; ribosomal protein L36A-like
623568	predicted gene 4997; predicted gene 6440; ribosomal protein S20; predicted gene 4332; similar to 40S ribosomal protein S20; similar to ribosomal protein S20
619975	predicted gene 3174; predicted gene 8112; predicted gene 8158; ribosomal protein L23a; predicted gene 5384; predicted gene 8264; predicted gene 6233; similar to 60S ribosomal protein L23a; predicted gene 7413; predicted gene 5351; predicted gene 6177; similar to ribosomal protein L23a; predicted gene 7065; predicted gene 7755; predicted gene 10335; predicted gene 8137; predicted gene 3362; predic…
625219	predicted gene 14460; predicted gene 13891; predicted gene 2387; ribosomal protein 10; predicted gene 7476; predicted gene 4167; predicted gene 5621; predicted gene 3379; similar to QM protein; predicted gene 11450; predicted gene 6564; predicted gene 3405; predicted gene 10041; predicted gene 4892; ribosomal protein L10-like
100043503, 625281	predicted gene 4091; predicted gene 9703; predicted gene 12191; predicted gene 7429; similar to ribosomal protein L30; predicted gene 4483; ribosomal protein L30; predicted gene 2648; predicted gene 8808; predicted gene 6570; predicted gene 6109; ribosomal protein L30, pseudogene 2
667518, 676058	predicted gene 8680; predicted gene 9663; predicted gene 7434; predicted gene 6251; predicted gene 6520; ribosomal protein L32
432681	predicted gene 10191; predicted gene 7689; predicted gene 9401; similar to ribosomal protein L31; hypothetical protein LOC675768; predicted gene 13004; predicted gene 9228; predicted gene 10072; predicted gene 5437; predicted gene 9154; ribosomal protein L31; predicted gene 6670; predicted gene 8759
229746	predicted gene 4833; predicted gene 9616; predicted gene 13680; predicted gene 4859; predicted gene 8729; predicted gene 8231; ribosomal protein S4, X-linked
208522	predicted gene 4754; ribosomal protein L7; predicted gene 12174; LOC100049084; predicted gene 6543; predicted gene 7059; predicted gene 4734
546711	similar to 40S ribosomal protein S25; predicted gene 6988; predicted gene 10206; ribosomal protein S25; predicted gene 6029; predicted gene 4963; predicted gene 7926; predicted gene 2225
666545	predicted gene 14217; predicted gene 7424; predicted gene 8934; ribosomal protein L5; similar to ribosomal protein L5; similar to 60S ribosomal protein L5; predicted gene 15616; predicted gene 15500; predicted gene 7625
279067	predicted gene 11942; predicted gene 13777; predicted gene 10073; ribosomal protein, large, P1
624863, 633178	similar to 60S ribosomal protein L13a (Transplantation antigen P198) (Tum-P198 antigen); ribosomal protein L13A; similar to 60S ribosomal protein L13a; predicted gene 6533
20091, 668071	predicted gene 10119; predicted gene 13408; predicted gene 7600; ribosomal protein S3A; similar to 40S ribosomal protein S3a (V-fos transformation effector protein); predicted gene 9058; predicted gene 8960; predicted gene 5586
73486	RIKEN cDNA 1700084J12 gene
280047, 270106	similar to ribosomal protein L13; predicted gene 10071; predicted gene 9026; predicted gene 12918; predicted gene 7290; predicted gene 5075; predicted gene 15710; similar to 60S ribosomal protein L13; predicted gene 7159; ribosomal protein L13
100043299, 100048204	predicted gene 8624; predicted gene 9701; predicted gene 8467; predicted gene 15450; ribosomal protein S23; similar to yeast ribosomal protein S28 homologue; predicted gene 5148; similar to ribosomal protein S23; predicted gene 10054
67115	predicted gene 9811; ribosomal protein L14
383462, 628477	predicted gene 6807; predicted gene 6136; predicted gene 6883; predicted gene 5428; similar to ribosomal protein L6; predicted gene 5247; ribosomal protein L6
668300	predicted gene 9625; predicted gene 14165; similar to acidic ribosomal phosphoprotein P0; predicted gene 8730; predicted gene 9093; ribosomal protein, large, P0
636446, 432768, 667487, 433546	predicted gene 10117; similar to ribosomal protein L9; ribosomal protein L9; similar to 60S ribosomal protein L9; predicted gene 4600; predicted gene 6028; predicted gene 5451; predicted gene 14231; similar to Ribosomal protein L9; predicted gene 8662; predicted gene 10321; predicted gene 6450; predicted gene 8959
100040611	ribosomal protein L34; predicted gene 10154; similar to ribosomal protein L34; predicted gene 7800; predicted gene 4705
100039322	predicted gene 2157; similar to ribosomal protein L22 like 1; ribosomal protein L22 like 1
67891	predicted gene 5835; ribosomal protein L4
382766	predicted gene 13573; predicted gene 15451; ribosomal protein L10A; predicted gene 7695; similar to ribosomal protein L10a
627939, 100041000, 433387, 667919, 665588, 100043866, 675278, 666714, 432725, 545226, 637900	predicted gene 12618; predicted gene 8724; predicted gene 10155; predicted gene 3355; predicted gene 3713; predicted gene 3201; predicted gene 13641; similar to ribosomal protein L21; predicted gene 12411; predicted gene 5445; predicted gene 5495; predicted gene 13604; predicted gene 10045; predicted gene 14648; predicted gene 15150; predicted gene 8252; predicted gene 8157; predicted gene 8880; …
100042880, 319195	predicted gene 8081; similar to Ribosomal protein L17; similar to Rpl17 protein; predicted gene 10164; similar to 60S ribosomal protein L17 (L23) (Amino acid starvation-induced protein) (ASI); predicted gene 3800; predicted gene 10294; predicted gene 10223; predicted gene 7299; predicted gene 10362; predicted gene 8358; predicted gene 8371; ribosomal protein L17; similar to hCG24487; predicted ge…
628327	similar to 40S ribosomal protein S15 (RIG protein); predicted gene 6921; similar to insulinoma protein (rig); predicted gene 8460; predicted gene 7121; predicted gene 5781; predicted gene 5508; predicted gene 6867; ribosomal protein S15
328825, 67025	predicted gene 10288; predicted gene 7589; ribosomal protein L11; predicted gene 10036; predicted gene 7384; predicted gene 6745; predicted gene 5093
668406, 676774, 627835	predicted gene 16422; predicted gene 6646; ribosomal protein S12; predicted gene 12334; predicted gene 5642; predicted gene 14059; predicted gene 5462; predicted gene 7698; predicted gene 7586; similar to ribosomal protein S12; predicted gene 14958; predicted gene 15887; predicted gene 10063; predicted gene 7601; predicted gene 9153; predicted gene 7671; predicted gene 9122; similar to 40S riboso…
57808	predicted gene 10213; predicted gene 10214; predicted gene 10029; ribosomal protein L35A; predicted gene 3649; predicted gene 11810; predicted gene 10247; predicted gene 10237; predicted gene 10296; predicted gene 13911; predicted gene 15434; predicted gene 3167; predicted gene 12778; similar to ribosomal protein L35a
Gene Group 2	Enrichment Score: 4.313483050878518
ENTREZ_GENE_ID	Gene Name
52713	coiled-coil domain containing 59
75316	TATA box binding protein (Tbp)-associated factor, RNA polymerase I, D; predicted gene 13487
70461	CREB regulated transcription coactivator 3; similar to transducer of regulated CREB protein 3
235497	Leo1, Paf1/RNA polymerase II complex component, homolog (S. cerevisiae)
12607	CCAAT/enhancer binding protein zeta
67367	RIKEN cDNA 1810007M14 gene
71059	similar to hexamthylene bis-acetamide inducible 2; hexamthylene bis-acetamide inducible 2
Gene Group 3	Enrichment Score: 3.636042746464287
ENTREZ_GENE_ID	Gene Name
11834	aquarius
230257	ROD1 regulator of differentiation 1 (S. pombe)
108014	splicing factor, arginine/serine rich 9
68272	RNA binding motif protein 28
632248	predicted gene 7509; splicing factor, arginine/serine-rich 3 (SRp20); similar to MGC89287 protein; predicted gene 9761; predicted gene 7083
20641	small nuclear ribonucleoprotein D1; predicted gene 14277
381065, 667475	predicted gene 8655; predicted gene 5145; predicted gene 8587; small nuclear ribonucleoprotein polypeptide A; predicted gene 5161
624454, 625989	predicted gene 7498; hypothetical protein LOC635773; predicted gene 9242; predicted gene 6793; predicted gene 14730; predicted gene 7551; predicted gene 14398; predicted gene 6528; predicted gene 6641; hypothetical protein LOC630507; predicted gene 5550; predicted gene 11847; predicted gene 6506; predicted gene 6153; predicted gene 5469; predicted gene 8991; similar to heterogeneous nuclear ribon…
20462	transformer 2 beta homolog (Drosophila); predicted gene 6439
68981	small nuclear ribonucleoprotein polypeptide A'
72290	U7 snRNP-specific Sm-like protein LSM11
Gene Group 4	Enrichment Score: 3.4096282118004204
ENTREZ_GENE_ID	Gene Name
223499	WD repeats and SOF domain containing 1
27993	IMP4, U3 small nucleolar ribonucleoprotein, homolog (yeast)
66254	DIM1 dimethyladenosine transferase 1-like (S. cerevisiae)
66583	exosome component 1
18150	nucleoplasmin 3; nucleoplasmin 3, pseudogene 1
70285	brix domain containing 5
675063, 59050	predicted gene 15596; RIKEN cDNA 5730427N09 gene; similar to TGF beta-inducible nuclear protein 1 (L-name related LNR42); predicted gene 7966; predicted gene 5515; predicted gene 9722; predicted gene 6451; predicted gene 9634
Gene Group 5	Enrichment Score: 2.7078498839289096
ENTREZ_GENE_ID	Gene Name
105559	muscleblind-like 2
74213	RNA binding motif protein 26
546075	predicted gene 5909; zinc finger CCCH-type containing 15
70579	zinc finger CCCH type containing 11A
192196	predicted gene 11889; LUC7-like 2 (S. cerevisiae)
67302	zinc finger CCCH type containing 13
74154	unkempt-like (Drosophila); similar to zinc finger CCCH type containing 5
330474	zinc finger CCCH-type containing 4
78751	zinc finger CCCH type containing 6
66597	tripartite motif-containing 13; predicted gene 9359
319817	ring finger and CCCH-type zinc finger domains 2
Gene Group 6	Enrichment Score: 2.611157752492863
ENTREZ_GENE_ID	Gene Name
53622	keratin 85
19132	peripherin
16691	predicted gene 5604; keratin 8
223917	keratin 79
16666	keratin 16
223915	keratin 73
226180	internexin neuronal intermediate filament protein, alpha
Gene Group 7	Enrichment Score: 2.245467522001111
ENTREZ_GENE_ID	Gene Name
319163	histone cluster 1, H2aa
100044525, 620119, 620143, 238836	predicted gene 14383; predicted gene 3835; predicted gene 14384; predicted gene 12950; predicted gene, 670915; H3 histone, family 3A; predicted gene 12657; predicted gene 6132; predicted gene 10257; predicted gene 7227; H3 histone, family 3B; predicted gene 6128; similar to histone; predicted gene 1986; predicted gene 6186; hypothetical protein LOC676337; predicted gene 6421; predicted gene 2198;…
67334	RIKEN cDNA 1700054O13 gene
319148	histone cluster 2, H3b; histone cluster 1, H3f; histone cluster 1, H3e; histone cluster 2, H3c1; histone cluster 1, H3d; histone cluster 1, H3c; histone cluster 1, H3b; histone cluster 2, H3c2; histone cluster 2, H2aa1; histone cluster 2, H2aa2
26914	H2A histone family, member Y
Gene Group 8	Enrichment Score: 2.208755427594713
ENTREZ_GENE_ID	Gene Name
73710	tubulin, beta 2a, pseudogene 2; tubulin, beta 2B
18080	ninein
665829	tubulin, beta 2c, psuedogene 1; tubulin, beta 2C; tubulin, beta 2c, pseudogene 2
100045728, 636070	predicted gene 7172; similar to tubulin, alpha 1; tubulin, alpha 1A
22151	tubulin, beta 2A
Gene Group 9	Enrichment Score: 1.9704769631486478
ENTREZ_GENE_ID	Gene Name
108797	mex3 homolog B (C. elegans)
74154	unkempt-like (Drosophila); similar to zinc finger CCCH type containing 5
66597	tripartite motif-containing 13; predicted gene 9359
22644	ring finger protein 103
217333	tripartite motif-containing 47
319817	ring finger and CCCH-type zinc finger domains 2
330812	ring finger protein 150; similar to ring finger protein 150
Gene Group 10	Enrichment Score: 1.8066337136313666
ENTREZ_GENE_ID	Gene Name
21406	transcription factor 12
99730	predicted gene 9643; predicted gene 8393; predicted gene 11189; TAF13 RNA polymerase II, TATA box binding protein (TBP)-associated factor
21422	transcription factor CP2
66172	mediator of RNA polymerase II transcription, subunit 11 homolog (S. cerevisiae)
101206	transcriptional adaptor 3 (NGG1 homolog, yeast)-like; predicted gene 9109
28077	mediator of RNA polymerase II transcription, subunit 10 homolog (NUT2, S. cerevisiae)
70208	mediator complex subunit 23
Gene Group 11	Enrichment Score: 1.3974131764045865
ENTREZ_GENE_ID	Gene Name
230119	zinc finger and BTB domain containing 5; predicted gene 6766
193736	zinc finger and BTB domain containing 12
628709	predicted gene 10324
210105	zinc finger protein 719
243937	zinc finger protein 536
16969	zinc finger and BTB domain containing 7a
243373	expressed sequence AI854703
234358	cDNA sequence D10627
210104	cDNA sequence BC043301
50796	doublesex and mab-3 related transcription factor 1
67302	zinc finger CCCH type containing 13
68750	ras responsive element binding protein 1
69890	zinc finger protein 219
668501	zinc finger protein 507
56809	glucocorticoid modulatory element binding protein 1
105590	expressed sequence AU017455
69743	castor homolog 1, zinc finger (Drosophila); similar to castor homolog 1, zinc finger
93691	Kruppel-like factor 7 (ubiquitous)
228913	zinc finger protein 217
79233	zinc finger protein 319
70227	zinc finger protein 619
71834	zinc finger and BTB domain containing 43
100043034	hypothetical protein LOC100048814; predicted gene 13138; reduced expression 2; predicted gene 13164
74570	zinc finger with KRAB and SCAN domains 1
668620	RIKEN cDNA I1C0022H11 gene; similar to crooked legs CG14938-PB; predicted gene 9272
232879	zinc finger and BTB domain containing 45
77519	RIKEN cDNA 5730601F06 gene
54201	zinc finger protein 316
100041677	similar to novel KRAB box containing protein; predicted gene 13157; similar to crooked legs CG14938-PB
100043403	predicted gene 2007; predicted gene 4724; predicted gene 14410; predicted gene, OTTMUSG00000016609; RIKEN cDNA 0610010B08 gene; RIKEN cDNA 3100002L24 gene; predicted gene 14308; predicted gene 14326; predicted gene 14434; predicted gene, 100043387; predicted gene 4631; predicted gene 14430
234362	zinc finger protein 868
50794	Kruppel-like factor 13
229584	pogo transposable element with ZNF domain
23967	odd-skipped related 1 (Drosophila)
245174	predicted gene 4979; predicted gene 14139
22715	zinc finger protein 57
30944	zinc finger protein 354C
319615	RIKEN cDNA 6330416L07 gene; hypothetical protein LOC100044279
228829	PHD finger protein 20
22746	zinc finger protein 85, related sequence 1
69234	zinc finger protein 688
101197	expressed sequence AI894139
99377	sal-like 4 (Drosophila)
666581	predicted gene 13051; predicted gene 8935; predicted gene 13151
101604	RIKEN cDNA E430018J23 gene; RIKEN cDNA 9130019O22 gene
Gene Group 12	Enrichment Score: 1.2631780746483374
ENTREZ_GENE_ID	Gene Name
68278	DEAD (Asp-Glu-Ala-Asp) box polypeptide 39
104806	Fanconi anemia, complementation group M
666672	predicted gene 8228; DEAD (Asp-Glu-Ala-Asp) box polypeptide 50
75560	E1A binding protein p400
68142	INO80 homolog (S. cerevisiae); similar to yeast INO80-like protein
Gene Group 13	Enrichment Score: 1.1314334933318873
ENTREZ_GENE_ID	Gene Name
319481	WD repeat domain 59
99512	WD repeat domain 47
59043	WD repeat and SOCS box-containing 2
192652	WD repeat domain 81
101612	glutamate-rich WD repeat containing 1
319555	NACHT and WD repeat domain containing 1
106618	WD repeat domain 90
18786	phospholipase A2, activating protein
71735	leucine-rich repeats and WD repeat domain containing 1
Gene Group 14	Enrichment Score: 1.095830105991006
ENTREZ_GENE_ID	Gene Name
12661	cell adhesion molecule with homology to L1CAM
117606	biregional cell adhesion molecule-related/down-regulated by oncogenes (Cdon) binding protein
330222	sidekick homolog 1 (chicken)
237979	sidekick homolog 2 (chicken)
13176	deleted in colorectal carcinoma
17967	neural cell adhesion molecule 1
12483	CD22 antigen; hypothetical protein LOC100047973
Gene Group 15	Enrichment Score: 0.7920949885428852
ENTREZ_GENE_ID	Gene Name
333050	kinase suppressor of ras 2
18712	proviral integration site 1
108737	oxidative-stress responsive 1
214897	casein kinase 1, gamma 1
320129	adrenergic receptor kinase, beta 2
56274	serine/threonine kinase 3 (Ste20, yeast homolog)
20817	serine/arginine-rich protein specific kinase 2
23954	NIMA (never in mitosis gene a)-related expressed kinase 3
381979	BR serine/threonine kinase 1
332110	mitogen-activated protein kinase 15
14158	fer (fms/fps related) protein kinase, testis specific 2
12323	calcium/calmodulin-dependent protein kinase II, beta
69635	death associated protein kinase 1
26398	mitogen-activated protein kinase kinase 4
20874	STE20-like kinase (yeast)
18607	3-phosphoinositide dependent protein kinase-1
329421	myosin IIIB
53608	mitogen-activated protein kinase kinase kinase 6
50523	large tumor suppressor 2
232341	WNK lysine deficient protein kinase 1
Gene Group 16	Enrichment Score: 0.6769989535447134
ENTREZ_GENE_ID	Gene Name
19744	Ras homolog enriched in brain; similar to RAS-homolog enriched in brain
67295	similar to RAB3C, member RAS oncogene family; RAB3C, member RAS oncogene family
80718	RAB27b, member RAS oncogene family
68708	RAB, member of RAS oncogene family-like 2A
68146	ADP-ribosylation factor-like 13B
19341	RAB4A, member RAS oncogene family
19700	rad and gem related GTP binding protein 1
68895	RAS-like, family 11, member A
75869	ADP-ribosylation factor-like 5B
76166	RIKEN cDNA 6330545A04 gene
219144	ADP-ribosylation factor-like 11
217371	Rab40b, member RAS oncogene family
Gene Group 17	Enrichment Score: 0.515910599544815
ENTREZ_GENE_ID	Gene Name
100763	ubiquitin protein ligase E3C
76980	RIKEN cDNA 3110006E14 gene
66799	ubiquitin-conjugating enzyme E2W (putative)
22195	predicted gene 7423; predicted gene 5858; predicted gene 6562; similar to ubiquitin-conjugating enzyme UbcH7; predicted gene 3076; ubiquitin-conjugating enzyme E2L 3; predicted gene 15267; predicted gene 9057; predicted gene 10705; predicted gene 10145
22201	ubiquitin-like modifier activating enzyme 1
22194	similar to Ubiquitin-conjugating enzyme E2 E1 (Ubiquitin-protein ligase E1) (Ubiquitin carrier protein E1) (UbcM3); ubiquitin-conjugating enzyme E2E 1, UBC4/5 homolog (yeast)
Gene Group 18	Enrichment Score: 0.4380826533196508
ENTREZ_GENE_ID	Gene Name
140494	ATPase, H+ transporting, lysosomal V0 subunit A4
381290	ATPase, Ca++ transporting, plasma membrane 4
74915	ATPase, H+ transporting, lysosomal V1 subunit E2
67972	ATPase, Ca++ transporting, plasma membrane 1
74772	ATPase type 13A2
Gene Group 19	Enrichment Score: 0.05229595445082476
ENTREZ_GENE_ID	Gene Name
380728	potassium voltage-gated channel, subfamily H (eag-related), member 4
57442	potassium voltage-gated channel, Isk-related subfamily, gene 3; hypothetical protein LOC100044693
192192	Sh3kbp1 binding protein 1
240444	potassium voltage-gated channel, subfamily G, member 2
622320	potassium channel tetramerisation domain containing 21
216858	potassium channel tetramerisation domain containing 11
52150	potassium inwardly-rectifying channel, subfamily K, member 6
74096	hydrogen voltage-gated channel 1
Gene Group 20	Enrichment Score: 0.016822386723616863
ENTREZ_GENE_ID	Gene Name
71913	transmembrane protein 79
229722	RIKEN cDNA 5330417C22 gene
217843	unc-79 homolog (C. elegans)
68634	TM2 domain containing 3
71862	G protein-coupled receptor 160
229227	RIKEN cDNA 4932438A13 gene
353499	transmembrane channel-like gene family 4
103743	transmembrane protein 98
17441	myelin oligodendrocyte glycoprotein
100040099	immediate early response 3 interacting protein 1; haloacid dehalogenase-like hydrolase domain containing 2; predicted gene 10784
330096	shisa homolog 3 (Xenopus laevis)
73692	RIKEN cDNA 2410089E03 gene
319430	hypothetical protein LOC100044252; G protein-coupled receptor 77
67708	RIKEN cDNA 1810048J11 gene
207798	GRAM domain containing 1C
75146	transmembrane protein 180
277010	MARVEL (membrane-associating) domain containing 1
380732	predicted gene 885
243764	cholinergic receptor, muscarinic 2, cardiac
214424	poly (ADP-ribose) polymerase family, member 16
102570	solute carrier family 22 (organic cation transporter), member 13
69161	similar to Manbal protein; mannosidase, beta A, lysosomal-like
232414	C-type lectin domain family 9, member a
12776	chemokine (C-C motif) receptor 8
212980	solute carrier family 45, member 3
270152	adhesion molecule, interacts with CXADR antigen 1
54637	PRA1 domain family 2; predicted gene 4168
216197	cytoskeleton-associated protein 4
66240	potassium voltage-gated channel, Isk-related family, member 1-like
19265	protein tyrosine phosphatase, receptor type, C polypeptide-associated protein
381259	amyotrophic lateral sclerosis 2 (juvenile) chromosome region, candidate 4
319998	transmembrane protein 198
215085	solute carrier family 35, member F1
231571	RNA polymerase II associated protein 2
20932	surfeit gene 4
71781	solute carrier family 16 (monocarboxylic acid transporters), member 14
74257	tetraspanin 17
140559	immunoglobulin superfamily, member 8
68344	transmembrane protein 174
81907	transmembrane protein 108
258818	similar to MOR 3Beta5; olfactory receptor 629
18106	CD244 natural killer cell receptor 2B4; similar to Natural killer cell receptor 2B4 precursor (NKR2B4) (NK cell type I receptor protein 2B4) (CD244 antigen) (Non MHC restricted killing associated)
72472	solute carrier family 16 (monocarboxylic acid transporters), member 10
68644	abhydrolase domain containing 14A
70617	RIKEN cDNA 5730508B09 gene
237979	sidekick homolog 2 (chicken)
72982	transmembrane protein 138
407243	predicted gene 6194; transmembrane protein 189
387343	taste receptor, type 2, member 109
242721	kelch domain containing 7A
227615	RIKEN cDNA C730025P13 gene
77037	melanocortin 2 receptor accessory protein
74411	phosphatidic acid phosphatase type 2 domain containing 2
67846	transmembrane protein 39a
12802	cannabinoid receptor 2 (macrophage)
68859	RIKEN cDNA 1190007F08 gene
71183	C-type lectin domain family 12, member B
100045362	similar to olfactory receptor Olfr747; olfactory receptor 749; olfactory receptor 747
67419	RIKEN cDNA 3632451O06 gene
66789	asparagine-linked glycosylation 14 homolog (yeast)
216964	transformation related protein 53 inducible protein 13
67416	armadillo repeat containing, X-linked 2
18703	polymeric immunoglobulin receptor
78217	transmembrane protein 210
258272	olfactory receptor 1402
258186	olfactory receptor 380; hypothetical protein LOC100044155; olfactory receptor 75, pseudogene 1
67511	transmembrane emp24 protein transport domain containing 9
73225	family with sequence similarity 118, member A
171095	interleukin 17 receptor C
66039	predicted gene 10395; predicted gene 9746; DNA segment, Chr 14, ERATO Doi 449, expressed
26367	carcinoembryonic antigen-related cell adhesion molecule 1; carcinoembryonic antigen-related cell adhesion molecule 2
83924	similar to Gpr137b protein; G protein-coupled receptor 137B
69524	endothelial cell-specific adhesion molecule
66260	transmembrane protein 54
77582	membrane bound O-acyltransferase domain containing 7; hypothetical protein LOC100044576
239530	G protein-coupled receptor 20
226351	transmembrane protein 185B
68742	transmembrane protein 219
235044	cDNA sequence BC018242
12483	CD22 antigen; hypothetical protein LOC100047973
209837	solute carrier family 38, member 5
207683	immunoglobulin superfamily, member 11
68545	endothelial cell-specific chemotaxis regulator
223827	glycosyltransferase 8 domain containing 3
57276	V-set and immunoglobulin domain containing 2
259105	olfactory receptor 549
238377	G protein-coupled receptor 68
64339	fibronectin type III domain containing 4
330222	sidekick homolog 1 (chicken)
18146	neural proliferation, differentiation and control gene 1
